# Supplementary material for: Exploring a series of multifunctional Mn(i) tricarbonyls as prospective agents against trypanosomatid parasites: a comparative study with the Re(i) analogues
Source: Royal Society of Chemistry journal article supplement (doi:10.1039/d5dt00241a), 2025-01-01
Supplement: d5dt00241a1.xlsx [file d5dt00241a1.xlsx]

## Sheet: onlyCtrl(vs Mn-compound)
Exclusively detected in untreated samples vs fac-[Mn(CO)3(CTZ)(tmp)](PF6)
Uniprot ID	Replicate Count	Quant CDF	Variation Score	RHV Score	Total Signal	Description
tr|V5BB58|V5BB58_TRYCR	2	0.361	0.6	0.543	1.18962e-05	Uncharacterized protein OS=Trypanosoma cruzi Dm28c OX=1416333 GN=TCDM_06838 PE=4 SV=1
tr|V5C0R1|V5C0R1_TRYCR	2	0.977	0.73	0.791	0.000530787	Uncharacterized protein OS=Trypanosoma cruzi Dm28c OX=1416333 GN=TCDM_00876 PE=4 SV=1
tr|V5BIV4|V5BIV4_TRYCR	3	0.175	0.53	0.568	6.98937e-06	Dual specificity protein phosphatase OS=Trypanosoma cruzi Dm28c OX=1416333 GN=TCDM_05512 PE=4 SV=1
tr|V5BB69|V5BB69_TRYCR	2	0.133	0.54	0.447	3.4939e-06	Methyltransferase OS=Trypanosoma cruzi Dm28c OX=1416333 GN=TCDM_06862 PE=3 SV=1
tr|V5B948|V5B948_TRYCR	3	0.128	0.65	0.593	5.06814e-06	Uncharacterized protein OS=Trypanosoma cruzi Dm28c OX=1416333 GN=TCDM_09802 PE=4 SV=1
tr|V5BCN4|V5BCN4_TRYCR	3	0.145	0.64	0.595	5.74313e-06	non-specific serine/threonine protein kinase OS=Trypanosoma cruzi Dm28c OX=1416333 GN=TCDM_06063 PE=4 SV=1
tr|V5BAA5|V5BAA5_TRYCR	2	0.155	0.57	0.464	4.10165e-06	Leucine zipper transcription factor-like protein 1 OS=Trypanosoma cruzi Dm28c OX=1416333 GN=TCDM_09291 PE=3 SV=1
tr|V5C080|V5C080_TRYCR	2	0.104	0.57	0.447	2.76515e-06	Uncharacterized protein OS=Trypanosoma cruzi Dm28c OX=1416333 GN=TCDM_00972 PE=4 SV=1
tr|V5C139|V5C139_TRYCR	3	0.082	0.63	0.571	3.33301e-06	Transcription modulator/accessory protein OS=Trypanosoma cruzi Dm28c OX=1416333 GN=TCDM_00637 PE=4 SV=1
tr|V5BC43|V5BC43_TRYCR	2	0.153	0.57	0.463	4.05321e-06	eIF-2B GDP-GTP exchange factor subunit gamma OS=Trypanosoma cruzi Dm28c OX=1416333 GN=TCDM_06396 PE=3 SV=1
tr|V5BPL4|V5BPL4_TRYCR	2	0.086	0.62	0.458	2.33912e-06	Large ribosomal subunit protein mL43 OS=Trypanosoma cruzi Dm28c OX=1416333 GN=TCDM_04884 PE=3 SV=1
tr|V5BAF5|V5BAF5_TRYCR	2	0.155	0.54	0.454	4.0876e-06	NADH-ubiquinone oxidoreductase complex I subunit OS=Trypanosoma cruzi Dm28c OX=1416333 GN=TCDM_01065 PE=4 SV=1
tr|V5DJL3|V5DJL3_TRYCR	3	0.116	0.52	0.545	4.59121e-06	Actin OS=Trypanosoma cruzi Dm28c OX=1416333 GN=TCDM_03638 PE=3 SV=1
tr|V5B1Q7|V5B1Q7_TRYCR	2	0.018	0.56	0.415	7.20476e-07	Ancestral coatomer element 1 Sec16/Sec31 domain-containing protein OS=Trypanosoma cruzi Dm28c OX=1416333 GN=TCDM_04297 PE=3 SV=1
tr|V5BVQ0|V5BVQ0_TRYCR	2	0.216	0.55	0.478	5.92683e-06	RNA-binding protein 38 OS=Trypanosoma cruzi Dm28c OX=1416333 GN=TCDM_00749 PE=4 SV=1
tr|V5BVM8|V5BVM8_TRYCR	2	0.229	0.6	0.499	6.3823e-06	Transmembrane protein OS=Trypanosoma cruzi Dm28c OX=1416333 GN=TCDM_13916 PE=4 SV=1
tr|V5AUU9|V5AUU9_TRYCR	2	0.234	0.55	0.484	6.52827e-06	Uncharacterized protein OS=Trypanosoma cruzi Dm28c OX=1416333 GN=TCDM_07313 PE=4 SV=1
tr|V5BMT1|V5BMT1_TRYCR	2	0.145	0.52	0.444	3.82336e-06	Uncharacterized protein OS=Trypanosoma cruzi Dm28c OX=1416333 GN=TCDM_05681 PE=4 SV=1
tr|V5B0T6|V5B0T6_TRYCR	3	0.144	0.54	0.561	5.71235e-06	Zinc finger, MYND-type containing 10 OS=Trypanosoma cruzi Dm28c OX=1416333 GN=TCDM_04590 PE=4 SV=1
tr|V5BMI7|V5BMI7_TRYCR	3	0.066	0.58	0.549	2.7861e-06	TRAF-type domain-containing protein OS=Trypanosoma cruzi Dm28c OX=1416333 GN=TCDM_05822 PE=4 SV=1
tr|V5BNV6|V5BNV6_TRYCR	2	0.459	0.54	0.555	1.78934e-05	WW domain-containing protein OS=Trypanosoma cruzi Dm28c OX=1416333 GN=TCDM_05131 PE=4 SV=1
tr|V5BEC0|V5BEC0_TRYCR	3	0.161	0.64	0.6	6.40838e-06	Ubiquinone biosynthesis protein OS=Trypanosoma cruzi Dm28c OX=1416333 GN=TCDM_05439 PE=3 SV=1
tr|V5BV49|V5BV49_TRYCR	2	0.077	0.58	0.441	2.12387e-06	cyclin-dependent kinase OS=Trypanosoma cruzi Dm28c OX=1416333 GN=TCDM_01189 PE=3 SV=1
tr|V5B903|V5B903_TRYCR	2	0.111	0.57	0.449	2.94167e-06	non-specific serine/threonine protein kinase OS=Trypanosoma cruzi Dm28c OX=1416333 GN=TCDM_01452 PE=3 SV=1
tr|V5B520|V5B520_TRYCR	3	0.191	0.55	0.58	7.7205e-06	Uncharacterized protein OS=Trypanosoma cruzi Dm28c OX=1416333 GN=TCDM_02888 PE=3 SV=1
tr|V5AQU0|V5AQU0_TRYCR	2	0.148	0.63	0.482	3.92e-06	Uncharacterized protein OS=Trypanosoma cruzi Dm28c OX=1416333 GN=TCDM_09124 PE=4 SV=1
tr|V5AUY3|V5AUY3_TRYCR	2	0.223	0.59	0.493	6.15852e-06	GTP-binding protein OS=Trypanosoma cruzi Dm28c OX=1416333 GN=TCDM_07281 PE=4 SV=1
tr|V5BMY3|V5BMY3_TRYCR	3	0.106	0.64	0.582	4.20597e-06	C3H1-type domain-containing protein OS=Trypanosoma cruzi Dm28c OX=1416333 GN=TCDM_05617 PE=4 SV=1
tr|V5BGT7|V5BGT7_TRYCR	3	0.206	0.59	0.599	8.42271e-06	N-acetyltransferase B complex (NatB) non catalytic subunit OS=Trypanosoma cruzi Dm28c OX=1416333 GN=TCDM_08480 PE=3 SV=1
tr|V5BC62|V5BC62_TRYCR	2	0.148	0.56	0.458	3.89697e-06	START domain-containing protein OS=Trypanosoma cruzi Dm28c OX=1416333 GN=TCDM_00306 PE=4 SV=1
tr|V5B1G9|V5B1G9_TRYCR	2	0.159	0.65	0.492	4.20067e-06	Uncharacterized protein OS=Trypanosoma cruzi Dm28c OX=1416333 GN=TCDM_11011 PE=4 SV=1
tr|V5BCQ7|V5BCQ7_TRYCR	2	0.086	0.56	0.438	2.33857e-06	Mucin-associated surface protein (MASP) OS=Trypanosoma cruzi Dm28c OX=1416333 GN=TCDM_06099 PE=4 SV=1
tr|V5B593|V5B593_TRYCR	2	0.148	0.56	0.458	3.91227e-06	Methyltransferase-like protein OS=Trypanosoma cruzi Dm28c OX=1416333 GN=TCDM_02769 PE=3 SV=1
tr|V5DT71|V5DT71_TRYCR	2	0.119	0.66	0.482	3.1512e-06	MIT domain-containing protein OS=Trypanosoma cruzi Dm28c OX=1416333 GN=TCDM_13932 PE=4 SV=1
tr|V5B266|V5B266_TRYCR	2	0.157	0.52	0.448	4.14611e-06	Uncharacterized protein OS=Trypanosoma cruzi Dm28c OX=1416333 GN=TCDM_04041 PE=4 SV=1
tr|V5BJN3|V5BJN3_TRYCR	2	0.136	0.54	0.448	3.59061e-06	RNA-binding protein OS=Trypanosoma cruzi Dm28c OX=1416333 GN=TCDM_03300 PE=4 SV=1
tr|V5DR06|V5DR06_TRYCR	2	0.491	0.57	0.576	2.03834e-05	DNA helicase OS=Trypanosoma cruzi Dm28c OX=1416333 GN=TCDM_01294 PE=4 SV=1
tr|V5BR47|V5BR47_TRYCR	3	0.167	0.52	0.562	6.63882e-06	Uncharacterized protein OS=Trypanosoma cruzi Dm28c OX=1416333 GN=TCDM_14310 PE=4 SV=1
tr|V5C2N5|V5C2N5_TRYCR	3	0.056	0.69	0.582	2.44161e-06	R3H domain-containing protein OS=Trypanosoma cruzi Dm28c OX=1416333 GN=TCDM_00042 PE=4 SV=1
tr|V5BD72|V5BD72_TRYCR	3	0.086	0.63	0.572	3.49296e-06	Uncharacterized protein OS=Trypanosoma cruzi Dm28c OX=1416333 GN=TCDM_05930 PE=4 SV=1
tr|V5AQT6|V5AQT6_TRYCR	2	0.142	0.57	0.46	3.74871e-06	GDP-L-fucose synthase OS=Trypanosoma cruzi Dm28c OX=1416333 GN=TCDM_09119 PE=3 SV=1
tr|V5AR23|V5AR23_TRYCR	2	0.08	0.53	0.426	2.1779e-06	2,4-dienoyl-coa reductase fadh1 OS=Trypanosoma cruzi Dm28c OX=1416333 GN=TCDM_09004 PE=4 SV=1
tr|V5ATD3|V5ATD3_TRYCR	2	0.177	0.64	0.495	4.72092e-06	Formin like proteiny 2 (FH2) domain protein OS=Trypanosoma cruzi Dm28c OX=1416333 GN=TCDM_07992 PE=4 SV=1
tr|V5DBU7|V5DBU7_TRYCR	2	0.208	0.63	0.502	5.67294e-06	C3H1-type domain-containing protein OS=Trypanosoma cruzi Dm28c OX=1416333 GN=TCDM_06841 PE=4 SV=1
tr|V5ATM8|V5ATM8_TRYCR	2	0.242	0.65	0.52	6.82394e-06	F-box domain-containing protein OS=Trypanosoma cruzi Dm28c OX=1416333 GN=TCDM_07859 PE=4 SV=1
tr|V5DPP5|V5DPP5_TRYCR	3	0.074	0.56	0.545	3.06222e-06	non-specific serine/threonine protein kinase OS=Trypanosoma cruzi Dm28c OX=1416333 GN=TCDM_01931 PE=3 SV=1
tr|V5BKE3|V5BKE3_TRYCR	2	0.156	0.57	0.464	4.12726e-06	Uncharacterized protein OS=Trypanosoma cruzi Dm28c OX=1416333 GN=TCDM_13851 PE=4 SV=1
tr|V5DLG0|V5DLG0_TRYCR	3	0.039	0.62	0.553	1.85068e-06	NAD-dependent epimerase/dehydratase domain-containing protein OS=Trypanosoma cruzi Dm28c OX=1416333 GN=TCDM_03032 PE=4 SV=1
tr|V5BPT0|V5BPT0_TRYCR	2	0.074	0.55	0.43	2.04213e-06	Actin-related protein 3 OS=Trypanosoma cruzi Dm28c OX=1416333 GN=TCDM_03139 PE=3 SV=1
tr|V5BZ70|V5BZ70_TRYCR	2	0.139	0.5	0.435	3.65389e-06	RRM domain-containing protein OS=Trypanosoma cruzi Dm28c OX=1416333 GN=TCDM_01271 PE=4 SV=1
tr|V5BIY9|V5BIY9_TRYCR	2	0.264	0.5	0.477	7.62843e-06	Uncharacterized protein OS=Trypanosoma cruzi Dm28c OX=1416333 GN=TCDM_07451 PE=4 SV=1
tr|V5BWE0|V5BWE0_TRYCR	2	0.077	0.65	0.465	2.11313e-06	Mucin TcMUCII OS=Trypanosoma cruzi Dm28c OX=1416333 GN=TCDM_02388 PE=4 SV=1
tr|V5BAY1|V5BAY1_TRYCR	2	0.071	0.55	0.429	1.9754e-06	RRM domain-containing protein OS=Trypanosoma cruzi Dm28c OX=1416333 GN=TCDM_06951 PE=4 SV=1
tr|V5BPJ5|V5BPJ5_TRYCR	2	0.066	0.51	0.414	1.85177e-06	Uncharacterized protein OS=Trypanosoma cruzi Dm28c OX=1416333 GN=TCDM_03217 PE=4 SV=1
tr|V5BL67|V5BL67_TRYCR	2	0.171	0.52	0.453	4.5557e-06	WW domain-containing protein OS=Trypanosoma cruzi Dm28c OX=1416333 GN=TCDM_06389 PE=4 SV=1
tr|V5AU86|V5AU86_TRYCR	3	0.238	0.6	0.613	1.00122e-05	Polyribonucleotide 5'-hydroxyl-kinase Clp1 P-loop domain-containing protein OS=Trypanosoma cruzi Dm28c OX=1416333 GN=TCDM_07610 PE=4 SV=1
tr|V5B8C1|V5B8C1_TRYCR	2	0.181	0.59	0.479	4.8572e-06	5-methylcytosine rRNA methyltransferase NSUN4 OS=Trypanosoma cruzi Dm28c OX=1416333 GN=TCDM_10103 PE=3 SV=1
tr|V5B995|V5B995_TRYCR	2	0.093	0.51	0.423	2.50774e-06	Mitochondrial RNA binding complex 1 subunit OS=Trypanosoma cruzi Dm28c OX=1416333 GN=TCDM_01260 PE=4 SV=1
tr|V5BQH6|V5BQH6_TRYCR	2	0.159	0.52	0.449	4.22084e-06	non-specific serine/threonine protein kinase OS=Trypanosoma cruzi Dm28c OX=1416333 GN=TCDM_01191 PE=3 SV=1
tr|V5BC20|V5BC20_TRYCR	2	0.075	0.54	0.427	2.06329e-06	Uncharacterized protein OS=Trypanosoma cruzi Dm28c OX=1416333 GN=TCDM_08564 PE=4 SV=1
tr|V5B0Z6|V5B0Z6_TRYCR	2	0.046	0.53	0.414	1.39899e-06	Uncharacterized protein OS=Trypanosoma cruzi Dm28c OX=1416333 GN=TCDM_04522 PE=4 SV=1
tr|V5DRZ7|V5DRZ7_TRYCR	2	0.064	0.57	0.434	1.81317e-06	PPIase cyclophilin-type domain-containing protein OS=Trypanosoma cruzi Dm28c OX=1416333 GN=TCDM_00955 PE=4 SV=1
tr|V5DKG4|V5DKG4_TRYCR	2	0.116	0.62	0.468	3.07105e-06	RNA 3'-terminal phosphate cyclase-like protein OS=Trypanosoma cruzi Dm28c OX=1416333 GN=TCDM_03424 PE=3 SV=1
tr|V5BCE0|V5BCE0_TRYCR	3	0.282	0.58	0.621	1.2489e-05	Serine aminopeptidase S33 domain-containing protein OS=Trypanosoma cruzi Dm28c OX=1416333 GN=TCDM_06305 PE=4 SV=1
tr|V5BGP1|V5BGP1_TRYCR	2	0.195	0.6	0.487	5.28054e-06	ADP-ribosylation factor GTPase activating protein 1 OS=Trypanosoma cruzi Dm28c OX=1416333 GN=TCDM_04450 PE=4 SV=1
tr|V5BF17|V5BF17_TRYCR	2	0.134	0.52	0.44	3.53363e-06	Cytoskeleton associated protein OS=Trypanosoma cruzi Dm28c OX=1416333 GN=TCDM_07220 PE=4 SV=1
tr|V5BEU9|V5BEU9_TRYCR	2	0.033	0.57	0.423	1.07863e-06	Rab-GAP TBC domain-containing protein OS=Trypanosoma cruzi Dm28c OX=1416333 GN=TCDM_05179 PE=4 SV=1
tr|V5BHN9|V5BHN9_TRYCR	2	0.727	0.59	0.661	5.61536e-05	EF-hand domain-containing protein OS=Trypanosoma cruzi Dm28c OX=1416333 GN=TCDM_05979 PE=4 SV=1
tr|V5B216|V5B216_TRYCR	2	0.531	0.57	0.589	2.39472e-05	AAA+ ATPase domain-containing protein OS=Trypanosoma cruzi Dm28c OX=1416333 GN=TCDM_04123 PE=4 SV=1
tr|V5BLJ1|V5BLJ1_TRYCR	2	0.013	0.55	0.41	5.82551e-07	SUI1 domain-containing protein OS=Trypanosoma cruzi Dm28c OX=1416333 GN=TCDM_02569 PE=4 SV=1
tr|V5B554|V5B554_TRYCR	2	0.024	0.54	0.41	8.587e-07	Tyrosine specific protein phosphatase OS=Trypanosoma cruzi Dm28c OX=1416333 GN=TCDM_02931 PE=4 SV=1
tr|V5BPJ2|V5BPJ2_TRYCR	2	0.785	0.58	0.677	7.55785e-05	Flagellar Member 4 OS=Trypanosoma cruzi Dm28c OX=1416333 GN=TCDM_04850 PE=4 SV=1
tr|V5BK27|V5BK27_TRYCR	2	0.094	0.55	0.437	2.52808e-06	Uncharacterized protein OS=Trypanosoma cruzi Dm28c OX=1416333 GN=TCDM_03071 PE=4 SV=1
tr|V5B9C8|V5B9C8_TRYCR	2	0.559	0.72	0.649	2.68498e-05	Uncharacterized protein OS=Trypanosoma cruzi Dm28c OX=1416333 GN=TCDM_01302 PE=4 SV=1
tr|V5ATI0|V5ATI0_TRYCR	2	0.325	0.55	0.514	1.01763e-05	Dynein heavy chain OS=Trypanosoma cruzi Dm28c OX=1416333 GN=TCDM_07913 PE=4 SV=1
tr|V5BP68|V5BP68_TRYCR	2	0.034	0.55	0.417	1.11382e-06	Uncharacterized protein OS=Trypanosoma cruzi Dm28c OX=1416333 GN=TCDM_04988 PE=4 SV=1
tr|V5BQC3|V5BQC3_TRYCR	2	0.019	0.54	0.409	7.35707e-07	Uncharacterized protein OS=Trypanosoma cruzi Dm28c OX=1416333 GN=TCDM_04573 PE=4 SV=1
tr|V5B895|V5B895_TRYCR	2	0.027	0.6	0.431	9.45237e-07	Leucine-rich repeat-containing protein 51 OS=Trypanosoma cruzi Dm28c OX=1416333 GN=TCDM_08186 PE=4 SV=1
tr|V5AUS2|V5AUS2_TRYCR	2	0.046	0.59	0.434	1.39409e-06	GPI transamidase component Tta1 OS=Trypanosoma cruzi Dm28c OX=1416333 GN=TCDM_07355 PE=4 SV=1
tr|V5BLW1|V5BLW1_TRYCR	2	0.081	0.54	0.429	2.19939e-06	adenosine kinase OS=Trypanosoma cruzi Dm28c OX=1416333 GN=TCDM_02507 PE=3 SV=1
tr|V5DD41|V5DD41_TRYCR	2	0.21	0.56	0.479	5.74071e-06	TBC1 domain family member 23 OS=Trypanosoma cruzi Dm28c OX=1416333 GN=TCDM_06293 PE=4 SV=1
tr|V5DEP1|V5DEP1_TRYCR	2	0.067	0.56	0.431	1.88145e-06	Cytosolic Fe-S cluster assembly factor NUBP1 homolog OS=Trypanosoma cruzi Dm28c OX=1416333 GN=TCDM_05629 PE=3 SV=1
tr|V5BAM3|V5BAM3_TRYCR	2	0.067	0.66	0.465	1.88553e-06	Uncharacterized protein OS=Trypanosoma cruzi Dm28c OX=1416333 GN=TCDM_07078 PE=3 SV=1
tr|V5AXX0|V5AXX0_TRYCR	2	0.441	0.54	0.549	1.66293e-05	Mucin-associated surface protein (MASP) OS=Trypanosoma cruzi Dm28c OX=1416333 GN=TCDM_13844 PE=4 SV=1
tr|V5BGI7|V5BGI7_TRYCR	2	0.059	0.52	0.415	1.68567e-06	Importin N-terminal domain-containing protein OS=Trypanosoma cruzi Dm28c OX=1416333 GN=TCDM_06515 PE=4 SV=1
tr|V5B6T4|V5B6T4_TRYCR	2	0.08	0.69	0.479	2.17351e-06	Translation-associated element 2 OS=Trypanosoma cruzi Dm28c OX=1416333 GN=TCDM_10684 PE=3 SV=1
tr|V5BKX8|V5BKX8_TRYCR	2	0.077	0.53	0.425	2.1052e-06	Uncharacterized protein OS=Trypanosoma cruzi Dm28c OX=1416333 GN=TCDM_06570 PE=4 SV=1

## Sheet: onlyMn-compund
Exclusively detected in samples treated with fac-[Mn(CO)3(tmp)(CTZ)](PF6)
Uniprot ID	Replicate Count	Quant CDF	Variation Score	RHV Score	Total Signal	Description
tr|V5BI65|V5BI65_TRYCR	2	0.824	0.73	0.74	9.52462e-05	Uncharacterized protein OS=Trypanosoma cruzi Dm28c OX=1416333 GN=TCDM_14481 PE=4 SV=1
tr|V5B7R1|V5B7R1_TRYCR	2	0.684	0.69	0.68	4.57768e-05	Uncharacterized protein OS=Trypanosoma cruzi Dm28c OX=1416333 GN=TCDM_14161 PE=4 SV=1
tr|V5AS61|V5AS61_TRYCR	3	0.372	0.53	0.634	1.8705e-05	Uncharacterized protein OS=Trypanosoma cruzi Dm28c OX=1416333 GN=TCDM_08502 PE=4 SV=1
tr|V5BC66|V5BC66_TRYCR	2	0.426	0.64	0.578	1.56349e-05	Ribonuclease inhibitor-like protein OS=Trypanosoma cruzi Dm28c OX=1416333 GN=TCDM_00314 PE=4 SV=1
tr|V5BCK5|V5BCK5_TRYCR	3	0.304	0.77	0.691	1.38432e-05	Acid phosphatase OS=Trypanosoma cruzi Dm28c OX=1416333 GN=TCDM_08279 PE=3 SV=1

## Sheet: decreasedMn-compound
Relative abundance decreased in parasites treated with fac-[Mn(CO)3(tmp)(CTZ)](PF6)
Locus	Peptide Count	Coverage %	Log2(FoldChange)	p-value	Description	Acc nro Uniprot Tc Dm28c	Acc nro Uniprot Tc Brener	Acc nro Uniprot T brucei
tr|V5BKY8|V5BKY8_TRYCR	4	0.077	2.136	0.0430251	Peroxisome biogenesis factor 1 OS=Trypanosoma cruzi Dm28c OX=1416333 GN=TCDM_02845 PE=3 SV=1	V5BKY8	A0A2V2UJ45	Q581V6
tr|V5BL87|V5BL87_TRYCR	4	0.286	1.309	0.0141389	MsrB domain-containing protein OS=Trypanosoma cruzi Dm28c OX=1416333 GN=TCDM_06423 PE=3 SV=1	V5BL87	A0A2V2VRA3	Q382Y8
tr|V5DJP1|V5DJP1_TRYCR	10	0.687	1.217	3.35179e-05	Putative ATP-dependent DEAD/H RNA helicase OS=Trypanosoma cruzi Dm28c OX=1416333 GN=TCDM_03689 PE=4 SV=1	V5DJP1	A0A2V2V3D3	Q38BK1
tr|V5DB04|V5DB04_TRYCR	6	0.317	1.156	0.0226686	Uncharacterized protein OS=Trypanosoma cruzi Dm28c OX=1416333 GN=TCDM_07293 PE=4 SV=1	V5DB04	A0A2V2ULP4	Q57Z37
tr|V5DAL2|V5DAL2_TRYCR	4	0.268	1.13	0.00981737	Ribosomal protein L38 OS=Trypanosoma cruzi Dm28c OX=1416333 GN=TCDM_07391 PE=3 SV=1	V5DAL2	A0A2V2WI37	Q38FV6
tr|V5BP35|V5BP35_TRYCR	4	0.213	1.068	0.0101762	Chaperonin HSP60 OS=Trypanosoma cruzi Dm28c OX=1416333 GN=TCDM_05098 PE=3 SV=1	V5BP35	A0A2V2V375	Q381T1
tr|V5BCW8|V5BCW8_TRYCR	9	0.498	1.062	0.0163756	Haloacid dehalogenase-like hydrolase OS=Trypanosoma cruzi Dm28c OX=1416333 GN=TCDM_10099 PE=4 SV=1	V5BCW8	A0A2V2VSB2	Q381M7
tr|V5BBT3|V5BBT3_TRYCR	8	0.335	1.046	0.00060415	Uncharacterized protein OS=Trypanosoma cruzi Dm28c OX=1416333 GN=TCDM_00495 PE=4 SV=1	V5BBT3	A0A2V2VYL0	Q388D4
tr|V5BRN5|V5BRN5_TRYCR	12	0.206	1.036	0.020407	Uncharacterized protein OS=Trypanosoma cruzi Dm28c OX=1416333 GN=TCDM_04147 PE=4 SV=1	V5BRN5	A0A2V2V9K1	Q386G2
tr|V5BFJ0|V5BFJ0_TRYCR	3	0.155	1.018	0.0228793	Uncharacterized protein OS=Trypanosoma cruzi Dm28c OX=1416333 GN=TCDM_09034 PE=4 SV=1	V5BFJ0	A0A2V2USM2	Q38CB7
tr|V5BGW0|V5BGW0_TRYCR	17	0.376	1.014	0.0229698	Translation initiation factor OS=Trypanosoma cruzi Dm28c OX=1416333 GN=TCDM_04357 PE=3 SV=1	V5BGW0	A0A2V2VB63	Q57Z81
tr|V5D8Z5|V5D8Z5_TRYCR	8	0.114	1.006	0.00469911	Cullin family profile domain-containing protein OS=Trypanosoma cruzi Dm28c OX=1416333 GN=TCDM_08102 PE=3 SV=1	V5D8Z5	A0A2V2UIE0	Q57XW2

## Sheet: increasedMn-compound
Relative abundance increased in parasites treated with fac-[Mn(CO)3(tmp)(CTZ)](PF6)
Locus	Peptide Count	Coverage %	Log2(FoldChange)	p-value	Description	Acc nro Uniprot Tc Dm28c	Acc nro Uniprot Tc Brener	Acc nro Uniprot T brucei
tr|V5BU64|V5BU64_TRYCR	9	0.658	5.51	2.03235e-05	Universal minicircle sequence binding protein (UMSBP) OS=Trypanosoma cruzi Dm28c OX=1416333 GN=TCDM_13905 PE=4 SV=1	V5BU64	A0A2V2V323	Q38B00
tr|V5BU71|V5BU71_TRYCR	7	0.657	5.079	1.29417e-06	Universal minicircle sequence binding protein (UMSBP),zinc finger protein PDZ5 OS=Trypanosoma cruzi Dm28c OX=1416333 GN=TCDM_14391 PE=4 SV=1	V5BU71	AAU01009.1	Q38AZ9
tr|V5D4J9|V5D4J9_TRYCR	3	0.474	4.174	0.039375	Putative I/6 autoantigen OS=Trypanosoma cruzi Dm28c OX=1416333 GN=TCDM_09935 PE=4 SV=1	V5D4J9	--	--
tr|V5BTH8|V5BTH8_TRYCR	2	0.081	2.862	0.0196821	Trans-sialidase OS=Trypanosoma cruzi Dm28c OX=1416333 GN=TCDM_03375 PE=4 SV=1	V5BTH8	A0A2V2VFM9	Q38D60

## Sheet: onlyCtrl(vs Re-compound)
Exclusively detected in untreated samples vs fac-[Re(CO)3(CTZ)(tmp)](PF6)
Uniprot ID	Replicate Count	Quant CDF	Variation Score	RHV Score	Total Signal	Description
tr|V5AWJ3|V5AWJ3_TRYCR	6	0.331	0.67	0.667	298000000000	Lysine decarboxylase domain-containing protein OS=Trypanosoma cruzi Dm28c OX=1416333 GN=TCDM_06431 PE=4 SV=1
tr|V5BAW8|V5BAW8_TRYCR	6	0.43	0.56	0.663	46100000000	Copper homeostasis protein cutC homolog OS=Trypanosoma cruzi Dm28c OX=1416333 GN=TCDM_00901 PE=3 SV=1
tr|V5BCV8|V5BCV8_TRYCR	6	0.307	0.57	0.626	266000000000	CRAL-TRIO domain-containing protein OS=Trypanosoma cruzi Dm28c OX=1416333 GN=TCDM_00135 PE=4 SV=1
tr|V5B7B8|V5B7B8_TRYCR	6	0.411	0.67	0.694	425000000000	formate--tetrahydrofolate ligase OS=Trypanosoma cruzi Dm28c OX=1416333 GN=TCDM_02174 PE=3 SV=1
tr|V5BMW9|V5BMW9_TRYCR	6	0.585	0.82	0.802	88400000000	Methionine aminopeptidase 2 OS=Trypanosoma cruzi Dm28c OX=1416333 GN=TCDM_05592 PE=3 SV=1
tr|V5BXV4|V5BXV4_TRYCR	6	0.17	0.61	0.593	126000000000	Uncharacterized protein OS=Trypanosoma cruzi Dm28c OX=1416333 GN=TCDM_00046 PE=4 SV=1
tr|V5BH55|V5BH55_TRYCR	4	0.216	0.66	0.514	111000000000	E3 ubiquitin-protein ligase OS=Trypanosoma cruzi Dm28c OX=1416333 GN=TCDM_08238 PE=3 SV=1
tr|V5BYW3|V5BYW3_TRYCR	4	0.181	0.57	0.473	9000000000	TOG domain-containing protein OS=Trypanosoma cruzi Dm28c OX=1416333 GN=TCDM_01419 PE=3 SV=1
tr|V5DSI7|V5DSI7_TRYCR	6	0.261	0.69	0.65	213000000000	Signal recognition particle 54 kDa protein OS=Trypanosoma cruzi Dm28c OX=1416333 GN=TCDM_00820 PE=3 SV=1
tr|V5B8X9|V5B8X9_TRYCR	6	0.513	0.78	0.764	65100000000	Kinesin OS=Trypanosoma cruzi Dm28c OX=1416333 GN=TCDM_07969 PE=3 SV=1
tr|V5BJB7|V5BJB7_TRYCR	4	0.118	0.61	0.465	5700000000	SET domain-containing protein OS=Trypanosoma cruzi Dm28c OX=1416333 GN=TCDM_07303 PE=4 SV=1
tr|V5BR94|V5BR94_TRYCR	4	0.243	0.53	0.48	129000000000	Translation initiation factor IF-2 OS=Trypanosoma cruzi Dm28c OX=1416333 GN=TCDM_02624 PE=4 SV=1
tr|V5BGU0|V5BGU0_TRYCR	6	0.141	0.69	0.61	102000000000	Nudix hydrolase domain-containing protein OS=Trypanosoma cruzi Dm28c OX=1416333 GN=TCDM_06318 PE=4 SV=1
tr|V5BB58|V5BB58_TRYCR	3	0.338	0.64	0.493	15400000000	Uncharacterized protein OS=Trypanosoma cruzi Dm28c OX=1416333 GN=TCDM_06838 PE=4 SV=1
tr|V5C0R1|V5C0R1_TRYCR	4	0.974	0.85	0.83	0.00106157	Uncharacterized protein OS=Trypanosoma cruzi Dm28c OX=1416333 GN=TCDM_00876 PE=4 SV=1
tr|V5BT47|V5BT47_TRYCR	4	0.115	0.56	0.447	5570000000	Arginine N-methyltransferase OS=Trypanosoma cruzi Dm28c OX=1416333 GN=TCDM_01886 PE=4 SV=1
tr|V5C2Y8|V5C2Y8_TRYCR	6	0.107	0.65	0.586	7780000000	tRNA wybutosine-synthesizing protein 4 OS=Trypanosoma cruzi Dm28c OX=1416333 GN=TCDM_00207 PE=3 SV=1
tr|V5BB69|V5BB69_TRYCR	3	0.136	0.66	0.432	49500000000	Methyltransferase OS=Trypanosoma cruzi Dm28c OX=1416333 GN=TCDM_06862 PE=3 SV=1
tr|V5BRS0|V5BRS0_TRYCR	6	0.097	0.57	0.556	7060000000	Guanine nucleotide-binding protein subunit beta-like protein OS=Trypanosoma cruzi Dm28c OX=1416333 GN=TCDM_04045 PE=4 SV=1
tr|V5DT29|V5DT29_TRYCR	6	0.328	0.73	0.686	294000000000	Uncharacterized protein OS=Trypanosoma cruzi Dm28c OX=1416333 GN=TCDM_00666 PE=4 SV=1
tr|V5BSS9|V5BSS9_TRYCR	4	0.446	0.77	0.628	3290000000	Vacuolar ATP synthase subunit d OS=Trypanosoma cruzi Dm28c OX=1416333 GN=TCDM_03646 PE=3 SV=1
tr|V5BHL3|V5BHL3_TRYCR	6	0.158	0.54	0.566	116000000000	Ubiquitin fusion degardation protein OS=Trypanosoma cruzi Dm28c OX=1416333 GN=TCDM_05942 PE=3 SV=1
tr|V5BCN4|V5BCN4_TRYCR	6	0.156	0.76	0.639	11500000000	non-specific serine/threonine protein kinase OS=Trypanosoma cruzi Dm28c OX=1416333 GN=TCDM_06063 PE=4 SV=1
tr|V5BS04|V5BS04_TRYCR	6	0.454	0.59	0.681	50900000000	Mucin-like glycoprotein OS=Trypanosoma cruzi Dm28c OX=1416333 GN=TCDM_03980 PE=3 SV=1
tr|V5BAY8|V5BAY8_TRYCR	6	0.214	0.64	0.618	165000000000	Katanin p60 ATPase-containing subunit A1 OS=Trypanosoma cruzi Dm28c OX=1416333 GN=KATNA1 PE=3 SV=1
tr|V5BGF8|V5BGF8_TRYCR	6	0.187	0.6	0.596	14100000000	Tyrosine specific protein phosphatase OS=Trypanosoma cruzi Dm28c OX=1416333 GN=TCDM_06575 PE=4 SV=1
tr|V5D179|V5D179_TRYCR	6	0.107	0.71	0.606	776000000	Protein kinase OS=Trypanosoma cruzi Dm28c OX=1416333 GN=TCDM_11204 PE=3 SV=1
tr|V5B8Y7|V5B8Y7_TRYCR	4	0.222	0.76	0.55	115000000000	MATH domain-containing protein OS=Trypanosoma cruzi Dm28c OX=1416333 GN=TCDM_07912 PE=4 SV=1
tr|V5BAA5|V5BAA5_TRYCR	4	0.167	0.64	0.491	8200000000	Leucine zipper transcription factor-like protein 1 OS=Trypanosoma cruzi Dm28c OX=1416333 GN=TCDM_09291 PE=3 SV=1
tr|V5BE13|V5BE13_TRYCR	6	0.383	0.69	0.691	377000000000	NUP-1 protein OS=Trypanosoma cruzi Dm28c OX=1416333 GN=TCDM_05455 PE=4 SV=1
tr|V5DB39|V5DB39_TRYCR	6	0.096	0.63	0.575	703000000	Coatomer beta subunit OS=Trypanosoma cruzi Dm28c OX=1416333 GN=TCDM_07252 PE=4 SV=1
tr|V5C080|V5C080_TRYCR	4	0.114	0.59	0.457	55300000000	Uncharacterized protein OS=Trypanosoma cruzi Dm28c OX=1416333 GN=TCDM_00972 PE=4 SV=1
tr|V5C139|V5C139_TRYCR	6	0.091	0.63	0.574	667000000	Transcription modulator/accessory protein OS=Trypanosoma cruzi Dm28c OX=1416333 GN=TCDM_00637 PE=4 SV=1
tr|V5BQF3|V5BQF3_TRYCR	6	0.186	0.6	0.595	139000000000	Rhodanese domain-containing protein OS=Trypanosoma cruzi Dm28c OX=1416333 GN=TCDM_02793 PE=3 SV=1
tr|V5BC36|V5BC36_TRYCR	6	0.274	0.57	0.615	227000000000	Present in the outer mitochondrial membrane proteome 22 OS=Trypanosoma cruzi Dm28c OX=1416333 GN=TCDM_08533 PE=4 SV=1
tr|V5DUQ3|V5DUQ3_TRYCR	4	0.236	0.59	0.498	124000000000	U2A'/phosphoprotein 32 family A C-terminal domain-containing protein OS=Trypanosoma cruzi Dm28c OX=1416333 GN=TCDM_00161 PE=4 SV=1
tr|V5BTR4|V5BTR4_TRYCR	4	0.271	0.7	0.546	149000000000	ZC3H15/TMA46 family C-terminal domain-containing protein OS=Trypanosoma cruzi Dm28c OX=1416333 GN=TCDM_03265 PE=4 SV=1
tr|V5BQT5|V5BQT5_TRYCR	6	0.328	0.57	0.633	294000000000	rRNA biogenesis protein OS=Trypanosoma cruzi Dm28c OX=1416333 GN=TCDM_01003 PE=4 SV=1
tr|V5D7E1|V5D7E1_TRYCR	3	0.208	0.54	0.416	7960000000	Double-strand-break repair protein rad21 OS=Trypanosoma cruzi Dm28c OX=1416333 GN=TCDM_08781 PE=3 SV=1
tr|V5AW13|V5AW13_TRYCR	6	0.195	0.56	0.585	148000000000	Regulatory subunit of protein kinase a-like protein OS=Trypanosoma cruzi Dm28c OX=1416333 GN=TCDM_06738 PE=4 SV=1
tr|V5DKX4|V5DKX4_TRYCR	4	0.649	0.71	0.675	78000000000	Conserved oligomeric Golgi complex subunit 3 OS=Trypanosoma cruzi Dm28c OX=1416333 GN=TCDM_03180 PE=3 SV=1
tr|V5BPT7|V5BPT7_TRYCR	6	0.444	0.58	0.675	48800000000	Uncharacterized protein OS=Trypanosoma cruzi Dm28c OX=1416333 GN=TCDM_03152 PE=4 SV=1
tr|V5B752|V5B752_TRYCR	6	0.114	0.67	0.595	8280000000	non-specific serine/threonine protein kinase OS=Trypanosoma cruzi Dm28c OX=1416333 GN=TCDM_02063 PE=4 SV=1
tr|V5BRU6|V5BRU6_TRYCR	4	0.132	0.62	0.473	642000000	Gamma-soluble NSF attachment protein OS=Trypanosoma cruzi Dm28c OX=1416333 GN=TCDM_04074 PE=3 SV=1
tr|V5ARR6|V5ARR6_TRYCR	6	0.137	0.57	0.569	9980000000	AB hydrolase-1 domain-containing protein OS=Trypanosoma cruzi Dm28c OX=1416333 GN=TCDM_08684 PE=4 SV=1
tr|V5DDY4|V5DDY4_TRYCR	3	0.289	0.6	0.463	12200000000	Inosine-guanine nucleoside hydrolase OS=Trypanosoma cruzi Dm28c OX=1416333 GN=TCDM_05892 PE=3 SV=1
tr|V5BML0|V5BML0_TRYCR	6	0.408	0.85	0.753	41800000000	WW domain-containing protein OS=Trypanosoma cruzi Dm28c OX=1416333 GN=TCDM_03838 PE=4 SV=1
tr|V5D783|V5D783_TRYCR	5	0.04	0.6	0.491	28000000000	procollagen-proline 4-dioxygenase OS=Trypanosoma cruzi Dm28c OX=1416333 GN=TCDM_08879 PE=4 SV=1
tr|V5B765|V5B765_TRYCR	4	0.167	0.65	0.495	8240000000	MIF4G domain-containing protein OS=Trypanosoma cruzi Dm28c OX=1416333 GN=TCDM_02079 PE=3 SV=1
tr|V5B1Q7|V5B1Q7_TRYCR	4	0.022	0.62	0.436	14400000000	Ancestral coatomer element 1 Sec16/Sec31 domain-containing protein OS=Trypanosoma cruzi Dm28c OX=1416333 GN=TCDM_04297 PE=3 SV=1
tr|V5DF06|V5DF06_TRYCR	4	0.332	0.64	0.546	20000000000	Protein kinase OS=Trypanosoma cruzi Dm28c OX=1416333 GN=TCDM_05504 PE=4 SV=1
tr|V5B7P7|V5B7P7_TRYCR	3	0.108	0.6	0.403	3930000000	Uncharacterized protein OS=Trypanosoma cruzi Dm28c OX=1416333 GN=TCDM_02043 PE=4 SV=1
tr|V5BEJ7|V5BEJ7_TRYCR	6	0.165	0.61	0.592	122000000000	DDH domain-containing protein OS=Trypanosoma cruzi Dm28c OX=1416333 GN=TCDM_09439 PE=4 SV=1
tr|V5BG13|V5BG13_TRYCR	4	0.082	0.58	0.443	40600000000	Uncharacterized protein OS=Trypanosoma cruzi Dm28c OX=1416333 GN=TCDM_04638 PE=4 SV=1
tr|V5BB90|V5BB90_TRYCR	6	0.104	0.67	0.591	7570000000	Dihydrolipoamide dehydrogenase OS=Trypanosoma cruzi Dm28c OX=1416333 GN=TCDM_10743 PE=3 SV=1
tr|V5BY96|V5BY96_TRYCR	6	0.265	0.59	0.618	217000000000	K Homology domain-containing protein OS=Trypanosoma cruzi Dm28c OX=1416333 GN=TCDM_14040 PE=3 SV=1
tr|V5DMB5|V5DMB5_TRYCR	6	0.22	0.57	0.597	170000000000	RRM domain-containing protein OS=Trypanosoma cruzi Dm28c OX=1416333 GN=TCDM_02685 PE=4 SV=1
tr|V5BVQ0|V5BVQ0_TRYCR	3	0.239	0.56	0.433	948000000	RNA-binding protein 38 OS=Trypanosoma cruzi Dm28c OX=1416333 GN=TCDM_00749 PE=4 SV=1
tr|V5B1S3|V5B1S3_TRYCR	3	0.449	0.66	0.536	249000000000	Uncharacterized protein OS=Trypanosoma cruzi Dm28c OX=1416333 GN=TCDM_14387 PE=4 SV=1
tr|V5BR99|V5BR99_TRYCR	2	0.124	0.51	0.322	2990000000	Uncharacterized protein OS=Trypanosoma cruzi Dm28c OX=1416333 GN=TCDM_04295 PE=4 SV=1
tr|V5BGK9|V5BGK9_TRYCR	6	0.278	0.54	0.606	23200000000	E2 ubiquitin-conjugating enzyme OS=Trypanosoma cruzi Dm28c OX=1416333 GN=TCDM_04407 PE=3 SV=1
tr|V5B8T7|V5B8T7_TRYCR	6	0.372	0.57	0.647	359000000000	Glutaredoxin-like protein OS=Trypanosoma cruzi Dm28c OX=1416333 GN=TCDM_13878 PE=4 SV=1
tr|V5AL94|V5AL94_TRYCR	4	0.202	0.55	0.473	102000000000	Trichohyalin OS=Trypanosoma cruzi Dm28c OX=1416333 GN=TCDM_10949 PE=4 SV=1
tr|V5DQF8|V5DQF8_TRYCR	4	0.117	0.66	0.481	5660000000	GTP-binding protein OS=Trypanosoma cruzi Dm28c OX=1416333 GN=TCDM_01651 PE=4 SV=1
tr|V5BU03|V5BU03_TRYCR	6	0.124	0.61	0.578	9000000000	Uncharacterized protein OS=Trypanosoma cruzi Dm28c OX=1416333 GN=TCDM_03164 PE=4 SV=1
tr|V5BZC0|V5BZC0_TRYCR	6	0.121	0.61	0.577	8760000000	Uncharacterized protein OS=Trypanosoma cruzi Dm28c OX=1416333 GN=TCDM_01337 PE=3 SV=1
tr|V5DRQ0|V5DRQ0_TRYCR	5	0.279	0.59	0.567	194000000000	Uncharacterized protein OS=Trypanosoma cruzi Dm28c OX=1416333 GN=TCDM_01188 PE=4 SV=1
tr|V5AUU9|V5AUU9_TRYCR	3	0.233	0.63	0.454	9150000000	Uncharacterized protein OS=Trypanosoma cruzi Dm28c OX=1416333 GN=TCDM_07313 PE=4 SV=1
tr|V5BMT1|V5BMT1_TRYCR	4	0.156	0.68	0.501	7650000000	Uncharacterized protein OS=Trypanosoma cruzi Dm28c OX=1416333 GN=TCDM_05681 PE=4 SV=1
tr|V5BP35|V5BP35_TRYCR	6	0.2	0.61	0.603	151000000000	Chaperonin HSP60 OS=Trypanosoma cruzi Dm28c OX=1416333 GN=TCDM_05098 PE=3 SV=1
tr|V5BVM4|V5BVM4_TRYCR	6	0.385	0.6	0.662	37900000000	Importin N-terminal domain-containing protein OS=Trypanosoma cruzi Dm28c OX=1416333 GN=TCDM_02743 PE=4 SV=1
tr|V5AR46|V5AR46_TRYCR	6	0.109	0.63	0.58	7890000000	RNA polymerase II-associated protein 3 OS=Trypanosoma cruzi Dm28c OX=1416333 GN=TCDM_14205 PE=3 SV=1
tr|V5BZW6|V5BZW6_TRYCR	6	0.968	0.74	0.903	0.00134477	Uncharacterized protein OS=Trypanosoma cruzi Dm28c OX=1416333 GN=TCDM_01161 PE=4 SV=1
tr|V5BMI7|V5BMI7_TRYCR	5	0.067	0.66	0.52	4250000000	TRAF-type domain-containing protein OS=Trypanosoma cruzi Dm28c OX=1416333 GN=TCDM_05822 PE=4 SV=1
tr|V5DCZ6|V5DCZ6_TRYCR	4	0.146	0.6	0.471	7110000000	Zinc finger protein OS=Trypanosoma cruzi Dm28c OX=1416333 GN=TCDM_06360 PE=4 SV=1
tr|V5BI00|V5BI00_TRYCR	2	0.034	0.54	0.302	993000000	Elongation factor 2 OS=Trypanosoma cruzi Dm28c OX=1416333 GN=TCDM_04009 PE=4 SV=1
tr|V5BEY0|V5BEY0_TRYCR	2	0.038	0.54	0.304	10800000000	Mitochondrial RNA binding complex 1 subunit OS=Trypanosoma cruzi Dm28c OX=1416333 GN=TCDM_07341 PE=4 SV=1
tr|V5BNV6|V5BNV6_TRYCR	2	0.466	0.54	0.446	179000000000	WW domain-containing protein OS=Trypanosoma cruzi Dm28c OX=1416333 GN=TCDM_05131 PE=4 SV=1
tr|V5ASU9|V5ASU9_TRYCR	5	0.588	0.83	0.75	74700000000	Poly(A)-specific ribonuclease PARN OS=Trypanosoma cruzi Dm28c OX=1416333 GN=TCDM_08160 PE=3 SV=1
tr|V5BL87|V5BL87_TRYCR	5	0.229	0.63	0.564	14900000000	MsrB domain-containing protein OS=Trypanosoma cruzi Dm28c OX=1416333 GN=TCDM_06423 PE=3 SV=1
tr|V5AUN4|V5AUN4_TRYCR	4	0.078	0.6	0.448	388000000	Ribosomal P protein AGP2beta-1 OS=Trypanosoma cruzi Dm28c OX=1416333 GN=TCDM_12676 PE=4 SV=1
tr|V5AYR4|V5AYR4_TRYCR	4	0.146	0.63	0.481	7130000000	MSP domain-containing protein OS=Trypanosoma cruzi Dm28c OX=1416333 GN=TCDM_05502 PE=4 SV=1
tr|V5AWI7|V5AWI7_TRYCR	3	0.078	0.67	0.416	2910000000	Uncharacterized protein OS=Trypanosoma cruzi Dm28c OX=1416333 GN=TCDM_06524 PE=4 SV=1
tr|V5B903|V5B903_TRYCR	4	0.122	0.57	0.453	58800000000	non-specific serine/threonine protein kinase OS=Trypanosoma cruzi Dm28c OX=1416333 GN=TCDM_01452 PE=3 SV=1
tr|V5B520|V5B520_TRYCR	6	0.203	0.59	0.598	154000000000	Uncharacterized protein OS=Trypanosoma cruzi Dm28c OX=1416333 GN=TCDM_02888 PE=3 SV=1
tr|V5AQU0|V5AQU0_TRYCR	4	0.16	0.63	0.486	7840000000	Uncharacterized protein OS=Trypanosoma cruzi Dm28c OX=1416333 GN=TCDM_09124 PE=4 SV=1
tr|V5BMY3|V5BMY3_TRYCR	6	0.116	0.74	0.619	8410000000	C3H1-type domain-containing protein OS=Trypanosoma cruzi Dm28c OX=1416333 GN=TCDM_05617 PE=4 SV=1
tr|V5C2R5|V5C2R5_TRYCR	1	0.447	0	0.205	8260000000	U5 snRNA-associated splicing factor OS=Trypanosoma cruzi Dm28c OX=1416333 GN=TCDM_00096 PE=4 SV=1
tr|V5AUA2|V5AUA2_TRYCR	4	0.082	0.58	0.443	4030000000	C2H2-type domain-containing protein OS=Trypanosoma cruzi Dm28c OX=1416333 GN=TCDM_07522 PE=4 SV=1
tr|V5DCC0|V5DCC0_TRYCR	6	0.165	0.58	0.582	122000000000	Cytidyltransferase-like domain-containing protein OS=Trypanosoma cruzi Dm28c OX=1416333 GN=TCDM_06687 PE=4 SV=1
tr|V5B205|V5B205_TRYCR	4	0.094	0.65	0.47	458000000	Uncharacterized protein OS=Trypanosoma cruzi Dm28c OX=1416333 GN=TCDM_10840 PE=4 SV=1
tr|V5BC62|V5BC62_TRYCR	4	0.159	0.59	0.472	7790000000	START domain-containing protein OS=Trypanosoma cruzi Dm28c OX=1416333 GN=TCDM_00306 PE=4 SV=1
tr|V5D7M8|V5D7M8_TRYCR	6	0.175	0.69	0.622	130000000000	Protein arginine methyltransferase NDUFAF7 OS=Trypanosoma cruzi Dm28c OX=1416333 GN=TCDM_08730 PE=3 SV=1
tr|V5BMI4|V5BMI4_TRYCR	2	0.648	0.73	0.57	38900000000	B30,2/SPRY domain-containing protein OS=Trypanosoma cruzi Dm28c OX=1416333 GN=TCDM_05815 PE=4 SV=1
tr|V5CZ20|V5CZ20_TRYCR	3	0.12	0.58	0.4	4350000000	Protein kinase OS=Trypanosoma cruzi Dm28c OX=1416333 GN=TCDM_11995 PE=4 SV=1
tr|V5DG08|V5DG08_TRYCR	4	0.782	0.75	0.733	0.000151042	Uncharacterized protein OS=Trypanosoma cruzi Dm28c OX=1416333 GN=TCDM_04991 PE=4 SV=1
tr|V5D960|V5D960_TRYCR	2	0.231	0.63	0.398	6040000000	Uncharacterized protein OS=Trypanosoma cruzi Dm28c OX=1416333 GN=TCDM_08022 PE=4 SV=1
tr|V5D1D7|V5D1D7_TRYCR	6	0.451	0.66	0.704	50400000000	Uncharacterized protein OS=Trypanosoma cruzi Dm28c OX=1416333 GN=TCDM_11147 PE=4 SV=1
tr|V5BCQ7|V5BCQ7_TRYCR	2	0.096	0.56	0.33	23400000000	Mucin-associated surface protein (MASP) OS=Trypanosoma cruzi Dm28c OX=1416333 GN=TCDM_06099 PE=4 SV=1
tr|V5BM44|V5BM44_TRYCR	4	0.16	0.68	0.502	7830000000	Calmodulin OS=Trypanosoma cruzi Dm28c OX=1416333 GN=TCDM_14377 PE=4 SV=1
tr|V5B6X9|V5B6X9_TRYCR	2	0.178	0.54	0.35	4420000000	Bromo domain-containing protein OS=Trypanosoma cruzi Dm28c OX=1416333 GN=TCDM_02277 PE=4 SV=1
tr|V5BJH3|V5BJH3_TRYCR	6	0.223	0.58	0.601	173000000000	Zinc-finger protein ZPR1 OS=Trypanosoma cruzi Dm28c OX=1416333 GN=TCDM_05177 PE=3 SV=1
tr|V5B7C6|V5B7C6_TRYCR	6	0.909	0.9	0.936	0.000570757	RNA-binding protein OS=Trypanosoma cruzi Dm28c OX=1416333 GN=TCDM_13974 PE=4 SV=1
tr|V5BT79|V5BT79_TRYCR	2	0.022	0.65	0.335	706000000	PIH1 domain-containing protein 1 OS=Trypanosoma cruzi Dm28c OX=1416333 GN=TCDM_00043 PE=3 SV=1
tr|V5BFT5|V5BFT5_TRYCR	4	0.145	0.61	0.474	7080000000	Uncharacterized protein OS=Trypanosoma cruzi Dm28c OX=1416333 GN=TCDM_04821 PE=4 SV=1
tr|V5BIH0|V5BIH0_TRYCR	6	0.149	0.57	0.573	109000000000	RING-type E3 ubiquitin transferase OS=Trypanosoma cruzi Dm28c OX=1416333 GN=TCDM_03797 PE=4 SV=1
tr|V5B593|V5B593_TRYCR	4	0.16	0.6	0.476	7820000000	Methyltransferase-like protein OS=Trypanosoma cruzi Dm28c OX=1416333 GN=TCDM_02769 PE=3 SV=1
tr|V5DT71|V5DT71_TRYCR	3	0.102	0.7	0.434	37200000000	MIT domain-containing protein OS=Trypanosoma cruzi Dm28c OX=1416333 GN=TCDM_13932 PE=4 SV=1
tr|V5C0H7|V5C0H7_TRYCR	6	0.233	0.74	0.658	18400000000	SUI1 domain-containing protein OS=Trypanosoma cruzi Dm28c OX=1416333 GN=TCDM_00752 PE=3 SV=1
tr|V5B266|V5B266_TRYCR	4	0.168	0.63	0.488	8290000000	Uncharacterized protein OS=Trypanosoma cruzi Dm28c OX=1416333 GN=TCDM_04041 PE=4 SV=1
tr|V5BJK0|V5BJK0_TRYCR	2	0.064	0.51	0.302	16400000000	PSP1 C-terminal domain-containing protein OS=Trypanosoma cruzi Dm28c OX=1416333 GN=TCDM_05057 PE=4 SV=1
tr|V5AR05|V5AR05_TRYCR	2	0.186	0.57	0.363	4640000000	Epsilon tubulin OS=Trypanosoma cruzi Dm28c OX=1416333 GN=TCDM_09025 PE=3 SV=1
tr|V5BVW6|V5BVW6_TRYCR	2	0.074	0.67	0.359	1850000000	Uncharacterized protein OS=Trypanosoma cruzi Dm28c OX=1416333 GN=TCDM_02618 PE=4 SV=1
tr|V5AUW3|V5AUW3_TRYCR	4	0.17	0.57	0.469	839000000	Serine/threonine-protein phosphatase OS=Trypanosoma cruzi Dm28c OX=1416333 GN=TCDM_07329 PE=3 SV=1
tr|V5BR47|V5BR47_TRYCR	6	0.178	0.61	0.596	133000000000	Uncharacterized protein OS=Trypanosoma cruzi Dm28c OX=1416333 GN=TCDM_14310 PE=4 SV=1
tr|V5BFJ0|V5BFJ0_TRYCR	6	0.202	0.55	0.584	153000000000	Uncharacterized protein OS=Trypanosoma cruzi Dm28c OX=1416333 GN=TCDM_09034 PE=4 SV=1
tr|V5C2N5|V5C2N5_TRYCR	5	0.047	0.71	0.53	31700000000	R3H domain-containing protein OS=Trypanosoma cruzi Dm28c OX=1416333 GN=TCDM_00042 PE=4 SV=1
tr|V5AQT6|V5AQT6_TRYCR	3	0.14	0.57	0.403	5100000000	GDP-L-fucose synthase OS=Trypanosoma cruzi Dm28c OX=1416333 GN=TCDM_09119 PE=3 SV=1
tr|V5BA74|V5BA74_TRYCR	5	0.05	0.66	0.514	33100000000	DnaJ chaperone protein OS=Trypanosoma cruzi Dm28c OX=1416333 GN=TCDM_00922 PE=4 SV=1
tr|V5BT94|V5BT94_TRYCR	4	0.049	0.65	0.455	26300000000	Elongation factor 1-alpha (Ef-1-alpha) OS=Trypanosoma cruzi Dm28c OX=1416333 GN=TCDM_00066 PE=4 SV=1
tr|V5ATD3|V5ATD3_TRYCR	4	0.188	0.74	0.532	944000000	Formin like proteiny 2 (FH2) domain protein OS=Trypanosoma cruzi Dm28c OX=1416333 GN=TCDM_07992 PE=4 SV=1
tr|V5DNV4|V5DNV4_TRYCR	4	0.175	0.71	0.517	8690000000	S-adenosylmethionine decarboxylase proenzyme OS=Trypanosoma cruzi Dm28c OX=1416333 GN=TCDM_02116 PE=3 SV=1
tr|V5BC39|V5BC39_TRYCR	2	0.125	0.52	0.326	3040000000	tRNA (adenine(58)-N(1))-methyltransferase OS=Trypanosoma cruzi Dm28c OX=1416333 GN=TCDM_06390 PE=3 SV=1
tr|V5BSL0|V5BSL0_TRYCR	1	0.306	0	0.158	4420000000	Uncharacterized protein OS=Trypanosoma cruzi Dm28c OX=1416333 GN=TCDM_00292 PE=4 SV=1
tr|V5BVS1|V5BVS1_TRYCR	4	0.091	0.65	0.469	4440000000	E2 ubiquitin-conjugating enzyme OS=Trypanosoma cruzi Dm28c OX=1416333 GN=TCDM_02539 PE=3 SV=1
tr|V5DBU7|V5DBU7_TRYCR	4	0.22	0.64	0.509	113000000000	C3H1-type domain-containing protein OS=Trypanosoma cruzi Dm28c OX=1416333 GN=TCDM_06841 PE=4 SV=1
tr|V5ATM8|V5ATM8_TRYCR	4	0.254	0.76	0.56	136000000000	F-box domain-containing protein OS=Trypanosoma cruzi Dm28c OX=1416333 GN=TCDM_07859 PE=4 SV=1
tr|V5DEE3|V5DEE3_TRYCR	2	0.292	0.67	0.432	8280000000	Uncharacterized protein OS=Trypanosoma cruzi Dm28c OX=1416333 GN=TCDM_05644 PE=4 SV=1
tr|V5ARY9|V5ARY9_TRYCR	5	0.13	0.61	0.524	7870000000	Serine/threonine protein phosphatase OS=Trypanosoma cruzi Dm28c OX=1416333 GN=TCDM_08628 PE=4 SV=1
tr|V5C1N9|V5C1N9_TRYCR	4	0.087	0.64	0.465	4270000000	Uncharacterized protein OS=Trypanosoma cruzi Dm28c OX=1416333 GN=TCDM_00445 PE=3 SV=1
tr|V5BM10|V5BM10_TRYCR	6	0.375	0.78	0.718	36300000000	Mitochondrial DNA polymerase I protein D OS=Trypanosoma cruzi Dm28c OX=1416333 GN=TCDM_04104 PE=4 SV=1
tr|V5BBJ9|V5BBJ9_TRYCR	2	0.541	0.72	0.531	245000000000	Kinesin OS=Trypanosoma cruzi Dm28c OX=1416333 GN=TCDM_06668 PE=4 SV=1
tr|V5BKE3|V5BKE3_TRYCR	4	0.167	0.65	0.495	8250000000	Uncharacterized protein OS=Trypanosoma cruzi Dm28c OX=1416333 GN=TCDM_13851 PE=4 SV=1
tr|V5BAV6|V5BAV6_TRYCR	4	0.121	0.67	0.486	5840000000	HMG box domain-containing protein OS=Trypanosoma cruzi Dm28c OX=1416333 GN=TCDM_07010 PE=3 SV=1
tr|V5DLG0|V5DLG0_TRYCR	5	0.049	0.64	0.507	3250000000	NAD-dependent epimerase/dehydratase domain-containing protein OS=Trypanosoma cruzi Dm28c OX=1416333 GN=TCDM_03032 PE=4 SV=1
tr|V5BPT0|V5BPT0_TRYCR	4	0.083	0.55	0.433	4080000000	Actin-related protein 3 OS=Trypanosoma cruzi Dm28c OX=1416333 GN=TCDM_03139 PE=3 SV=1
tr|V5B6Z1|V5B6Z1_TRYCR	6	0.105	0.61	0.572	7610000000	Ubiquitin activating E1 enzyme OS=Trypanosoma cruzi Dm28c OX=1416333 GN=TCDM_13871 PE=4 SV=1
tr|V5ARK5|V5ARK5_TRYCR	2	0.218	0.68	0.41	5610000000	Protein FAM184A/B N-terminal domain-containing protein OS=Trypanosoma cruzi Dm28c OX=1416333 GN=TCDM_08766 PE=4 SV=1
tr|V5BZ70|V5BZ70_TRYCR	4	0.15	0.59	0.469	7310000000	RRM domain-containing protein OS=Trypanosoma cruzi Dm28c OX=1416333 GN=TCDM_01271 PE=4 SV=1
tr|V5BIY9|V5BIY9_TRYCR	3	0.275	0.63	0.468	114000000000	Uncharacterized protein OS=Trypanosoma cruzi Dm28c OX=1416333 GN=TCDM_07451 PE=4 SV=1
tr|V5BWE0|V5BWE0_TRYCR	4	0.086	0.65	0.468	4230000000	Mucin TcMUCII OS=Trypanosoma cruzi Dm28c OX=1416333 GN=TCDM_02388 PE=4 SV=1
tr|V5BB76|V5BB76_TRYCR	2	0.136	0.72	0.396	33000000000	STAS domain-containing protein OS=Trypanosoma cruzi Dm28c OX=1416333 GN=TCDM_08912 PE=3 SV=1
tr|V5BAY1|V5BAY1_TRYCR	4	0.08	0.55	0.432	3950000000	RRM domain-containing protein OS=Trypanosoma cruzi Dm28c OX=1416333 GN=TCDM_06951 PE=4 SV=1
tr|V5DQ92|V5DQ92_TRYCR	2	0.504	0.6	0.479	209000000000	Putative dynein heavy chain OS=Trypanosoma cruzi Dm28c OX=1416333 GN=TCDM_01539 PE=4 SV=1
tr|V5BPJ5|V5BPJ5_TRYCR	3	0.073	0.58	0.384	27300000000	Uncharacterized protein OS=Trypanosoma cruzi Dm28c OX=1416333 GN=TCDM_03217 PE=4 SV=1
tr|V5BRU2|V5BRU2_TRYCR	4	0.122	0.6	0.463	5910000000	MIF4G domain-containing protein OS=Trypanosoma cruzi Dm28c OX=1416333 GN=TCDM_00683 PE=4 SV=1
tr|V5B6K4|V5B6K4_TRYCR	2	0.935	0.72	0.663	0.000255992	Uncharacterized protein OS=Trypanosoma cruzi Dm28c OX=1416333 GN=TCDM_02392 PE=4 SV=1
tr|V5BF40|V5BF40_TRYCR	1	0.251	0	0.139	33700000000	GRIP domain-containing protein OS=Trypanosoma cruzi Dm28c OX=1416333 GN=TCDM_07171 PE=4 SV=1
tr|V5BVR1|V5BVR1_TRYCR	1	0.485	0	0.217	9690000000	Uncharacterized protein OS=Trypanosoma cruzi Dm28c OX=1416333 GN=TCDM_02518 PE=4 SV=1
tr|V5C320|V5C320_TRYCR	4	0.279	0.64	0.529	155000000000	Heat shock factor binding protein 1 OS=Trypanosoma cruzi Dm28c OX=1416333 GN=TCDM_13795 PE=3 SV=1
tr|V5DB11|V5DB11_TRYCR	2	0.112	0.63	0.358	27200000000	Uncharacterized protein OS=Trypanosoma cruzi Dm28c OX=1416333 GN=TCDM_13861 PE=4 SV=1
tr|V5D2J6|V5D2J6_TRYCR	2	0.083	0.64	0.352	20500000000	RecQ-mediated genome instability protein 1 OS=Trypanosoma cruzi Dm28c OX=1416333 GN=TCDM_10699 PE=3 SV=1
tr|V5BC20|V5BC20_TRYCR	4	0.084	0.59	0.447	4130000000	Uncharacterized protein OS=Trypanosoma cruzi Dm28c OX=1416333 GN=TCDM_08564 PE=4 SV=1
tr|V5AU30|V5AU30_TRYCR	2	0.022	0.66	0.338	72300000	Zorya protein ZorC EH domain-containing protein OS=Trypanosoma cruzi Dm28c OX=1416333 GN=TCDM_07626 PE=4 SV=1
tr|V5BHR1|V5BHR1_TRYCR	2	0.038	0.57	0.314	10800000000	ENTH domain-containing protein OS=Trypanosoma cruzi Dm28c OX=1416333 GN=TCDM_04063 PE=4 SV=1
tr|V5BFA7|V5BFA7_TRYCR	2	0.016	0.52	0.29	566000000	Proteasome assembly chaperone 3 OS=Trypanosoma cruzi Dm28c OX=1416333 GN=TCDM_14316 PE=4 SV=1
tr|V5BNK6|V5BNK6_TRYCR	2	0.06	0.66	0.351	15400000000	Guanine nucleotide-binding protein subunit beta-like protein OS=Trypanosoma cruzi Dm28c OX=1416333 GN=TCDM_05251 PE=4 SV=1
tr|V5DEF7|V5DEF7_TRYCR	2	0.173	0.69	0.399	4280000000	Uncharacterized protein OS=Trypanosoma cruzi Dm28c OX=1416333 GN=TCDM_05665 PE=4 SV=1
tr|V5DRZ7|V5DRZ7_TRYCR	2	0.072	0.57	0.325	18100000000	PPIase cyclophilin-type domain-containing protein OS=Trypanosoma cruzi Dm28c OX=1416333 GN=TCDM_00955 PE=4 SV=1
tr|V5B915|V5B915_TRYCR	6	0.119	0.59	0.57	8660000000	Histone chaperone ASF1B OS=Trypanosoma cruzi Dm28c OX=1416333 GN=TCDM_13915 PE=3 SV=1
tr|V5B9B0|V5B9B0_TRYCR	2	0.024	0.56	0.306	764000000	C3H1-type domain-containing protein OS=Trypanosoma cruzi Dm28c OX=1416333 GN=TCDM_01281 PE=4 SV=1
tr|V5B9D8|V5B9D8_TRYCR	2	0.049	0.54	0.307	13100000000	Uncharacterized protein OS=Trypanosoma cruzi Dm28c OX=1416333 GN=TCDM_01317 PE=4 SV=1
tr|V5D5P4|V5D5P4_TRYCR	2	0.021	0.66	0.338	684000000	Hd phosphohydrolase family protein OS=Trypanosoma cruzi Dm28c OX=1416333 GN=TCDM_09497 PE=4 SV=1
tr|V5DMH3|V5DMH3_TRYCR	2	0.04	0.52	0.298	11200000000	Dynamin N-terminal domain-containing protein OS=Trypanosoma cruzi Dm28c OX=1416333 GN=TCDM_02522 PE=4 SV=1
tr|V5BYY0|V5BYY0_TRYCR	2	0.033	0.64	0.335	95400000	Uncharacterized protein OS=Trypanosoma cruzi Dm28c OX=1416333 GN=TCDM_01449 PE=4 SV=1
tr|V5DKG4|V5DKG4_TRYCR	3	0.147	0.6	0.416	5360000000	RNA 3'-terminal phosphate cyclase-like protein OS=Trypanosoma cruzi Dm28c OX=1416333 GN=TCDM_03424 PE=3 SV=1
tr|V5B9P3|V5B9P3_TRYCR	6	0.06	0.65	0.57	4650000000	NUDIX hydrolase OS=Trypanosoma cruzi Dm28c OX=1416333 GN=TCDM_07617 PE=4 SV=1
tr|V5BCE0|V5BCE0_TRYCR	6	0.293	0.61	0.634	25000000000	Serine aminopeptidase S33 domain-containing protein OS=Trypanosoma cruzi Dm28c OX=1416333 GN=TCDM_06305 PE=4 SV=1
tr|V5BED6|V5BED6_TRYCR	2	0.036	0.63	0.333	10300000000	RNA-binding protein 4 OS=Trypanosoma cruzi Dm28c OX=1416333 GN=TCDM_05326 PE=4 SV=1
tr|V5DKF7|V5DKF7_TRYCR	6	0.059	0.56	0.54	4550000000	Thiopurine S-methyltransferase OS=Trypanosoma cruzi Dm28c OX=1416333 GN=TCDM_03419 PE=4 SV=1
tr|V5D978|V5D978_TRYCR	2	0.81	0.73	0.624	89300000000	Dynein heavy chain OS=Trypanosoma cruzi Dm28c OX=1416333 GN=TCDM_08047 PE=4 SV=1
tr|V5BKJ3|V5BKJ3_TRYCR	2	0.004	0.59	0.309	2370000000	Protein kinase OS=Trypanosoma cruzi Dm28c OX=1416333 GN=TCDM_04752 PE=4 SV=1
tr|V5D565|V5D565_TRYCR	2	0.201	0.68	0.405	5080000000	Exosome-associated protein 1 OS=Trypanosoma cruzi Dm28c OX=1416333 GN=TCDM_09755 PE=3 SV=1
tr|V5BBA9|V5BBA9_TRYCR	2	0.033	0.58	0.315	963000000	Tudor domain-containing protein OS=Trypanosoma cruzi Dm28c OX=1416333 GN=TCDM_06810 PE=4 SV=1
tr|V5BCN7|V5BCN7_TRYCR	1	0.306	0	0.158	44300000000	SURP motif domain-containing protein OS=Trypanosoma cruzi Dm28c OX=1416333 GN=TCDM_10206 PE=4 SV=1
tr|V5BCA8|V5BCA8_TRYCR	2	0.058	0.54	0.31	14900000000	Uncharacterized protein OS=Trypanosoma cruzi Dm28c OX=1416333 GN=TCDM_06256 PE=4 SV=1
tr|V5AZ19|V5AZ19_TRYCR	6	0.171	0.63	0.6	12700000000	Actin-related protein 2 OS=Trypanosoma cruzi Dm28c OX=1416333 GN=TCDM_05333 PE=3 SV=1
tr|V5B0A5|V5B0A5_TRYCR	4	0.033	0.62	0.44	1910000000	UDP-glucose 6-dehydrogenase OS=Trypanosoma cruzi Dm28c OX=1416333 GN=TCDM_04774 PE=3 SV=1
tr|V5BB96|V5BB96_TRYCR	1	0.626	0	0.264	17600000000	Myosin heavy chain OS=Trypanosoma cruzi Dm28c OX=1416333 GN=TCDM_08875 PE=3 SV=1
tr|V5BC84|V5BC84_TRYCR	2	0.019	0.53	0.294	637000000	C2H2-type domain-containing protein OS=Trypanosoma cruzi Dm28c OX=1416333 GN=TCDM_06345 PE=3 SV=1
tr|V5BQT7|V5BQT7_TRYCR	2	0.069	0.59	0.331	1730000000	RNA uridylyltransferase OS=Trypanosoma cruzi Dm28c OX=1416333 GN=TCDM_01010 PE=4 SV=1
tr|V5AWF3|V5AWF3_TRYCR	2	0.015	0.71	0.353	556000000	G10 protein OS=Trypanosoma cruzi Dm28c OX=1416333 GN=TCDM_06572 PE=3 SV=1
tr|V5AZU7|V5AZU7_TRYCR	4	0.372	0.76	0.6	239000000000	nicotinate phosphoribosyltransferase OS=Trypanosoma cruzi Dm28c OX=1416333 GN=TCDM_04910 PE=3 SV=1
tr|V5B971|V5B971_TRYCR	2	0.01	0.62	0.321	4260000000	HD domain-containing protein OS=Trypanosoma cruzi Dm28c OX=1416333 GN=TCDM_09794 PE=4 SV=1
tr|V5BQK6|V5BQK6_TRYCR	4	0.202	0.62	0.496	103000000000	PUB domain-containing protein OS=Trypanosoma cruzi Dm28c OX=1416333 GN=TCDM_01233 PE=4 SV=1
tr|V5BIJ5|V5BIJ5_TRYCR	2	0.039	0.51	0.294	110000000	C2H2-type domain-containing protein OS=Trypanosoma cruzi Dm28c OX=1416333 GN=TCDM_05555 PE=4 SV=1
tr|V5BB49|V5BB49_TRYCR	2	0.019	0.58	0.311	653000000	Chromatin binding protein OS=Trypanosoma cruzi Dm28c OX=1416333 GN=TCDM_00622 PE=4 SV=1
tr|V5BSW5|V5BSW5_TRYCR	2	0.184	0.53	0.349	4590000000	Cleavage and polyadenylation specificity factor subunit 2 OS=Trypanosoma cruzi Dm28c OX=1416333 GN=TCDM_02045 PE=3 SV=1
tr|V5BLW4|V5BLW4_TRYCR	2	0.083	0.71	0.375	20400000000	non-specific serine/threonine protein kinase OS=Trypanosoma cruzi Dm28c OX=1416333 GN=TCDM_04221 PE=3 SV=1
tr|V5B3F7|V5B3F7_TRYCR	5	0.406	0.85	0.696	34600000000	Hydroxymethylglutaryl-CoA lyase OS=Trypanosoma cruzi Dm28c OX=1416333 GN=TCDM_03612 PE=4 SV=1
tr|V5DKP0|V5DKP0_TRYCR	3	0.032	0.56	0.364	14100000000	Arp2/3 complex 34 kDa subunit OS=Trypanosoma cruzi Dm28c OX=1416333 GN=TCDM_03297 PE=3 SV=1
tr|V5D7H9|V5D7H9_TRYCR	4	0.045	0.63	0.447	2460000000	Kinesin-like protein OS=Trypanosoma cruzi Dm28c OX=1416333 GN=TCDM_08777 PE=3 SV=1
tr|V5BF17|V5BF17_TRYCR	2	0.145	0.52	0.333	35300000000	Cytoskeleton associated protein OS=Trypanosoma cruzi Dm28c OX=1416333 GN=TCDM_07220 PE=4 SV=1
tr|V5DG78|V5DG78_TRYCR	2	0.828	0.55	0.57	99900000000	Uncharacterized protein OS=Trypanosoma cruzi Dm28c OX=1416333 GN=TCDM_04924 PE=4 SV=1
tr|V5DJQ1|V5DJQ1_TRYCR	2	0.024	0.5	0.286	768000000	RRM domain-containing protein OS=Trypanosoma cruzi Dm28c OX=1416333 GN=TCDM_03703 PE=4 SV=1
tr|V5DF84|V5DF84_TRYCR	2	0.223	0.54	0.365	5790000000	Uncharacterized protein OS=Trypanosoma cruzi Dm28c OX=1416333 GN=TCDM_05427 PE=4 SV=1
tr|V5B677|V5B677_TRYCR	4	0.076	0.55	0.431	37800000000	PX domain-containing protein OS=Trypanosoma cruzi Dm28c OX=1416333 GN=TCDM_02454 PE=4 SV=1
tr|V5BHN9|V5BHN9_TRYCR	4	0.726	0.75	0.714	0.000112307	EF-hand domain-containing protein OS=Trypanosoma cruzi Dm28c OX=1416333 GN=TCDM_05979 PE=4 SV=1
tr|V5BGH1|V5BGH1_TRYCR	1	0.638	0	0.268	185000000000	Trichohyalin OS=Trypanosoma cruzi Dm28c OX=1416333 GN=TCDM_04521 PE=4 SV=1
tr|V5BBC9|V5BBC9_TRYCR	2	0.971	0.73	0.678	0.00048893	DNA repair protein RAD2 OS=Trypanosoma cruzi Dm28c OX=1416333 GN=TCDM_06722 PE=4 SV=1
tr|V5BGZ1|V5BGZ1_TRYCR	2	0.096	0.56	0.33	2340000000	Uncharacterized protein OS=Trypanosoma cruzi Dm28c OX=1416333 GN=TCDM_08334 PE=4 SV=1
tr|V5C2M3|V5C2M3_TRYCR	2	0.102	0.56	0.332	24700000000	Uncharacterized protein OS=Trypanosoma cruzi Dm28c OX=1416333 GN=TCDM_00020 PE=4 SV=1
tr|V5BJE1|V5BJE1_TRYCR	1	0.793	0	0.32	402000000000	Uncharacterized protein OS=Trypanosoma cruzi Dm28c OX=1416333 GN=TCDM_03412 PE=4 SV=1
tr|V5B4D1|V5B4D1_TRYCR	2	0.808	0.67	0.604	8790000000	Uncharacterized protein OS=Trypanosoma cruzi Dm28c OX=1416333 GN=TCDM_03174 PE=4 SV=1
tr|V5BD37|V5BD37_TRYCR	2	0.123	0.53	0.329	29700000000	Elks delta-like protein OS=Trypanosoma cruzi Dm28c OX=1416333 GN=TCDM_05992 PE=4 SV=1
tr|V5BY91|V5BY91_TRYCR	2	0.409	0.73	0.491	141000000000	Uncharacterized protein OS=Trypanosoma cruzi Dm28c OX=1416333 GN=TCDM_13762 PE=4 SV=1
tr|V5BLK6|V5BLK6_TRYCR	1	0.431	0	0.199	7710000000	Uncharacterized protein OS=Trypanosoma cruzi Dm28c OX=1416333 GN=TCDM_02597 PE=4 SV=1
tr|V5ARH3|V5ARH3_TRYCR	1	0.714	0	0.294	265000000000	Coiled-coil domain-containing protein 13 OS=Trypanosoma cruzi Dm28c OX=1416333 GN=TCDM_08829 PE=4 SV=1
tr|V5BS35|V5BS35_TRYCR	2	0.295	0.6	0.409	8370000000	Uncharacterized protein OS=Trypanosoma cruzi Dm28c OX=1416333 GN=TCDM_02267 PE=4 SV=1
tr|V5BL83|V5BL83_TRYCR	2	0.221	0.72	0.425	5710000000	Leucine-rich repeat protein (LRRP) OS=Trypanosoma cruzi Dm28c OX=1416333 GN=TCDM_06415 PE=4 SV=1
tr|V5CZR9|V5CZR9_TRYCR	6	0.285	0.56	0.615	24000000000	Retrotransposon hot spot (RHS) protein OS=Trypanosoma cruzi Dm28c OX=1416333 GN=TCDM_11728 PE=4 SV=1
tr|V5BPJ2|V5BPJ2_TRYCR	4	0.782	0.63	0.693	0.000151157	Flagellar Member 4 OS=Trypanosoma cruzi Dm28c OX=1416333 GN=TCDM_04850 PE=4 SV=1
tr|V5B8C1|V5B8C1_TRYCR	2	0.193	0.59	0.372	4860000000	5-methylcytosine rRNA methyltransferase NSUN4 OS=Trypanosoma cruzi Dm28c OX=1416333 GN=TCDM_10103 PE=3 SV=1
tr|V5BQH6|V5BQH6_TRYCR	2	0.171	0.52	0.341	4220000000	non-specific serine/threonine protein kinase OS=Trypanosoma cruzi Dm28c OX=1416333 GN=TCDM_01191 PE=3 SV=1
tr|V5C306|V5C306_TRYCR	3	0.097	0.57	0.389	35600000000	Syntaxin OS=Trypanosoma cruzi Dm28c OX=1416333 GN=TCDM_00232 PE=3 SV=1
tr|V5B173|V5B173_TRYCR	1	0.193	0	0.12	24300000000	Peptide deformylase OS=Trypanosoma cruzi Dm28c OX=1416333 GN=TCDM_04458 PE=3 SV=1
tr|V5BUS4|V5BUS4_TRYCR	1	0.23	0	0.132	3010000000	CDC16 OS=Trypanosoma cruzi Dm28c OX=1416333 GN=TCDM_02873 PE=4 SV=1
tr|V5BLJ1|V5BLJ1_TRYCR	3	0.018	0.55	0.356	93600000	SUI1 domain-containing protein OS=Trypanosoma cruzi Dm28c OX=1416333 GN=TCDM_02569 PE=4 SV=1
tr|V5BDT6|V5BDT6_TRYCR	4	0.624	0.83	0.707	69800000000	ATP-dependent RNA helicase OS=Trypanosoma cruzi Dm28c OX=1416333 GN=TCDM_05633 PE=3 SV=1
tr|V5BK27|V5BK27_TRYCR	3	0.098	0.62	0.406	35600000000	Uncharacterized protein OS=Trypanosoma cruzi Dm28c OX=1416333 GN=TCDM_03071 PE=4 SV=1
tr|V5BTF7|V5BTF7_TRYCR	4	0.67	0.68	0.672	85700000000	Fumarylacetoacetase-like C-terminal domain-containing protein OS=Trypanosoma cruzi Dm28c OX=1416333 GN=TCDM_03348 PE=3 SV=1
tr|V5BF34|V5BF34_TRYCR	4	0.168	0.69	0.508	82900000	CNH domain-containing protein OS=Trypanosoma cruzi Dm28c OX=1416333 GN=TCDM_04969 PE=3 SV=1
tr|V5BAG8|V5BAG8_TRYCR	4	0.12	0.64	0.476	5830000000	PCIF1 WW domain-containing protein OS=Trypanosoma cruzi Dm28c OX=1416333 GN=TCDM_07250 PE=4 SV=1
tr|V5AZY6|V5AZY6_TRYCR	4	0.208	0.72	0.532	106000000000	RNA-binding protein OS=Trypanosoma cruzi Dm28c OX=1416333 GN=TCDM_04959 PE=4 SV=1
tr|V5B213|V5B213_TRYCR	2	0.075	0.69	0.366	18700000000	Centromere protein J C-terminal domain-containing protein OS=Trypanosoma cruzi Dm28c OX=1416333 GN=TCDM_04110 PE=3 SV=1
tr|V5BRC4|V5BRC4_TRYCR	4	0.377	0.82	0.621	24400000000	Cap-specific mRNA (nucleoside-2'-O-)-methyltransferase OS=Trypanosoma cruzi Dm28c OX=1416333 GN=TCDM_00895 PE=4 SV=1
tr|V5BI79|V5BI79_TRYCR	2	0.099	0.72	0.384	2420000000	tRNA nucleotidyltransferase OS=Trypanosoma cruzi Dm28c OX=1416333 GN=TCDM_05645 PE=3 SV=1
tr|V5BSR7|V5BSR7_TRYCR	4	0.267	0.58	0.505	146000000000	Uncharacterized protein OS=Trypanosoma cruzi Dm28c OX=1416333 GN=TCDM_00366 PE=4 SV=1
tr|V5BP68|V5BP68_TRYCR	3	0.037	0.66	0.399	1560000000	Uncharacterized protein OS=Trypanosoma cruzi Dm28c OX=1416333 GN=TCDM_04988 PE=4 SV=1
tr|V5BTL6|V5BTL6_TRYCR	4	0.527	0.59	0.595	462000000000	Uncharacterized protein OS=Trypanosoma cruzi Dm28c OX=1416333 GN=TCDM_01806 PE=4 SV=1
tr|V5AQC4|V5AQC4_TRYCR	2	0.153	0.73	0.405	37300000000	Uncharacterized protein OS=Trypanosoma cruzi Dm28c OX=1416333 GN=TCDM_09282 PE=4 SV=1
tr|V5BDS9|V5BDS9_TRYCR	2	0.054	0.5	0.296	14100000000	PDEase domain-containing protein OS=Trypanosoma cruzi Dm28c OX=1416333 GN=TCDM_07831 PE=4 SV=1
tr|V5BJH0|V5BJH0_TRYCR	4	0.091	0.61	0.456	44700000000	Inositol-1-monophosphatase OS=Trypanosoma cruzi Dm28c OX=1416333 GN=TCDM_05171 PE=3 SV=1
tr|V5BQC3|V5BQC3_TRYCR	4	0.023	0.66	0.45	1470000000	Uncharacterized protein OS=Trypanosoma cruzi Dm28c OX=1416333 GN=TCDM_04573 PE=4 SV=1
tr|V5B895|V5B895_TRYCR	3	0.026	0.62	0.382	12200000000	Leucine-rich repeat-containing protein 51 OS=Trypanosoma cruzi Dm28c OX=1416333 GN=TCDM_08186 PE=4 SV=1
tr|V5DCJ5|V5DCJ5_TRYCR	2	0.062	0.56	0.318	15800000000	SAM-dependent MTase RsmB/NOP-type domain-containing protein OS=Trypanosoma cruzi Dm28c OX=1416333 GN=TCDM_06574 PE=3 SV=1
tr|V5B8T9|V5B8T9_TRYCR	2	0.317	0.7	0.45	9300000000	PRORP domain-containing protein OS=Trypanosoma cruzi Dm28c OX=1416333 GN=TCDM_01668 PE=3 SV=1
tr|V5BM57|V5BM57_TRYCR	2	0.065	0.57	0.323	16400000000	Replication factor C OS=Trypanosoma cruzi Dm28c OX=1416333 GN=TCDM_05960 PE=4 SV=1
tr|V5DQL3|V5DQL3_TRYCR	2	0.095	0.62	0.349	23100000000	Splicing factor 3a OS=Trypanosoma cruzi Dm28c OX=1416333 GN=TCDM_01410 PE=3 SV=1
tr|V5DMN4|V5DMN4_TRYCR	2	0.178	0.62	0.377	44300000000	Myosin heavy chain OS=Trypanosoma cruzi Dm28c OX=1416333 GN=TCDM_02637 PE=4 SV=1
tr|V5AUS2|V5AUS2_TRYCR	4	0.053	0.61	0.443	27900000000	GPI transamidase component Tta1 OS=Trypanosoma cruzi Dm28c OX=1416333 GN=TCDM_07355 PE=4 SV=1
tr|V5BE82|V5BE82_TRYCR	2	0.022	0.54	0.298	726000000	Oxidoreductase OS=Trypanosoma cruzi Dm28c OX=1416333 GN=TCDM_07585 PE=3 SV=1
tr|V5BHW6|V5BHW6_TRYCR	2	0.297	0.71	0.447	848000000	Plus3 domain-containing protein OS=Trypanosoma cruzi Dm28c OX=1416333 GN=TCDM_05870 PE=4 SV=1
tr|V5B6K0|V5B6K0_TRYCR	2	0.763	0.63	0.575	67900000000	Small-subunit processome Utp12 domain-containing protein OS=Trypanosoma cruzi Dm28c OX=1416333 GN=TCDM_02384 PE=3 SV=1
tr|V5DRF7|V5DRF7_TRYCR	2	0.199	0.52	0.351	5040000000	Mannosyltransferase OS=Trypanosoma cruzi Dm28c OX=1416333 GN=TCDM_01114 PE=3 SV=1
tr|V5AMS7|V5AMS7_TRYCR	3	0.098	0.62	0.406	35800000000	Methyltransferase type 11 domain-containing protein OS=Trypanosoma cruzi Dm28c OX=1416333 GN=TCDM_10377 PE=4 SV=1
tr|V5B617|V5B617_TRYCR	2	0.673	0.73	0.579	43500000000	Non-specific serine/threonine protein kinase OS=Trypanosoma cruzi Dm28c OX=1416333 GN=TCDM_09226 PE=4 SV=1
tr|V5BRU5|V5BRU5_TRYCR	2	0.1	0.7	0.378	24300000000	ATPase OS=Trypanosoma cruzi Dm28c OX=1416333 GN=TCDM_00690 PE=3 SV=1
tr|V5DPG9|V5DPG9_TRYCR	2	0.197	0.64	0.39	4960000000	Uncharacterized protein OS=Trypanosoma cruzi Dm28c OX=1416333 GN=TCDM_01824 PE=4 SV=1
tr|V5DR48|V5DR48_TRYCR	2	0.085	0.59	0.336	2090000000	Cytosolic Fe-S cluster assembly factor NUBP2 homolog OS=Trypanosoma cruzi Dm28c OX=1416333 GN=TCDM_01354 PE=3 SV=1
tr|V5B2Q8|V5B2Q8_TRYCR	2	0.006	0.64	0.326	312000000	Band 7 domain-containing protein OS=Trypanosoma cruzi Dm28c OX=1416333 GN=TCDM_10497 PE=4 SV=1
tr|V5D1K6|V5D1K6_TRYCR	2	0.135	0.71	0.393	32800000000	Small G-protein OS=Trypanosoma cruzi Dm28c OX=1416333 GN=TCDM_11061 PE=3 SV=1
tr|V5BGI7|V5BGI7_TRYCR	4	0.067	0.57	0.435	33700000000	Importin N-terminal domain-containing protein OS=Trypanosoma cruzi Dm28c OX=1416333 GN=TCDM_06515 PE=4 SV=1
tr|V5AKS5|V5AKS5_TRYCR	2	0.05	0.67	0.351	1330000000	Proteasome 26S non-ATPase subunit 9 OS=Trypanosoma cruzi Dm28c OX=1416333 GN=TCDM_11146 PE=4 SV=1
tr|V5AJ90|V5AJ90_TRYCR	2	0.063	0.61	0.335	16100000000	Aminomethyltransferase folate-binding domain-containing protein OS=Trypanosoma cruzi Dm28c OX=1416333 GN=TCDM_11760 PE=4 SV=1
tr|V5BU08|V5BU08_TRYCR	4	0.15	0.54	0.452	7320000000	NFACT RNA-binding domain-containing protein OS=Trypanosoma cruzi Dm28c OX=1416333 GN=TCDM_01389 PE=3 SV=1
tr|V5BSG8|V5BSG8_TRYCR	2	0.049	0.67	0.351	13000000000	Mitogen-activated protein kinase 5 OS=Trypanosoma cruzi Dm28c OX=1416333 GN=TCDM_02136 PE=4 SV=1
tr|V5AIL9|V5AIL9_TRYCR	2	0.009	0.56	0.301	4050000000	Uncharacterized protein OS=Trypanosoma cruzi Dm28c OX=1416333 GN=TCDM_11994 PE=4 SV=1
tr|V5B7G6|V5B7G6_TRYCR	2	0.028	0.53	0.297	843000000	Uncharacterized protein OS=Trypanosoma cruzi Dm28c OX=1416333 GN=TCDM_08623 PE=4 SV=1
tr|V5BUD1|V5BUD1_TRYCR	2	0.035	0.6	0.323	10000000000	Guanine nucleotide-binding protein subunit beta-like protein OS=Trypanosoma cruzi Dm28c OX=1416333 GN=TCDM_01247 PE=4 SV=1
tr|V5C1R6|V5C1R6_TRYCR	2	0.036	0.59	0.32	10300000000	J domain-containing protein OS=Trypanosoma cruzi Dm28c OX=1416333 GN=TCDM_00498 PE=4 SV=1
tr|V5B639|V5B639_TRYCR	2	0.036	0.57	0.313	10300000000	Protein kinase OS=Trypanosoma cruzi Dm28c OX=1416333 GN=TCDM_09216 PE=4 SV=1
tr|V5BF96|V5BF96_TRYCR	2	0.068	0.57	0.324	17300000000	WW domain-containing protein OS=Trypanosoma cruzi Dm28c OX=1416333 GN=TCDM_04906 PE=4 SV=1
tr|V5DFK1|V5DFK1_TRYCR	2	0.01	0.57	0.304	414000000	Uncharacterized protein OS=Trypanosoma cruzi Dm28c OX=1416333 GN=TCDM_05212 PE=4 SV=1
tr|V5BT58|V5BT58_TRYCR	2	0.016	0.64	0.33	565000000	SET domain-containing protein OS=Trypanosoma cruzi Dm28c OX=1416333 GN=TCDM_01910 PE=4 SV=1
tr|V5BJG9|V5BJG9_TRYCR	2	0.053	0.69	0.359	13900000000	Uncharacterized protein OS=Trypanosoma cruzi Dm28c OX=1416333 GN=TCDM_07296 PE=4 SV=1
tr|V5BXX3|V5BXX3_TRYCR	2	0.055	0.53	0.306	14300000000	Uncharacterized protein OS=Trypanosoma cruzi Dm28c OX=1416333 GN=TCDM_00076 PE=4 SV=1
tr|V5BMH6|V5BMH6_TRYCR	2	0.154	0.66	0.382	3750000000	Dynein axonemal assembly factor 4 OS=Trypanosoma cruzi Dm28c OX=1416333 GN=TCDM_05797 PE=4 SV=1
tr|V5DKP6|V5DKP6_TRYCR	2	0.129	0.59	0.351	3130000000	Uncharacterized protein OS=Trypanosoma cruzi Dm28c OX=1416333 GN=TCDM_03304 PE=4 SV=1
tr|V5AUL7|V5AUL7_TRYCR	2	0.059	0.7	0.364	15200000000	Protein kinase domain-containing protein OS=Trypanosoma cruzi Dm28c OX=1416333 GN=TCDM_07411 PE=4 SV=1
tr|V5D569|V5D569_TRYCR	2	0.044	0.68	0.352	11900000000	Mu-adaptin 4 OS=Trypanosoma cruzi Dm28c OX=1416333 GN=TCDM_09726 PE=3 SV=1
tr|V5BX74|V5BX74_TRYCR	2	0.16	0.54	0.344	39200000000	Uncharacterized protein OS=Trypanosoma cruzi Dm28c OX=1416333 GN=TCDM_02171 PE=4 SV=1
tr|V5BBM7|V5BBM7_TRYCR	2	0.082	0.6	0.338	2020000000	SET domain-containing protein OS=Trypanosoma cruzi Dm28c OX=1416333 GN=TCDM_08725 PE=4 SV=1
tr|V5BAN7|V5BAN7_TRYCR	2	0.018	0.58	0.31	620000000	SAM-dependent MTase RsmB/NOP-type domain-containing protein OS=Trypanosoma cruzi Dm28c OX=1416333 GN=TCDM_07099 PE=3 SV=1
tr|V5B6Y6|V5B6Y6_TRYCR	2	0.055	0.55	0.313	14400000000	3'-phosphate/5'-hydroxy nucleic acid ligase OS=Trypanosoma cruzi Dm28c OX=1416333 GN=TCDM_10623 PE=3 SV=1
tr|V5BSU4|V5BSU4_TRYCR	4	0.092	0.68	0.48	44800000000	Thioredoxin domain-containing protein OS=Trypanosoma cruzi Dm28c OX=1416333 GN=TCDM_03680 PE=4 SV=1
tr|V5DHD7|V5DHD7_TRYCR	2	0.008	0.59	0.31	3670000000	CCAAT-binding factor domain-containing protein OS=Trypanosoma cruzi Dm28c OX=1416333 GN=TCDM_04510 PE=3 SV=1
tr|V5BA48|V5BA48_TRYCR	2	0.037	0.62	0.33	10500000000	Fatty acid desaturase OS=Trypanosoma cruzi Dm28c OX=1416333 GN=TCDM_09345 PE=3 SV=1
tr|V5DCD8|V5DCD8_TRYCR	2	0.108	0.59	0.344	26300000000	C3H1-type domain-containing protein OS=Trypanosoma cruzi Dm28c OX=1416333 GN=TCDM_06613 PE=4 SV=1
tr|V5BTR5|V5BTR5_TRYCR	2	0.016	0.55	0.3	582000000	Ribosomal RNA-processing protein 12-like conserved domain-containing protein OS=Trypanosoma cruzi Dm28c OX=1416333 GN=TCDM_01554 PE=4 SV=1
tr|V5BUF5|V5BUF5_TRYCR	2	0.067	0.54	0.313	16900000000	Aldo/keto reductase OS=Trypanosoma cruzi Dm28c OX=1416333 GN=TCDM_01277 PE=4 SV=1
tr|V5B8C2|V5B8C2_TRYCR	2	0.236	0.71	0.426	62200000000	ATP-dependent DNA helicase OS=Trypanosoma cruzi Dm28c OX=1416333 GN=TCDM_01796 PE=3 SV=1
tr|V5BPK3|V5BPK3_TRYCR	2	0.268	0.72	0.44	7320000000	Ubiquitin-like domain-containing protein OS=Trypanosoma cruzi Dm28c OX=1416333 GN=TCDM_03230 PE=4 SV=1
tr|V5BFW4|V5BFW4_TRYCR	2	0.147	0.58	0.353	3580000000	Uncharacterized protein OS=Trypanosoma cruzi Dm28c OX=1416333 GN=TCDM_04709 PE=4 SV=1
tr|V5DE49|V5DE49_TRYCR	2	0.025	0.6	0.319	794000	Small ribosomal subunit protein mS29 OS=Trypanosoma cruzi Dm28c OX=1416333 GN=TCDM_05876 PE=3 SV=1
tr|V5BDP5|V5BDP5_TRYCR	2	0.164	0.53	0.342	4050000000	Uncharacterized protein OS=Trypanosoma cruzi Dm28c OX=1416333 GN=TCDM_07861 PE=4 SV=1
tr|V5DLM1|V5DLM1_TRYCR	2	0.374	0.63	0.446	121000000000	Spindle pole body component OS=Trypanosoma cruzi Dm28c OX=1416333 GN=TCDM_02900 PE=3 SV=1
tr|V5B6T4|V5B6T4_TRYCR	3	0.113	0.76	0.458	4110000000	Translation-associated element 2 OS=Trypanosoma cruzi Dm28c OX=1416333 GN=TCDM_10684 PE=3 SV=1
tr|V5B9C8|V5B9C8_TRYCR	3	0.627	0.79	0.639	530000000000	Uncharacterized protein OS=Trypanosoma cruzi Dm28c OX=1416333 GN=TCDM_01302 PE=4 SV=1
tr|V5AWB7|V5AWB7_TRYCR	1	0.959	0	0.375	0.000188374	Flap endonuclease 1 OS=Trypanosoma cruzi Dm28c OX=1416333 GN=TCDM_06623 PE=3 SV=1
tr|V5BAM3|V5BAM3_TRYCR	3	0.094	0.72	0.438	34400000000	Uncharacterized protein OS=Trypanosoma cruzi Dm28c OX=1416333 GN=TCDM_07078 PE=3 SV=1
tr|V5BKX8|V5BKX8_TRYCR	3	0.089	0.58	0.39	32700000000	Uncharacterized protein OS=Trypanosoma cruzi Dm28c OX=1416333 GN=TCDM_06570 PE=4 SV=1
tr|V5DFP8|V5DFP8_TRYCR	1	0.837	0	0.335	530000000000	Uncharacterized protein OS=Trypanosoma cruzi Dm28c OX=1416333 GN=TCDM_05146 PE=4 SV=1
tr|V5B9P8|V5B9P8_TRYCR	1	0.522	0	0.23	113000000000	glyceraldehyde-3-phosphate dehydrogenase (phosphorylating) OS=Trypanosoma cruzi Dm28c OX=1416333 GN=TCDM_07515 PE=3 SV=1
tr|V5B3J6|V5B3J6_TRYCR	2	0.247	0.62	0.4	6570000000	Hook complex protein, conserved OS=Trypanosoma cruzi Dm28c OX=1416333 GN=TCDM_03461 PE=4 SV=1
tr|V5BSF6|V5BSF6_TRYCR	2	0.851	0.51	0.565	0.000117115	Cilia-and flagella-associated protein 96 OS=Trypanosoma cruzi Dm28c OX=1416333 GN=TCDM_03750 PE=3 SV=1
tr|V5AZ17|V5AZ17_TRYCR	2	0.168	0.68	0.394	4150000000	Uncharacterized protein OS=Trypanosoma cruzi Dm28c OX=1416333 GN=TCDM_05328 PE=4 SV=1
tr|V5BFU8|V5BFU8_TRYCR	2	0.148	0.55	0.344	36000000000	Large ribosomal subunit protein uL15/eL18 domain-containing protein OS=Trypanosoma cruzi Dm28c OX=1416333 GN=TCDM_08876 PE=3 SV=1
tr|V5B5Q7|V5B5Q7_TRYCR	2	0.053	0.61	0.332	13900000000	MYND-type domain-containing protein OS=Trypanosoma cruzi Dm28c OX=1416333 GN=TCDM_02698 PE=4 SV=1
tr|V5DM89|V5DM89_TRYCR	2	0.122	0.58	0.345	29600000000	Flagellar Member 7 OS=Trypanosoma cruzi Dm28c OX=1416333 GN=TCDM_02660 PE=4 SV=1
tr|V5BEN2|V5BEN2_TRYCR	2	0.201	0.69	0.408	5080000000	PQ-loop repeat-containing protein 1 OS=Trypanosoma cruzi Dm28c OX=1416333 GN=TCDM_07414 PE=4 SV=1
tr|V5BKG1|V5BKG1_TRYCR	2	0.025	0.55	0.303	783000000	TPR-repeat protein OS=Trypanosoma cruzi Dm28c OX=1416333 GN=TCDM_04700 PE=4 SV=1
tr|V5D807|V5D807_TRYCR	2	0.941	0.73	0.668	0.000278879	Aminotransferase class V domain-containing protein OS=Trypanosoma cruzi Dm28c OX=1416333 GN=TCDM_08607 PE=4 SV=1
tr|V5BCJ6|V5BCJ6_TRYCR	2	0.043	0.7	0.359	11800000000	Roadblock/LAMTOR2 domain-containing protein OS=Trypanosoma cruzi Dm28c OX=1416333 GN=TCDM_00012 PE=4 SV=1
tr|V5BCH4|V5BCH4_TRYCR	2	0.068	0.6	0.334	17200000000	Ras-related protein Rab-21 OS=Trypanosoma cruzi Dm28c OX=1416333 GN=TCDM_14323 PE=4 SV=1
tr|V5BQZ1|V5BQZ1_TRYCR	2	0.082	0.68	0.365	2020000000	WW domain-containing protein OS=Trypanosoma cruzi Dm28c OX=1416333 GN=TCDM_04339 PE=4 SV=1
tr|V5BAD2|V5BAD2_TRYCR	2	0.059	0.61	0.334	15300000000	C3H1-type domain-containing protein OS=Trypanosoma cruzi Dm28c OX=1416333 GN=TCDM_07279 PE=3 SV=1
tr|V5BQ11|V5BQ11_TRYCR	2	0.037	0.67	0.347	10400000000	NADH-ubiquinone oxidoreductase complex I subunit OS=Trypanosoma cruzi Dm28c OX=1416333 GN=TCDM_03027 PE=4 SV=1
tr|V5BRS4|V5BRS4_TRYCR	2	0.142	0.63	0.368	34400000000	Actin-related protein 2/3 complex subunit OS=Trypanosoma cruzi Dm28c OX=1416333 GN=TCDM_02401 PE=3 SV=1
tr|V5B627|V5B627_TRYCR	2	0.111	0.59	0.345	26900000000	Uncharacterized protein OS=Trypanosoma cruzi Dm28c OX=1416333 GN=TCDM_14421 PE=4 SV=1
tr|V5DGN4|V5DGN4_TRYCR	2	0.075	0.62	0.343	1880000000	Uncharacterized protein OS=Trypanosoma cruzi Dm28c OX=1416333 GN=TCDM_04795 PE=4 SV=1
tr|V5BJR9|V5BJR9_TRYCR	2	0.049	0.54	0.307	13100000000	Bardet-Biedl syndrome 5 protein OS=Trypanosoma cruzi Dm28c OX=1416333 GN=TCDM_05013 PE=3 SV=1
tr|V5BVE3|V5BVE3_TRYCR	2	0.031	0.64	0.335	910000000	Trans-sialidase OS=Trypanosoma cruzi Dm28c OX=1416333 GN=TCDM_00949 PE=4 SV=1
tr|V5DIL5|V5DIL5_TRYCR	2	0.198	0.6	0.377	5000000000	Uncharacterized protein OS=Trypanosoma cruzi Dm28c OX=1416333 GN=TCDM_04036 PE=3 SV=1
tr|V5B6Z0|V5B6Z0_TRYCR	2	0.091	0.51	0.311	22200000000	Uncharacterized protein OS=Trypanosoma cruzi Dm28c OX=1416333 GN=TCDM_02292 PE=4 SV=1
tr|V5DRU1|V5DRU1_TRYCR	2	0.505	0.72	0.519	210000000000	TFIIS central domain-containing protein OS=Trypanosoma cruzi Dm28c OX=1416333 GN=TCDM_14190 PE=4 SV=1
tr|V5BFC1|V5BFC1_TRYCR	2	0.018	0.63	0.327	613000000	Protein phosphatase 2A regulatory subunit OS=Trypanosoma cruzi Dm28c OX=1416333 GN=TCDM_04952 PE=4 SV=1
tr|V5B9H5|V5B9H5_TRYCR	2	0.218	0.66	0.404	56200000000	C2 NT-type domain-containing protein OS=Trypanosoma cruzi Dm28c OX=1416333 GN=TCDM_07681 PE=4 SV=1
tr|V5B6H7|V5B6H7_TRYCR	2	0.089	0.65	0.357	21700000000	FYVE, RhoGEF and PH domain-containing protein 2 OS=Trypanosoma cruzi Dm28c OX=1416333 GN=TCDM_02356 PE=4 SV=1
tr|V5BPP1|V5BPP1_TRYCR	2	0.112	0.62	0.355	2710000000	Uncharacterized protein OS=Trypanosoma cruzi Dm28c OX=1416333 GN=TCDM_03069 PE=4 SV=1
tr|V5B4K7|V5B4K7_TRYCR	2	0.107	0.51	0.317	26000000000	Inositol-1-monophosphatase OS=Trypanosoma cruzi Dm28c OX=1416333 GN=TCDM_03084 PE=3 SV=1
tr|V5BP32|V5BP32_TRYCR	2	0.122	0.65	0.368	2950000000	Uncharacterized protein OS=Trypanosoma cruzi Dm28c OX=1416333 GN=TCDM_14457 PE=4 SV=1
tr|V5BIV2|V5BIV2_TRYCR	2	0.24	0.59	0.388	6360000000	EF-hand domain-containing protein OS=Trypanosoma cruzi Dm28c OX=1416333 GN=TCDM_07492 PE=4 SV=1
tr|V5BM39|V5BM39_TRYCR	2	0.338	0.56	0.41	102000000000	Ras-family member OS=Trypanosoma cruzi Dm28c OX=1416333 GN=TCDM_13992 PE=3 SV=1
tr|V5BV66|V5BV66_TRYCR	2	0.152	0.63	0.372	3700000000	Uncharacterized protein OS=Trypanosoma cruzi Dm28c OX=1416333 GN=TCDM_01210 PE=4 SV=1
tr|V5BEJ5|V5BEJ5_TRYCR	2	0.728	0.68	0.58	566000000000	ATP-grasp domain-containing protein OS=Trypanosoma cruzi Dm28c OX=1416333 GN=TCDM_07457 PE=4 SV=1
tr|V5BY30|V5BY30_TRYCR	2	0.304	0.54	0.392	875000000	PIH1D1/2/3 CS-like domain-containing protein OS=Trypanosoma cruzi Dm28c OX=1416333 GN=TCDM_01704 PE=4 SV=1
tr|V5BUZ5|V5BUZ5_TRYCR	2	0.255	0.6	0.396	6850000000	p450 reductase OS=Trypanosoma cruzi Dm28c OX=1416333 GN=TCDM_02758 PE=4 SV=1
tr|V5BJG4|V5BJG4_TRYCR	2	0.113	0.58	0.342	27300000000	Uncharacterized protein OS=Trypanosoma cruzi Dm28c OX=1416333 GN=TCDM_07290 PE=4 SV=1
tr|V5BPS9|V5BPS9_TRYCR	2	0.033	0.56	0.309	961000000	Phosphatidylinositol-4-phosphate 5-kinase OS=Trypanosoma cruzi Dm28c OX=1416333 GN=TCDM_04772 PE=4 SV=1
tr|V5BUH7|V5BUH7_TRYCR	2	0.708	0.55	0.53	514000000000	Uncharacterized protein OS=Trypanosoma cruzi Dm28c OX=1416333 GN=TCDM_02951 PE=4 SV=1
tr|V5ARA5|V5ARA5_TRYCR	2	0.023	0.57	0.309	746000000	Pre-mRNA-splicing factor SYF1 OS=Trypanosoma cruzi Dm28c OX=1416333 GN=TCDM_08920 PE=3 SV=1
tr|V5BTD6|V5BTD6_TRYCR	2	0.371	0.66	0.455	119000000000	Pep3/Vps18/deep orange beta-propeller domain-containing protein OS=Trypanosoma cruzi Dm28c OX=1416333 GN=TCDM_01726 PE=4 SV=1
tr|V5DF64|V5DF64_TRYCR	2	0.406	0.53	0.423	138000000000	Uncharacterized protein OS=Trypanosoma cruzi Dm28c OX=1416333 GN=TCDM_05381 PE=4 SV=1
tr|V5BE24|V5BE24_TRYCR	2	0.065	0.57	0.323	16400000000	FtsJ cell division protein OS=Trypanosoma cruzi Dm28c OX=1416333 GN=TCDM_05479 PE=4 SV=1
tr|V5BSQ3|V5BSQ3_TRYCR	2	0.276	0.52	0.376	7640000000	6-phosphofructo-2-kinase/fructose-2 OS=Trypanosoma cruzi Dm28c OX=1416333 GN=TCDM_00348 PE=4 SV=1
tr|V5BLH1|V5BLH1_TRYCR	2	0.657	0.53	0.507	40400000000	Kinesin-like protein OS=Trypanosoma cruzi Dm28c OX=1416333 GN=TCDM_06295 PE=3 SV=1
tr|V5BJJ9|V5BJJ9_TRYCR	2	0.23	0.72	0.428	6020000000	Uncharacterized protein OS=Trypanosoma cruzi Dm28c OX=1416333 GN=TCDM_07248 PE=4 SV=1
tr|V5BGX7|V5BGX7_TRYCR	2	0.067	0.65	0.35	16900000000	Uncharacterized protein OS=Trypanosoma cruzi Dm28c OX=1416333 GN=TCDM_06261 PE=4 SV=1
tr|V5D579|V5D579_TRYCR	2	0.275	0.51	0.373	76100000000	non-specific serine/threonine protein kinase OS=Trypanosoma cruzi Dm28c OX=1416333 GN=TCDM_09739 PE=3 SV=1
tr|V5AYJ7|V5AYJ7_TRYCR	1	0.405	0	0.191	68900000000	Uncharacterized protein OS=Trypanosoma cruzi Dm28c OX=1416333 GN=TCDM_05547 PE=4 SV=1
tr|V5D4R1|V5D4R1_TRYCR	1	0.362	0	0.176	5710000000	Choline/carnitine O-acyltransferase OS=Trypanosoma cruzi Dm28c OX=1416333 GN=TCDM_09869 PE=3 SV=1
tr|V5BAR0|V5BAR0_TRYCR	1	0.399	0	0.189	6710000000	Lebercilin domain-containing protein OS=Trypanosoma cruzi Dm28c OX=1416333 GN=TCDM_10925 PE=4 SV=1
tr|V5BR61|V5BR61_TRYCR	1	0.2	0	0.122	2530000000	Large ribosomal subunit protein uL22c OS=Trypanosoma cruzi Dm28c OX=1416333 GN=TCDM_02572 PE=3 SV=1
tr|V5BUI1|V5BUI1_TRYCR	1	0.207	0	0.125	2640000000	Uncharacterized protein OS=Trypanosoma cruzi Dm28c OX=1416333 GN=TCDM_02956 PE=4 SV=1
tr|V5BED1|V5BED1_TRYCR	1	0.238	0	0.135	31400000000	Peroxisome assembly protein OS=Trypanosoma cruzi Dm28c OX=1416333 GN=TCDM_05315 PE=3 SV=1
tr|V5BVK2|V5BVK2_TRYCR	1	0.677	0	0.281	221000000000	Metal-binding domain-containing protein OS=Trypanosoma cruzi Dm28c OX=1416333 GN=TCDM_01061 PE=4 SV=1
tr|V5BYX2|V5BYX2_TRYCR	1	0.538	0	0.235	121000000000	Uncharacterized protein OS=Trypanosoma cruzi Dm28c OX=1416333 GN=TCDM_01436 PE=4 SV=1

## Sheet: onlyRe-compound
Exclusively detected in samples treated with fac-[Re(CO)3(tmp)(CTZ)](PF6)
Uniprot ID	Replicate Count	Quant CDF	Variation Score	RHV Score	Total Signal	Description
tr|V5BNZ8|V5BNZ8_TRYCR	6	0.297	0.67	0.656	254000000000	Cation-transporting ATPase OS=Trypanosoma cruzi Dm28c OX=1416333 GN=TCDM_01802 PE=3 SV=1
tr|V5B2Y1|V5B2Y1_TRYCR	5	0.509	0.84	0.727	53400000000	TerD domain-containing protein OS=Trypanosoma cruzi Dm28c OX=1416333 GN=TCDM_10420 PE=4 SV=1
tr|V5BCK5|V5BCK5_TRYCR	4	0.155	0.65	0.491	7590000000	Acid phosphatase OS=Trypanosoma cruzi Dm28c OX=1416333 GN=TCDM_08279 PE=3 SV=1
tr|V5BFV8|V5BFV8_TRYCR	4	0.121	0.63	0.473	5870000000	Nodulin-like domain-containing protein OS=Trypanosoma cruzi Dm28c OX=1416333 GN=TCDM_08887 PE=4 SV=1
tr|V5BRR9|V5BRR9_TRYCR	6	0.185	0.68	0.622	139000000000	Uncharacterized protein OS=Trypanosoma cruzi Dm28c OX=1416333 GN=TCDM_02395 PE=4 SV=1
tr|V5B7R1|V5B7R1_TRYCR	6	0.775	0.67	0.815	0.000217316	Uncharacterized protein OS=Trypanosoma cruzi Dm28c OX=1416333 GN=TCDM_14161 PE=4 SV=1
tr|V5AVV1|V5AVV1_TRYCR	4	0.086	0.6	0.451	4230000000	Serine peptidase OS=Trypanosoma cruzi Dm28c OX=1416333 GN=TCDM_06771 PE=4 SV=1
tr|V5BNI9|V5BNI9_TRYCR	2	0.234	0.72	0.429	6130000000	2,4-dienoyl-coa reductase-like protein OS=Trypanosoma cruzi Dm28c OX=1416333 GN=TCDM_01899 PE=4 SV=1
tr|V5AJ13|V5AJ13_TRYCR	6	0.208	0.6	0.603	159000000000	FG-GAP repeat protein OS=Trypanosoma cruzi Dm28c OX=1416333 GN=TCDM_13293 PE=4 SV=1
tr|V5CYM4|V5CYM4_TRYCR	6	0.071	0.66	0.577	5350000000	Sialidase domain-containing protein OS=Trypanosoma cruzi Dm28c OX=1416333 GN=TCDM_12147 PE=4 SV=1
tr|V5BGN8|V5BGN8_TRYCR	6	0.093	0.6	0.564	6800000000	Uncharacterized protein OS=Trypanosoma cruzi Dm28c OX=1416333 GN=TCDM_06483 PE=4 SV=1
tr|V5B6M4|V5B6M4_TRYCR	4	0.155	0.69	0.504	7570000000	PhoD-like phosphatase metallophosphatase domain-containing protein OS=Trypanosoma cruzi Dm28c OX=1416333 GN=TCDM_02418 PE=4 SV=1
tr|V5BYU0|V5BYU0_TRYCR	3	0.148	0.53	0.393	542000000	Intraflagellar transport (IFT) protein OS=Trypanosoma cruzi Dm28c OX=1416333 GN=TCDM_01395 PE=4 SV=1
tr|V5BPS6|V5BPS6_TRYCR	3	0.106	0.6	0.402	3870000000	Actin-like protein OS=Trypanosoma cruzi Dm28c OX=1416333 GN=TCDM_03133 PE=3 SV=1
tr|V5BBL7|V5BBL7_TRYCR	3	0.212	0.7	0.471	8160000000	Calpain-like cysteine peptidase OS=Trypanosoma cruzi Dm28c OX=1416333 GN=TCDM_06694 PE=4 SV=1
tr|V5BU60|V5BU60_TRYCR	4	0.079	0.61	0.452	39000000000	Uncharacterized protein OS=Trypanosoma cruzi Dm28c OX=1416333 GN=TCDM_03231 PE=4 SV=1
tr|V5DFC4|V5DFC4_TRYCR	4	0.149	0.54	0.452	72800000000	Sphingosine kinase A OS=Trypanosoma cruzi Dm28c OX=1416333 GN=TCDM_05353 PE=4 SV=1
tr|V5BEA4|V5BEA4_TRYCR	2	0.029	0.61	0.324	877000000	DUF4201 domain-containing protein OS=Trypanosoma cruzi Dm28c OX=1416333 GN=TCDM_05405 PE=4 SV=1
tr|V5BI45|V5BI45_TRYCR	1	0.402	0	0.19	6800000000	Cullin family profile domain-containing protein OS=Trypanosoma cruzi Dm28c OX=1416333 GN=TCDM_03847 PE=3 SV=1
tr|V5BIN4|V5BIN4_TRYCR	3	0.429	0.66	0.53	229000000000	EF-hand domain-containing protein OS=Trypanosoma cruzi Dm28c OX=1416333 GN=TCDM_03664 PE=4 SV=1
tr|V5BXL9|V5BXL9_TRYCR	6	0.138	0.65	0.596	101000000000	Dynein light chain OS=Trypanosoma cruzi Dm28c OX=1416333 GN=TCDM_14003 PE=3 SV=1
tr|V5BCD6|V5BCD6_TRYCR	2	0.18	0.54	0.351	4480000000	Ribosomal protein L39 OS=Trypanosoma cruzi Dm28c OX=1416333 GN=TCDM_13999 PE=3 SV=1
tr|V5BB00|V5BB00_TRYCR	2	0.057	0.5	0.297	14800000000	Succinate dehydrogenase subunit OS=Trypanosoma cruzi Dm28c OX=1416333 GN=TCDM_14529 PE=4 SV=1
tr|V5DH41|V5DH41_TRYCR	2	0.038	0.69	0.354	10600000000	EF-hand domain-containing protein OS=Trypanosoma cruzi Dm28c OX=1416333 GN=TCDM_04546 PE=4 SV=1
tr|V5DM18|V5DM18_TRYCR	3	0.182	0.54	0.407	6800000000	Acyl-CoA binding protein OS=Trypanosoma cruzi Dm28c OX=1416333 GN=TCDM_14198 PE=4 SV=1
tr|V5BQ15|V5BQ15_TRYCR	3	0.226	0.56	0.429	8840000000	DoxX OS=Trypanosoma cruzi Dm28c OX=1416333 GN=TCDM_14276 PE=4 SV=1
tr|V5DBK5|V5DBK5_TRYCR	2	0.366	0.54	0.413	116000000000	AP complex subunit sigma OS=Trypanosoma cruzi Dm28c OX=1416333 GN=TCDM_06947 PE=3 SV=1
tr|V5DL03|V5DL03_TRYCR	2	0.04	0.6	0.324	11200000000	Adenylate kinase OS=Trypanosoma cruzi Dm28c OX=1416333 GN=TCDM_03235 PE=3 SV=1
tr|V5BGB8|V5BGB8_TRYCR	2	0.446	0.53	0.436	164000000000	Uncharacterized protein OS=Trypanosoma cruzi Dm28c OX=1416333 GN=TCDM_14463 PE=4 SV=1
tr|V5B8N5|V5B8N5_TRYCR	2	0.338	0.52	0.397	103000000000	GTPase OS=Trypanosoma cruzi Dm28c OX=1416333 GN=TCDM_01570 PE=4 SV=1
tr|V5D9X2|V5D9X2_TRYCR	3	0.033	0.64	0.391	14400000000	U4/U6 small nuclear ribonuclear protein OS=Trypanosoma cruzi Dm28c OX=1416333 GN=TCDM_07757 PE=4 SV=1
tr|V5BCI9|V5BCI9_TRYCR	2	0.057	0.65	0.347	1480000000	Ribosomal protein L9 domain-containing protein OS=Trypanosoma cruzi Dm28c OX=1416333 GN=TCDM_06127 PE=4 SV=1
tr|V5BNA7|V5BNA7_TRYCR	4	0.061	0.6	0.443	3140000000	Uncharacterized protein OS=Trypanosoma cruzi Dm28c OX=1416333 GN=TCDM_03698 PE=4 SV=1
tr|V5AR59|V5AR59_TRYCR	5	0.036	0.64	0.503	25600000000	Dynein heavy chain OS=Trypanosoma cruzi Dm28c OX=1416333 GN=TCDM_08965 PE=4 SV=1
tr|V5BN28|V5BN28_TRYCR	2	0.02	0.55	0.301	661000000	Heat shock protein DNAJ OS=Trypanosoma cruzi Dm28c OX=1416333 GN=TCDM_01954 PE=4 SV=1
tr|V5BAU1|V5BAU1_TRYCR	2	0.022	0.67	0.342	720000000	Trans-sialidase OS=Trypanosoma cruzi Dm28c OX=1416333 GN=TCDM_09106 PE=4 SV=1
tr|V5BGW1|V5BGW1_TRYCR	2	0.064	0.7	0.366	16400000000	Uncharacterized protein OS=Trypanosoma cruzi Dm28c OX=1416333 GN=TCDM_06361 PE=4 SV=1
tr|V5DAB9|V5DAB9_TRYCR	2	0.094	0.52	0.316	2280000000	Guanine nucleotide-binding protein subunit beta-like protein OS=Trypanosoma cruzi Dm28c OX=1416333 GN=TCDM_07556 PE=4 SV=1
tr|V5BBU2|V5BBU2_TRYCR	2	0.111	0.52	0.321	26900000000	Guanylate kinase OS=Trypanosoma cruzi Dm28c OX=1416333 GN=TCDM_06585 PE=3 SV=1
tr|V5BM21|V5BM21_TRYCR	4	0.033	0.64	0.447	19200000000	Uncharacterized protein OS=Trypanosoma cruzi Dm28c OX=1416333 GN=TCDM_02362 PE=3 SV=1
tr|V5DLJ6|V5DLJ6_TRYCR	4	0.788	0.57	0.675	0.000156283	Transmembrane protein OS=Trypanosoma cruzi Dm28c OX=1416333 GN=TCDM_02869 PE=4 SV=1
tr|V5B9C2|V5B9C2_TRYCR	2	0.024	0.56	0.306	758000000	Chaperone DNAJ protein OS=Trypanosoma cruzi Dm28c OX=1416333 GN=TCDM_01293 PE=4 SV=1
tr|V5AS13|V5AS13_TRYCR	2	0.047	0.62	0.333	12700000000	Putative pantothenate kinase subunit OS=Trypanosoma cruzi Dm28c OX=1416333 GN=TCDM_08599 PE=3 SV=1
tr|V5BFS5|V5BFS5_TRYCR	2	0.404	0.55	0.429	137000000000	Uncharacterized protein OS=Trypanosoma cruzi Dm28c OX=1416333 GN=TCDM_08918 PE=4 SV=1
tr|V5BRG9|V5BRG9_TRYCR	1	0.436	0	0.201	7870000000	J domain-containing protein OS=Trypanosoma cruzi Dm28c OX=1416333 GN=TCDM_02481 PE=4 SV=1
tr|V5BNI4|V5BNI4_TRYCR	4	0.822	0.6	0.696	0.000191923	Glycogenin glucosyltransferase OS=Trypanosoma cruzi Dm28c OX=1416333 GN=TCDM_03623 PE=4 SV=1
tr|V5BQR7|V5BQR7_TRYCR	2	0.436	0.52	0.43	158000000000	Protein kinase OS=Trypanosoma cruzi Dm28c OX=1416333 GN=TCDM_00953 PE=4 SV=1
tr|V5BD07|V5BD07_TRYCR	3	0.311	0.71	0.507	13600000000	Dynein regulatory complex protein 1/2 N-terminal domain-containing protein OS=Trypanosoma cruzi Dm28c OX=1416333 GN=TCDM_05949 PE=3 SV=1
tr|V5C2Q7|V5C2Q7_TRYCR	5	0.127	0.55	0.503	7670000000	EF-hand domain-containing protein OS=Trypanosoma cruzi Dm28c OX=1416333 GN=TCDM_00077 PE=3 SV=1
tr|V5BQI9|V5BQI9_TRYCR	3	0.022	0.57	0.364	1070000000	GPI inositol deacylase OS=Trypanosoma cruzi Dm28c OX=1416333 GN=TCDM_01207 PE=4 SV=1
tr|V5BKQ8|V5BKQ8_TRYCR	3	0.052	0.6	0.384	2070000000	AP-3 complex subunit mu OS=Trypanosoma cruzi Dm28c OX=1416333 GN=TCDM_02749 PE=3 SV=1
tr|V5D935|V5D935_TRYCR	2	0.348	0.69	0.457	108000000000	Dispersed protein family protein 1 (DGF-1) OS=Trypanosoma cruzi Dm28c OX=1416333 GN=TCDM_08076 PE=4 SV=1
tr|V5B4Y4|V5B4Y4_TRYCR	1	0.405	0	0.191	69000000000	Retrotransposon hot spot protein (RHS) OS=Trypanosoma cruzi Dm28c OX=1416333 GN=TCDM_09677 PE=4 SV=1
tr|V5AU19|V5AU19_TRYCR	2	0.02	0.59	0.314	679000000	dTMP kinase OS=Trypanosoma cruzi Dm28c OX=1416333 GN=TCDM_07688 PE=3 SV=1
tr|V5AWH0|V5AWH0_TRYCR	4	0.185	0.67	0.507	9220000000	Fungal lipase-like domain-containing protein OS=Trypanosoma cruzi Dm28c OX=1416333 GN=TCDM_06491 PE=4 SV=1
tr|V5D9V3|V5D9V3_TRYCR	4	0.12	0.72	0.502	5810000000	Tob55 OS=Trypanosoma cruzi Dm28c OX=1416333 GN=TCDM_07796 PE=3 SV=1
tr|V5AKG4|V5AKG4_TRYCR	2	0.055	0.55	0.313	14300000000	Uncharacterized protein OS=Trypanosoma cruzi Dm28c OX=1416333 GN=TCDM_11268 PE=4 SV=1
tr|V5BV13|V5BV13_TRYCR	2	0.136	0.57	0.346	3290000000	Transmembrane protein OS=Trypanosoma cruzi Dm28c OX=1416333 GN=TCDM_01133 PE=4 SV=1
tr|V5BWS6|V5BWS6_TRYCR	4	0.057	0.62	0.448	29300000000	Actin-like protein OS=Trypanosoma cruzi Dm28c OX=1416333 GN=TCDM_02268 PE=3 SV=1
tr|V5DAY1|V5DAY1_TRYCR	2	0.076	0.68	0.363	18900000000	Manganese/iron superoxide dismutase C-terminal domain-containing protein OS=Trypanosoma cruzi Dm28c OX=1416333 GN=TCDM_07340 PE=4 SV=1
tr|V5DF92|V5DF92_TRYCR	4	0.616	0.84	0.708	67400000000	Uncharacterized protein OS=Trypanosoma cruzi Dm28c OX=1416333 GN=TCDM_05441 PE=4 SV=1
tr|V5BMM9|V5BMM9_TRYCR	2	0.055	0.5	0.296	14400000000	DNA-directed RNA polymerase OS=Trypanosoma cruzi Dm28c OX=1416333 GN=TCDM_03868 PE=4 SV=1
tr|V5API2|V5API2_TRYCR	2	0.045	0.64	0.339	12200000000	AB hydrolase-1 domain-containing protein OS=Trypanosoma cruzi Dm28c OX=1416333 GN=TCDM_09652 PE=4 SV=1
tr|V5DIU8|V5DIU8_TRYCR	2	0.281	0.65	0.421	7820000000	D-alanyl-glycyl endopeptidase-like protein OS=Trypanosoma cruzi Dm28c OX=1416333 GN=TCDM_03960 PE=4 SV=1
tr|V5D8I9|V5D8I9_TRYCR	4	0.02	0.59	0.426	13300000000	Vacuolar protein sorting-associated protein OS=Trypanosoma cruzi Dm28c OX=1416333 GN=TCDM_08322 PE=3 SV=1
tr|V5DQC4|V5DQC4_TRYCR	3	0.045	0.56	0.368	1830000000	Retrotransposon hot spot (RHS) protein OS=Trypanosoma cruzi Dm28c OX=1416333 GN=TCDM_01592 PE=4 SV=1
tr|V5BC66|V5BC66_TRYCR	2	0.074	0.56	0.322	18500000000	Ribonuclease inhibitor-like protein OS=Trypanosoma cruzi Dm28c OX=1416333 GN=TCDM_00314 PE=4 SV=1
tr|V5BD23|V5BD23_TRYCR	2	0.186	0.61	0.376	4640000000	Uncharacterized protein OS=Trypanosoma cruzi Dm28c OX=1416333 GN=TCDM_08077 PE=3 SV=1
tr|V5D309|V5D309_TRYCR	2	0.367	0.7	0.467	117000000000	Uncharacterized protein OS=Trypanosoma cruzi Dm28c OX=1416333 GN=TCDM_10493 PE=4 SV=1
tr|V5BNX7|V5BNX7_TRYCR	2	0.82	0.68	0.611	95000000000	RRM domain-containing protein OS=Trypanosoma cruzi Dm28c OX=1416333 GN=TCDM_01793 PE=4 SV=1
tr|V5BTL8|V5BTL8_TRYCR	3	0.184	0.63	0.438	691000000	Dynein light chain OS=Trypanosoma cruzi Dm28c OX=1416333 GN=TCDM_14454 PE=3 SV=1
tr|V5AVP6|V5AVP6_TRYCR	4	0.105	0.58	0.451	5100000000	Actin-like protein OS=Trypanosoma cruzi Dm28c OX=1416333 GN=TCDM_06907 PE=3 SV=1
tr|V5BKZ1|V5BKZ1_TRYCR	2	0.02	0.55	0.301	676000000	Thioredoxin domain-containing protein OS=Trypanosoma cruzi Dm28c OX=1416333 GN=TCDM_14035 PE=4 SV=1
tr|V5B7Z9|V5B7Z9_TRYCR	3	0.182	0.71	0.464	6790000000	Uncharacterized protein OS=Trypanosoma cruzi Dm28c OX=1416333 GN=TCDM_08349 PE=4 SV=1
tr|V5AWD4|V5AWD4_TRYCR	2	0.155	0.57	0.353	37800000000	Uncharacterized protein OS=Trypanosoma cruzi Dm28c OX=1416333 GN=TCDM_14414 PE=4 SV=1
tr|V5BLE5|V5BLE5_TRYCR	2	0.463	0.71	0.502	17600000000	NADH dehydrogenase subunit NI8M OS=Trypanosoma cruzi Dm28c OX=1416333 GN=TCDM_14374 PE=4 SV=1
tr|V5BPV7|V5BPV7_TRYCR	4	0.073	0.64	0.46	3660000000	Large ribosomal subunit protein uL3m OS=Trypanosoma cruzi Dm28c OX=1416333 GN=TCDM_02950 PE=3 SV=1
tr|V5DET2|V5DET2_TRYCR	2	0.288	0.56	0.394	8120000000	Amino acid permease OS=Trypanosoma cruzi Dm28c OX=1416333 GN=TCDM_05548 PE=4 SV=1
tr|V5BIF3|V5BIF3_TRYCR	2	0.978	0.73	0.68	0.000586666	C-CAP/cofactor C-like domain-containing protein OS=Trypanosoma cruzi Dm28c OX=1416333 GN=TCDM_07709 PE=3 SV=1
tr|V5ASZ8|V5ASZ8_TRYCR	2	0.075	0.51	0.306	18700000000	Uncharacterized protein OS=Trypanosoma cruzi Dm28c OX=1416333 GN=TCDM_08091 PE=4 SV=1
tr|V5DI47|V5DI47_TRYCR	2	0.019	0.6	0.317	657000000	Manganese-dependent ADP-ribose/CDP-alcohol diphosphatase OS=Trypanosoma cruzi Dm28c OX=1416333 GN=TCDM_04293 PE=3 SV=1
tr|V5D8R0|V5D8R0_TRYCR	4	0.326	0.6	0.531	194000000000	Uncharacterized protein OS=Trypanosoma cruzi Dm28c OX=1416333 GN=TCDM_08190 PE=4 SV=1
tr|V5BI65|V5BI65_TRYCR	2	0.188	0.53	0.35	471000000	Uncharacterized protein OS=Trypanosoma cruzi Dm28c OX=1416333 GN=TCDM_14481 PE=4 SV=1
tr|V5BBB5|V5BBB5_TRYCR	2	0.943	0.72	0.665	0.000288569	PDZ domain-containing protein OS=Trypanosoma cruzi Dm28c OX=1416333 GN=TCDM_00665 PE=4 SV=1
tr|V5BDH6|V5BDH6_TRYCR	2	0.122	0.68	0.378	295000000	U3 small nucleolar RNA-associated protein 6 OS=Trypanosoma cruzi Dm28c OX=1416333 GN=TCDM_07957 PE=4 SV=1
tr|V5BDM9|V5BDM9_TRYCR	2	0.208	0.71	0.417	530000000	Uncharacterized protein OS=Trypanosoma cruzi Dm28c OX=1416333 GN=TCDM_05677 PE=4 SV=1
tr|V5AZC6|V5AZC6_TRYCR	2	0.215	0.67	0.406	5510000000	5'-3' exonuclease XRNB OS=Trypanosoma cruzi Dm28c OX=1416333 GN=TCDM_05133 PE=4 SV=1
tr|V5CJT8|V5CJT8_TRYCR	3	0.094	0.59	0.395	3460000000	Trans-sialidase OS=Trypanosoma cruzi Dm28c OX=1416333 GN=TCDM_12891 PE=4 SV=1
tr|V5DI02|V5DI02_TRYCR	1	0.41	0	0.192	70500000000	Tim10-like domain-containing protein OS=Trypanosoma cruzi Dm28c OX=1416333 GN=TCDM_14394 PE=4 SV=1
tr|V5D4P1|V5D4P1_TRYCR	3	0.129	0.63	0.42	46700000000	Calmodulin OS=Trypanosoma cruzi Dm28c OX=1416333 GN=TCDM_09881 PE=4 SV=1
tr|V5B992|V5B992_TRYCR	1	0.419	0	0.195	7320000000	DRBM domain-containing protein OS=Trypanosoma cruzi Dm28c OX=1416333 GN=TCDM_07782 PE=4 SV=1
tr|V5DEZ0|V5DEZ0_TRYCR	1	0.197	0	0.121	24800000000	Uncharacterized protein OS=Trypanosoma cruzi Dm28c OX=1416333 GN=TCDM_05474 PE=4 SV=1
tr|V5BFW9|V5BFW9_TRYCR	2	0.083	0.59	0.335	20400000000	Glycoside hydrolase family 65 central catalytic domain-containing protein OS=Trypanosoma cruzi Dm28c OX=1416333 GN=TCDM_04722 PE=4 SV=1
tr|V5BAT7|V5BAT7_TRYCR	1	0.207	0	0.125	26300000000	Uncharacterized protein OS=Trypanosoma cruzi Dm28c OX=1416333 GN=TCDM_13998 PE=4 SV=1
tr|V5DS90|V5DS90_TRYCR	2	0.23	0.52	0.361	6010000000	Phosphate transporter OS=Trypanosoma cruzi Dm28c OX=1416333 GN=TCDM_01073 PE=3 SV=1
tr|V5DTM1|V5DTM1_TRYCR	1	0.361	0	0.176	5700000000	Enkurin domain-containing protein OS=Trypanosoma cruzi Dm28c OX=1416333 GN=TCDM_00551 PE=4 SV=1
tr|V5D6H9|V5D6H9_TRYCR	1	0.191	0	0.119	23900000000	ATP-dependent RNA helicase OS=Trypanosoma cruzi Dm28c OX=1416333 GN=TCDM_09236 PE=4 SV=1
tr|V5BR07|V5BR07_TRYCR	2	0.102	0.7	0.378	24700000000	Sialidase domain-containing protein OS=Trypanosoma cruzi Dm28c OX=1416333 GN=TCDM_04365 PE=4 SV=1
tr|V5BD21|V5BD21_TRYCR	2	0.082	0.63	0.348	202000000	Serine aminopeptidase S33 domain-containing protein OS=Trypanosoma cruzi Dm28c OX=1416333 GN=TCDM_00223 PE=4 SV=1
tr|V5DLE3|V5DLE3_TRYCR	2	0.988	0.73	0.684	0.000904079	Pentacotripeptide-repeat region of PRORP domain-containing protein OS=Trypanosoma cruzi Dm28c OX=1416333 GN=TCDM_02994 PE=4 SV=1
tr|V5AU66|V5AU66_TRYCR	2	0.418	0.73	0.494	146000000000	Uncharacterized protein OS=Trypanosoma cruzi Dm28c OX=1416333 GN=TCDM_07583 PE=4 SV=1
tr|V5B9S2|V5B9S2_TRYCR	2	0.116	0.71	0.386	28100000000	Uncharacterized protein OS=Trypanosoma cruzi Dm28c OX=1416333 GN=TCDM_07553 PE=4 SV=1
tr|V5BNS7|V5BNS7_TRYCR	2	0.074	0.55	0.319	18400000000	Centrin OS=Trypanosoma cruzi Dm28c OX=1416333 GN=TCDM_14119 PE=4 SV=1
tr|V5BJX8|V5BJX8_TRYCR	2	0.061	0.56	0.318	15500000000	EF-hand domain-containing protein OS=Trypanosoma cruzi Dm28c OX=1416333 GN=TCDM_03221 PE=4 SV=1
tr|V5B376|V5B376_TRYCR	2	0.097	0.6	0.343	2370000000	3-dehydrosphinganine reductase OS=Trypanosoma cruzi Dm28c OX=1416333 GN=TCDM_03694 PE=3 SV=1
tr|V5BQ87|V5BQ87_TRYCR	2	0.105	0.64	0.359	2540000000	C2 domain-containing protein OS=Trypanosoma cruzi Dm28c OX=1416333 GN=TCDM_02908 PE=4 SV=1
tr|V5B0G4|V5B0G4_TRYCR	2	0.066	0.51	0.303	1680000000	Glycoside hydrolase family 65 C-terminal domain-containing protein OS=Trypanosoma cruzi Dm28c OX=1416333 GN=TCDM_04723 PE=4 SV=1
tr|V5B7M8|V5B7M8_TRYCR	2	0.038	0.64	0.337	10700000000	Serine/threonine-protein phosphatase 4 regulatory subunit 3-like central domain-containing protein OS=Trypanosoma cruzi Dm28c OX=1416333 GN=TCDM_08579 PE=4 SV=1
tr|V5B3D2|V5B3D2_TRYCR	2	0.045	0.57	0.316	12300000000	Transcription elongation factor SPT6 OS=Trypanosoma cruzi Dm28c OX=1416333 GN=TCDM_10294 PE=4 SV=1
tr|V5DQ35|V5DQ35_TRYCR	2	0.071	0.56	0.321	17900000000	RNA-editing complex protein OS=Trypanosoma cruzi Dm28c OX=1416333 GN=TCDM_01805 PE=4 SV=1
tr|V5DJ68|V5DJ68_TRYCR	1	0.324	0	0.164	482000000	Uncharacterized protein OS=Trypanosoma cruzi Dm28c OX=1416333 GN=TCDM_03898 PE=4 SV=1
tr|V5B9Y1|V5B9Y1_TRYCR	2	0.19	0.58	0.368	4760000000	General transcription factor IIH subunit 4 OS=Trypanosoma cruzi Dm28c OX=1416333 GN=TCDM_01158 PE=3 SV=1
tr|V5BPM9|V5BPM9_TRYCR	2	0.213	0.65	0.399	5460000000	Transmembrane protein 231 OS=Trypanosoma cruzi Dm28c OX=1416333 GN=TCDM_01490 PE=4 SV=1
tr|V5BPR9|V5BPR9_TRYCR	2	0.09	0.56	0.328	22100000000	Putative nucleobase transporter OS=Trypanosoma cruzi Dm28c OX=1416333 GN=TCDM_03122 PE=3 SV=1
tr|V5ARW7|V5ARW7_TRYCR	2	0.029	0.53	0.297	875000000	Transporter OS=Trypanosoma cruzi Dm28c OX=1416333 GN=TCDM_08671 PE=4 SV=1
tr|V5B9B1|V5B9B1_TRYCR	2	0.08	0.62	0.344	19800000000	Uncharacterized protein OS=Trypanosoma cruzi Dm28c OX=1416333 GN=TCDM_07738 PE=4 SV=1
tr|V5DDQ1|V5DDQ1_TRYCR	2	0.03	0.52	0.294	903000000	HECT domain-containing protein OS=Trypanosoma cruzi Dm28c OX=1416333 GN=TCDM_06014 PE=4 SV=1
tr|V5BP80|V5BP80_TRYCR	2	0.041	0.52	0.298	11300000000	ATP synthase regulation protein NCA2 OS=Trypanosoma cruzi Dm28c OX=1416333 GN=TCDM_01575 PE=4 SV=1
tr|V5B9Q0|V5B9Q0_TRYCR	2	0.035	0.56	0.309	99900000	33 kDa inner dynein arm light chain OS=Trypanosoma cruzi Dm28c OX=1416333 GN=TCDM_01085 PE=3 SV=1
tr|V5BP71|V5BP71_TRYCR	2	0.005	0.57	0.303	280000000	Uncharacterized protein OS=Trypanosoma cruzi Dm28c OX=1416333 GN=TCDM_01562 PE=4 SV=1
tr|V5DG34|V5DG34_TRYCR	2	0.097	0.55	0.327	2360000000	Uncharacterized protein OS=Trypanosoma cruzi Dm28c OX=1416333 GN=TCDM_05025 PE=4 SV=1
tr|V5B864|V5B864_TRYCR	2	0.078	0.61	0.34	19300000000	AAA+ ATPase domain-containing protein OS=Trypanosoma cruzi Dm28c OX=1416333 GN=TCDM_08254 PE=3 SV=1
tr|V5BP17|V5BP17_TRYCR	1	0.221	0	0.129	2860000000	Choline/carnitine acyltransferase domain-containing protein OS=Trypanosoma cruzi Dm28c OX=1416333 GN=TCDM_01809 PE=3 SV=1
tr|V5BBH0|V5BBH0_TRYCR	2	0.042	0.59	0.322	11600000000	Uncharacterized protein OS=Trypanosoma cruzi Dm28c OX=1416333 GN=TCDM_08806 PE=4 SV=1
tr|V5B4J3|V5B4J3_TRYCR	2	0.04	0.52	0.298	11100000000	F-box domain-containing protein OS=Trypanosoma cruzi Dm28c OX=1416333 GN=TCDM_03058 PE=4 SV=1
tr|V5BQ98|V5BQ98_TRYCR	2	0.039	0.6	0.324	10800000000	Immunodominant antigen OS=Trypanosoma cruzi Dm28c OX=1416333 GN=TCDM_02920 PE=4 SV=1
tr|V5ATQ3|V5ATQ3_TRYCR	2	0.015	0.53	0.293	559000000	Uncharacterized protein OS=Trypanosoma cruzi Dm28c OX=1416333 GN=TCDM_07806 PE=4 SV=1
tr|V5CZD8|V5CZD8_TRYCR	2	0.094	0.65	0.359	22900000000	Myosin heavy chain OS=Trypanosoma cruzi Dm28c OX=1416333 GN=TCDM_11908 PE=4 SV=1
tr|V5ATL9|V5ATL9_TRYCR	2	0.137	0.52	0.33	3320000000	Sodium/sulfate symporter OS=Trypanosoma cruzi Dm28c OX=1416333 GN=TCDM_07846 PE=4 SV=1
tr|V5DP06|V5DP06_TRYCR	2	0.063	0.65	0.349	16000000000	Ubiquitin-like domain-containing protein OS=Trypanosoma cruzi Dm28c OX=1416333 GN=TCDM_14137 PE=4 SV=1
tr|V5DSY9|V5DSY9_TRYCR	2	0.186	0.55	0.356	4650000000	Pumilio OS=Trypanosoma cruzi Dm28c OX=1416333 GN=TCDM_00629 PE=4 SV=1
tr|V5B930|V5B930_TRYCR	2	0.018	0.53	0.294	627000000	Uncharacterized protein OS=Trypanosoma cruzi Dm28c OX=1416333 GN=TCDM_07852 PE=4 SV=1
tr|V5B9N8|V5B9N8_TRYCR	2	0.134	0.56	0.342	3250000000	NADH dehydrogenase [ubiquinone] 1 alpha subcomplex assembly factor 3 OS=Trypanosoma cruzi Dm28c OX=1416333 GN=TCDM_07609 PE=4 SV=1
tr|V5DH61|V5DH61_TRYCR	2	0.013	0.59	0.312	491000000	Protein kinase OS=Trypanosoma cruzi Dm28c OX=1416333 GN=TCDM_04577 PE=4 SV=1
tr|V5AWF7|V5AWF7_TRYCR	2	0.152	0.61	0.365	3720000000	Choline transporter-like protein OS=Trypanosoma cruzi Dm28c OX=1416333 GN=TCDM_06579 PE=3 SV=1
tr|V5BRC6|V5BRC6_TRYCR	2	0.094	0.62	0.349	22900000000	Cyclic nucleotide-binding domain-containing protein OS=Trypanosoma cruzi Dm28c OX=1416333 GN=TCDM_02422 PE=4 SV=1
tr|V5BNG3|V5BNG3_TRYCR	2	0.039	0.6	0.324	10900000000	RNA-binding protein OS=Trypanosoma cruzi Dm28c OX=1416333 GN=TCDM_05314 PE=4 SV=1
tr|V5B6J8|V5B6J8_TRYCR	1	0.939	0	0.369	0.000136475	Aldo-keto reductase OS=Trypanosoma cruzi Dm28c OX=1416333 GN=TCDM_08978 PE=3 SV=1
tr|V5D6Q9|V5D6Q9_TRYCR	2	0.189	0.68	0.401	4720000000	Uncharacterized protein OS=Trypanosoma cruzi Dm28c OX=1416333 GN=TCDM_09130 PE=4 SV=1
tr|V5BJL8|V5BJL8_TRYCR	1	0.575	0	0.247	141000000000	Nucleolar protein 16 OS=Trypanosoma cruzi Dm28c OX=1416333 GN=TCDM_03277 PE=3 SV=1
tr|V5DBR8|V5DBR8_TRYCR	2	0.071	0.6	0.335	17900000000	Uncharacterized protein OS=Trypanosoma cruzi Dm28c OX=1416333 GN=TCDM_06914 PE=4 SV=1
tr|V5BF46|V5BF46_TRYCR	1	0.531	0	0.233	11800000000	Uncharacterized protein OS=Trypanosoma cruzi Dm28c OX=1416333 GN=TCDM_04989 PE=4 SV=1
tr|V5DB66|V5DB66_TRYCR	1	0.402	0	0.19	6820000000	D-alanyl-glycyl endopeptidase-like protein OS=Trypanosoma cruzi Dm28c OX=1416333 GN=TCDM_07203 PE=4 SV=1
tr|V5DQ92|V5DQ92_TRYCR	2	0.504	0.6	0.479	209000000000	Putative dynein heavy chain OS=Trypanosoma cruzi Dm28c OX=1416333 GN=TCDM_01539 PE=4 SV=1
tr|V5BPJ5|V5BPJ5_TRYCR	3	0.073	0.58	0.384	27300000000	Uncharacterized protein OS=Trypanosoma cruzi Dm28c OX=1416333 GN=TCDM_03217 PE=4 SV=1
tr|V5BRU2|V5BRU2_TRYCR	4	0.122	0.6	0.463	5910000000	MIF4G domain-containing protein OS=Trypanosoma cruzi Dm28c OX=1416333 GN=TCDM_00683 PE=4 SV=1
tr|V5B6K4|V5B6K4_TRYCR	2	0.935	0.72	0.663	0.000255992	Uncharacterized protein OS=Trypanosoma cruzi Dm28c OX=1416333 GN=TCDM_02392 PE=4 SV=1
tr|V5BF40|V5BF40_TRYCR	1	0.251	0	0.139	33700000000	GRIP domain-containing protein OS=Trypanosoma cruzi Dm28c OX=1416333 GN=TCDM_07171 PE=4 SV=1
tr|V5BVR1|V5BVR1_TRYCR	1	0.485	0	0.217	9690000000	Uncharacterized protein OS=Trypanosoma cruzi Dm28c OX=1416333 GN=TCDM_02518 PE=4 SV=1
tr|V5C320|V5C320_TRYCR	4	0.279	0.64	0.529	155000000000	Heat shock factor binding protein 1 OS=Trypanosoma cruzi Dm28c OX=1416333 GN=TCDM_13795 PE=3 SV=1
tr|V5DB11|V5DB11_TRYCR	2	0.112	0.63	0.358	27200000000	Uncharacterized protein OS=Trypanosoma cruzi Dm28c OX=1416333 GN=TCDM_13861 PE=4 SV=1
tr|V5D2J6|V5D2J6_TRYCR	2	0.083	0.64	0.352	20500000000	RecQ-mediated genome instability protein 1 OS=Trypanosoma cruzi Dm28c OX=1416333 GN=TCDM_10699 PE=3 SV=1
tr|V5BC20|V5BC20_TRYCR	4	0.084	0.59	0.447	4130000000	Uncharacterized protein OS=Trypanosoma cruzi Dm28c OX=1416333 GN=TCDM_08564 PE=4 SV=1
tr|V5AU30|V5AU30_TRYCR	2	0.022	0.66	0.338	72300000	Zorya protein ZorC EH domain-containing protein OS=Trypanosoma cruzi Dm28c OX=1416333 GN=TCDM_07626 PE=4 SV=1
tr|V5BHR1|V5BHR1_TRYCR	2	0.038	0.57	0.314	10800000000	ENTH domain-containing protein OS=Trypanosoma cruzi Dm28c OX=1416333 GN=TCDM_04063 PE=4 SV=1
tr|V5BFA7|V5BFA7_TRYCR	2	0.016	0.52	0.29	566000000	Proteasome assembly chaperone 3 OS=Trypanosoma cruzi Dm28c OX=1416333 GN=TCDM_14316 PE=4 SV=1
tr|V5BNK6|V5BNK6_TRYCR	2	0.06	0.66	0.351	15400000000	Guanine nucleotide-binding protein subunit beta-like protein OS=Trypanosoma cruzi Dm28c OX=1416333 GN=TCDM_05251 PE=4 SV=1
tr|V5DEF7|V5DEF7_TRYCR	2	0.173	0.69	0.399	4280000000	Uncharacterized protein OS=Trypanosoma cruzi Dm28c OX=1416333 GN=TCDM_05665 PE=4 SV=1
tr|V5DRZ7|V5DRZ7_TRYCR	2	0.072	0.57	0.325	18100000000	PPIase cyclophilin-type domain-containing protein OS=Trypanosoma cruzi Dm28c OX=1416333 GN=TCDM_00955 PE=4 SV=1
tr|V5B915|V5B915_TRYCR	6	0.119	0.59	0.57	8660000000	Histone chaperone ASF1B OS=Trypanosoma cruzi Dm28c OX=1416333 GN=TCDM_13915 PE=3 SV=1
tr|V5B9B0|V5B9B0_TRYCR	2	0.024	0.56	0.306	764000000	C3H1-type domain-containing protein OS=Trypanosoma cruzi Dm28c OX=1416333 GN=TCDM_01281 PE=4 SV=1
tr|V5B9D8|V5B9D8_TRYCR	2	0.049	0.54	0.307	13100000000	Uncharacterized protein OS=Trypanosoma cruzi Dm28c OX=1416333 GN=TCDM_01317 PE=4 SV=1
tr|V5D5P4|V5D5P4_TRYCR	2	0.021	0.66	0.338	684000000	Hd phosphohydrolase family protein OS=Trypanosoma cruzi Dm28c OX=1416333 GN=TCDM_09497 PE=4 SV=1
tr|V5DMH3|V5DMH3_TRYCR	2	0.04	0.52	0.298	11200000000	Dynamin N-terminal domain-containing protein OS=Trypanosoma cruzi Dm28c OX=1416333 GN=TCDM_02522 PE=4 SV=1
tr|V5BYY0|V5BYY0_TRYCR	2	0.033	0.64	0.335	95400000	Uncharacterized protein OS=Trypanosoma cruzi Dm28c OX=1416333 GN=TCDM_01449 PE=4 SV=1
tr|V5DKG4|V5DKG4_TRYCR	3	0.147	0.6	0.416	5360000000	RNA 3'-terminal phosphate cyclase-like protein OS=Trypanosoma cruzi Dm28c OX=1416333 GN=TCDM_03424 PE=3 SV=1
tr|V5B9P3|V5B9P3_TRYCR	6	0.06	0.65	0.57	4650000000	NUDIX hydrolase OS=Trypanosoma cruzi Dm28c OX=1416333 GN=TCDM_07617 PE=4 SV=1
tr|V5BCE0|V5BCE0_TRYCR	6	0.293	0.61	0.634	25000000000	Serine aminopeptidase S33 domain-containing protein OS=Trypanosoma cruzi Dm28c OX=1416333 GN=TCDM_06305 PE=4 SV=1
tr|V5BED6|V5BED6_TRYCR	2	0.036	0.63	0.333	10300000000	RNA-binding protein 4 OS=Trypanosoma cruzi Dm28c OX=1416333 GN=TCDM_05326 PE=4 SV=1
tr|V5DKF7|V5DKF7_TRYCR	6	0.059	0.56	0.54	4550000000	Thiopurine S-methyltransferase OS=Trypanosoma cruzi Dm28c OX=1416333 GN=TCDM_03419 PE=4 SV=1
tr|V5D978|V5D978_TRYCR	2	0.81	0.73	0.624	89300000000	Dynein heavy chain OS=Trypanosoma cruzi Dm28c OX=1416333 GN=TCDM_08047 PE=4 SV=1
tr|V5BKJ3|V5BKJ3_TRYCR	2	0.004	0.59	0.309	2370000000	Protein kinase OS=Trypanosoma cruzi Dm28c OX=1416333 GN=TCDM_04752 PE=4 SV=1
tr|V5D565|V5D565_TRYCR	2	0.201	0.68	0.405	5080000000	Exosome-associated protein 1 OS=Trypanosoma cruzi Dm28c OX=1416333 GN=TCDM_09755 PE=3 SV=1
tr|V5BBA9|V5BBA9_TRYCR	2	0.033	0.58	0.315	963000000	Tudor domain-containing protein OS=Trypanosoma cruzi Dm28c OX=1416333 GN=TCDM_06810 PE=4 SV=1
tr|V5BCN7|V5BCN7_TRYCR	1	0.306	0	0.158	44300000000	SURP motif domain-containing protein OS=Trypanosoma cruzi Dm28c OX=1416333 GN=TCDM_10206 PE=4 SV=1
tr|V5BCA8|V5BCA8_TRYCR	2	0.058	0.54	0.31	14900000000	Uncharacterized protein OS=Trypanosoma cruzi Dm28c OX=1416333 GN=TCDM_06256 PE=4 SV=1
tr|V5AZ19|V5AZ19_TRYCR	6	0.171	0.63	0.6	12700000000	Actin-related protein 2 OS=Trypanosoma cruzi Dm28c OX=1416333 GN=TCDM_05333 PE=3 SV=1
tr|V5B0A5|V5B0A5_TRYCR	4	0.033	0.62	0.44	1910000000	UDP-glucose 6-dehydrogenase OS=Trypanosoma cruzi Dm28c OX=1416333 GN=TCDM_04774 PE=3 SV=1
tr|V5BB96|V5BB96_TRYCR	1	0.626	0	0.264	17600000000	Myosin heavy chain OS=Trypanosoma cruzi Dm28c OX=1416333 GN=TCDM_08875 PE=3 SV=1
tr|V5BC84|V5BC84_TRYCR	2	0.019	0.53	0.294	637000000	C2H2-type domain-containing protein OS=Trypanosoma cruzi Dm28c OX=1416333 GN=TCDM_06345 PE=3 SV=1
tr|V5BQT7|V5BQT7_TRYCR	2	0.069	0.59	0.331	1730000000	RNA uridylyltransferase OS=Trypanosoma cruzi Dm28c OX=1416333 GN=TCDM_01010 PE=4 SV=1
tr|V5AWF3|V5AWF3_TRYCR	2	0.015	0.71	0.353	556000000	G10 protein OS=Trypanosoma cruzi Dm28c OX=1416333 GN=TCDM_06572 PE=3 SV=1
tr|V5AZU7|V5AZU7_TRYCR	4	0.372	0.76	0.6	239000000000	nicotinate phosphoribosyltransferase OS=Trypanosoma cruzi Dm28c OX=1416333 GN=TCDM_04910 PE=3 SV=1
tr|V5B971|V5B971_TRYCR	2	0.01	0.62	0.321	4260000000	HD domain-containing protein OS=Trypanosoma cruzi Dm28c OX=1416333 GN=TCDM_09794 PE=4 SV=1
tr|V5BQK6|V5BQK6_TRYCR	4	0.202	0.62	0.496	103000000000	PUB domain-containing protein OS=Trypanosoma cruzi Dm28c OX=1416333 GN=TCDM_01233 PE=4 SV=1
tr|V5BIJ5|V5BIJ5_TRYCR	2	0.039	0.51	0.294	110000000	C2H2-type domain-containing protein OS=Trypanosoma cruzi Dm28c OX=1416333 GN=TCDM_05555 PE=4 SV=1
tr|V5BB49|V5BB49_TRYCR	2	0.019	0.58	0.311	653000000	Chromatin binding protein OS=Trypanosoma cruzi Dm28c OX=1416333 GN=TCDM_00622 PE=4 SV=1
tr|V5BSW5|V5BSW5_TRYCR	2	0.184	0.53	0.349	4590000000	Cleavage and polyadenylation specificity factor subunit 2 OS=Trypanosoma cruzi Dm28c OX=1416333 GN=TCDM_02045 PE=3 SV=1
tr|V5BLW4|V5BLW4_TRYCR	2	0.083	0.71	0.375	20400000000	non-specific serine/threonine protein kinase OS=Trypanosoma cruzi Dm28c OX=1416333 GN=TCDM_04221 PE=3 SV=1
tr|V5B3F7|V5B3F7_TRYCR	5	0.406	0.85	0.696	34600000000	Hydroxymethylglutaryl-CoA lyase OS=Trypanosoma cruzi Dm28c OX=1416333 GN=TCDM_03612 PE=4 SV=1
tr|V5DKP0|V5DKP0_TRYCR	3	0.032	0.56	0.364	14100000000	Arp2/3 complex 34 kDa subunit OS=Trypanosoma cruzi Dm28c OX=1416333 GN=TCDM_03297 PE=3 SV=1
tr|V5D7H9|V5D7H9_TRYCR	4	0.045	0.63	0.447	2460000000	Kinesin-like protein OS=Trypanosoma cruzi Dm28c OX=1416333 GN=TCDM_08777 PE=3 SV=1
tr|V5BF17|V5BF17_TRYCR	2	0.145	0.52	0.333	35300000000	Cytoskeleton associated protein OS=Trypanosoma cruzi Dm28c OX=1416333 GN=TCDM_07220 PE=4 SV=1
tr|V5DG78|V5DG78_TRYCR	2	0.828	0.55	0.57	99900000000	Uncharacterized protein OS=Trypanosoma cruzi Dm28c OX=1416333 GN=TCDM_04924 PE=4 SV=1
tr|V5DJQ1|V5DJQ1_TRYCR	2	0.024	0.5	0.286	768000000	RRM domain-containing protein OS=Trypanosoma cruzi Dm28c OX=1416333 GN=TCDM_03703 PE=4 SV=1
tr|V5DF84|V5DF84_TRYCR	2	0.223	0.54	0.365	5790000000	Uncharacterized protein OS=Trypanosoma cruzi Dm28c OX=1416333 GN=TCDM_05427 PE=4 SV=1
tr|V5B677|V5B677_TRYCR	4	0.076	0.55	0.431	37800000000	PX domain-containing protein OS=Trypanosoma cruzi Dm28c OX=1416333 GN=TCDM_02454 PE=4 SV=1
tr|V5BHN9|V5BHN9_TRYCR	4	0.726	0.75	0.714	0.000112307	EF-hand domain-containing protein OS=Trypanosoma cruzi Dm28c OX=1416333 GN=TCDM_05979 PE=4 SV=1
tr|V5BGH1|V5BGH1_TRYCR	1	0.638	0	0.268	185000000000	Trichohyalin OS=Trypanosoma cruzi Dm28c OX=1416333 GN=TCDM_04521 PE=4 SV=1
tr|V5BBC9|V5BBC9_TRYCR	2	0.971	0.73	0.678	0.00048893	DNA repair protein RAD2 OS=Trypanosoma cruzi Dm28c OX=1416333 GN=TCDM_06722 PE=4 SV=1
tr|V5BGZ1|V5BGZ1_TRYCR	2	0.096	0.56	0.33	2340000000	Uncharacterized protein OS=Trypanosoma cruzi Dm28c OX=1416333 GN=TCDM_08334 PE=4 SV=1
tr|V5C2M3|V5C2M3_TRYCR	2	0.102	0.56	0.332	24700000000	Uncharacterized protein OS=Trypanosoma cruzi Dm28c OX=1416333 GN=TCDM_00020 PE=4 SV=1
tr|V5BJE1|V5BJE1_TRYCR	1	0.793	0	0.32	402000000000	Uncharacterized protein OS=Trypanosoma cruzi Dm28c OX=1416333 GN=TCDM_03412 PE=4 SV=1
tr|V5B4D1|V5B4D1_TRYCR	2	0.808	0.67	0.604	8790000000	Uncharacterized protein OS=Trypanosoma cruzi Dm28c OX=1416333 GN=TCDM_03174 PE=4 SV=1
tr|V5BD37|V5BD37_TRYCR	2	0.123	0.53	0.329	29700000000	Elks delta-like protein OS=Trypanosoma cruzi Dm28c OX=1416333 GN=TCDM_05992 PE=4 SV=1
tr|V5BY91|V5BY91_TRYCR	2	0.409	0.73	0.491	141000000000	Uncharacterized protein OS=Trypanosoma cruzi Dm28c OX=1416333 GN=TCDM_13762 PE=4 SV=1
tr|V5BLK6|V5BLK6_TRYCR	1	0.431	0	0.199	7710000000	Uncharacterized protein OS=Trypanosoma cruzi Dm28c OX=1416333 GN=TCDM_02597 PE=4 SV=1
tr|V5ARH3|V5ARH3_TRYCR	1	0.714	0	0.294	265000000000	Coiled-coil domain-containing protein 13 OS=Trypanosoma cruzi Dm28c OX=1416333 GN=TCDM_08829 PE=4 SV=1
tr|V5BS35|V5BS35_TRYCR	2	0.295	0.6	0.409	8370000000	Uncharacterized protein OS=Trypanosoma cruzi Dm28c OX=1416333 GN=TCDM_02267 PE=4 SV=1
tr|V5BL83|V5BL83_TRYCR	2	0.221	0.72	0.425	5710000000	Leucine-rich repeat protein (LRRP) OS=Trypanosoma cruzi Dm28c OX=1416333 GN=TCDM_06415 PE=4 SV=1
tr|V5CZR9|V5CZR9_TRYCR	6	0.285	0.56	0.615	24000000000	Retrotransposon hot spot (RHS) protein OS=Trypanosoma cruzi Dm28c OX=1416333 GN=TCDM_11728 PE=4 SV=1
tr|V5BPJ2|V5BPJ2_TRYCR	4	0.782	0.63	0.693	0.000151157	Flagellar Member 4 OS=Trypanosoma cruzi Dm28c OX=1416333 GN=TCDM_04850 PE=4 SV=1
tr|V5B8C1|V5B8C1_TRYCR	2	0.193	0.59	0.372	4860000000	5-methylcytosine rRNA methyltransferase NSUN4 OS=Trypanosoma cruzi Dm28c OX=1416333 GN=TCDM_10103 PE=3 SV=1
tr|V5BQH6|V5BQH6_TRYCR	2	0.171	0.52	0.341	4220000000	non-specific serine/threonine protein kinase OS=Trypanosoma cruzi Dm28c OX=1416333 GN=TCDM_01191 PE=3 SV=1
tr|V5C306|V5C306_TRYCR	3	0.097	0.57	0.389	35600000000	Syntaxin OS=Trypanosoma cruzi Dm28c OX=1416333 GN=TCDM_00232 PE=3 SV=1
tr|V5B173|V5B173_TRYCR	1	0.193	0	0.12	24300000000	Peptide deformylase OS=Trypanosoma cruzi Dm28c OX=1416333 GN=TCDM_04458 PE=3 SV=1
tr|V5BUS4|V5BUS4_TRYCR	1	0.23	0	0.132	3010000000	CDC16 OS=Trypanosoma cruzi Dm28c OX=1416333 GN=TCDM_02873 PE=4 SV=1
tr|V5BLJ1|V5BLJ1_TRYCR	3	0.018	0.55	0.356	93600000	SUI1 domain-containing protein OS=Trypanosoma cruzi Dm28c OX=1416333 GN=TCDM_02569 PE=4 SV=1
tr|V5BDT6|V5BDT6_TRYCR	4	0.624	0.83	0.707	69800000000	ATP-dependent RNA helicase OS=Trypanosoma cruzi Dm28c OX=1416333 GN=TCDM_05633 PE=3 SV=1
tr|V5BK27|V5BK27_TRYCR	3	0.098	0.62	0.406	35600000000	Uncharacterized protein OS=Trypanosoma cruzi Dm28c OX=1416333 GN=TCDM_03071 PE=4 SV=1
tr|V5BTF7|V5BTF7_TRYCR	4	0.67	0.68	0.672	85700000000	Fumarylacetoacetase-like C-terminal domain-containing protein OS=Trypanosoma cruzi Dm28c OX=1416333 GN=TCDM_03348 PE=3 SV=1
tr|V5BF34|V5BF34_TRYCR	4	0.168	0.69	0.508	82900000	CNH domain-containing protein OS=Trypanosoma cruzi Dm28c OX=1416333 GN=TCDM_04969 PE=3 SV=1
tr|V5BAG8|V5BAG8_TRYCR	4	0.12	0.64	0.476	5830000000	PCIF1 WW domain-containing protein OS=Trypanosoma cruzi Dm28c OX=1416333 GN=TCDM_07250 PE=4 SV=1
tr|V5AZY6|V5AZY6_TRYCR	4	0.208	0.72	0.532	106000000000	RNA-binding protein OS=Trypanosoma cruzi Dm28c OX=1416333 GN=TCDM_04959 PE=4 SV=1
tr|V5B213|V5B213_TRYCR	2	0.075	0.69	0.366	18700000000	Centromere protein J C-terminal domain-containing protein OS=Trypanosoma cruzi Dm28c OX=1416333 GN=TCDM_04110 PE=3 SV=1
tr|V5BRC4|V5BRC4_TRYCR	4	0.377	0.82	0.621	24400000000	Cap-specific mRNA (nucleoside-2'-O-)-methyltransferase OS=Trypanosoma cruzi Dm28c OX=1416333 GN=TCDM_00895 PE=4 SV=1
tr|V5BI79|V5BI79_TRYCR	2	0.099	0.72	0.384	2420000000	tRNA nucleotidyltransferase OS=Trypanosoma cruzi Dm28c OX=1416333 GN=TCDM_05645 PE=3 SV=1
tr|V5BSR7|V5BSR7_TRYCR	4	0.267	0.58	0.505	146000000000	Uncharacterized protein OS=Trypanosoma cruzi Dm28c OX=1416333 GN=TCDM_00366 PE=4 SV=1
tr|V5BP68|V5BP68_TRYCR	3	0.037	0.66	0.399	1560000000	Uncharacterized protein OS=Trypanosoma cruzi Dm28c OX=1416333 GN=TCDM_04988 PE=4 SV=1
tr|V5BTL6|V5BTL6_TRYCR	4	0.527	0.59	0.595	462000000000	Uncharacterized protein OS=Trypanosoma cruzi Dm28c OX=1416333 GN=TCDM_01806 PE=4 SV=1
tr|V5AQC4|V5AQC4_TRYCR	2	0.153	0.73	0.405	37300000000	Uncharacterized protein OS=Trypanosoma cruzi Dm28c OX=1416333 GN=TCDM_09282 PE=4 SV=1
tr|V5BDS9|V5BDS9_TRYCR	2	0.054	0.5	0.296	14100000000	PDEase domain-containing protein OS=Trypanosoma cruzi Dm28c OX=1416333 GN=TCDM_07831 PE=4 SV=1
tr|V5BJH0|V5BJH0_TRYCR	4	0.091	0.61	0.456	44700000000	Inositol-1-monophosphatase OS=Trypanosoma cruzi Dm28c OX=1416333 GN=TCDM_05171 PE=3 SV=1
tr|V5BQC3|V5BQC3_TRYCR	4	0.023	0.66	0.45	1470000000	Uncharacterized protein OS=Trypanosoma cruzi Dm28c OX=1416333 GN=TCDM_04573 PE=4 SV=1
tr|V5B895|V5B895_TRYCR	3	0.026	0.62	0.382	12200000000	Leucine-rich repeat-containing protein 51 OS=Trypanosoma cruzi Dm28c OX=1416333 GN=TCDM_08186 PE=4 SV=1
tr|V5DCJ5|V5DCJ5_TRYCR	2	0.062	0.56	0.318	15800000000	SAM-dependent MTase RsmB/NOP-type domain-containing protein OS=Trypanosoma cruzi Dm28c OX=1416333 GN=TCDM_06574 PE=3 SV=1
tr|V5B8T9|V5B8T9_TRYCR	2	0.317	0.7	0.45	9300000000	PRORP domain-containing protein OS=Trypanosoma cruzi Dm28c OX=1416333 GN=TCDM_01668 PE=3 SV=1
tr|V5BM57|V5BM57_TRYCR	2	0.065	0.57	0.323	16400000000	Replication factor C OS=Trypanosoma cruzi Dm28c OX=1416333 GN=TCDM_05960 PE=4 SV=1
tr|V5DQL3|V5DQL3_TRYCR	2	0.095	0.62	0.349	23100000000	Splicing factor 3a OS=Trypanosoma cruzi Dm28c OX=1416333 GN=TCDM_01410 PE=3 SV=1
tr|V5DMN4|V5DMN4_TRYCR	2	0.178	0.62	0.377	44300000000	Myosin heavy chain OS=Trypanosoma cruzi Dm28c OX=1416333 GN=TCDM_02637 PE=4 SV=1
tr|V5AUS2|V5AUS2_TRYCR	4	0.053	0.61	0.443	27900000000	GPI transamidase component Tta1 OS=Trypanosoma cruzi Dm28c OX=1416333 GN=TCDM_07355 PE=4 SV=1
tr|V5BE82|V5BE82_TRYCR	2	0.022	0.54	0.298	726000000	Oxidoreductase OS=Trypanosoma cruzi Dm28c OX=1416333 GN=TCDM_07585 PE=3 SV=1
tr|V5BHW6|V5BHW6_TRYCR	2	0.297	0.71	0.447	848000000	Plus3 domain-containing protein OS=Trypanosoma cruzi Dm28c OX=1416333 GN=TCDM_05870 PE=4 SV=1
tr|V5B6K0|V5B6K0_TRYCR	2	0.763	0.63	0.575	67900000000	Small-subunit processome Utp12 domain-containing protein OS=Trypanosoma cruzi Dm28c OX=1416333 GN=TCDM_02384 PE=3 SV=1
tr|V5DRF7|V5DRF7_TRYCR	2	0.199	0.52	0.351	5040000000	Mannosyltransferase OS=Trypanosoma cruzi Dm28c OX=1416333 GN=TCDM_01114 PE=3 SV=1
tr|V5AMS7|V5AMS7_TRYCR	3	0.098	0.62	0.406	35800000000	Methyltransferase type 11 domain-containing protein OS=Trypanosoma cruzi Dm28c OX=1416333 GN=TCDM_10377 PE=4 SV=1
tr|V5B617|V5B617_TRYCR	2	0.673	0.73	0.579	43500000000	Non-specific serine/threonine protein kinase OS=Trypanosoma cruzi Dm28c OX=1416333 GN=TCDM_09226 PE=4 SV=1
tr|V5BRU5|V5BRU5_TRYCR	2	0.1	0.7	0.378	24300000000	ATPase OS=Trypanosoma cruzi Dm28c OX=1416333 GN=TCDM_00690 PE=3 SV=1
tr|V5DPG9|V5DPG9_TRYCR	2	0.197	0.64	0.39	4960000000	Uncharacterized protein OS=Trypanosoma cruzi Dm28c OX=1416333 GN=TCDM_01824 PE=4 SV=1
tr|V5DR48|V5DR48_TRYCR	2	0.085	0.59	0.336	2090000000	Cytosolic Fe-S cluster assembly factor NUBP2 homolog OS=Trypanosoma cruzi Dm28c OX=1416333 GN=TCDM_01354 PE=3 SV=1
tr|V5B2Q8|V5B2Q8_TRYCR	2	0.006	0.64	0.326	312000000	Band 7 domain-containing protein OS=Trypanosoma cruzi Dm28c OX=1416333 GN=TCDM_10497 PE=4 SV=1
tr|V5D1K6|V5D1K6_TRYCR	2	0.135	0.71	0.393	32800000000	Small G-protein OS=Trypanosoma cruzi Dm28c OX=1416333 GN=TCDM_11061 PE=3 SV=1
tr|V5BGI7|V5BGI7_TRYCR	4	0.067	0.57	0.435	33700000000	Importin N-terminal domain-containing protein OS=Trypanosoma cruzi Dm28c OX=1416333 GN=TCDM_06515 PE=4 SV=1
tr|V5AKS5|V5AKS5_TRYCR	2	0.05	0.67	0.351	1330000000	Proteasome 26S non-ATPase subunit 9 OS=Trypanosoma cruzi Dm28c OX=1416333 GN=TCDM_11146 PE=4 SV=1
tr|V5AJ90|V5AJ90_TRYCR	2	0.063	0.61	0.335	16100000000	Aminomethyltransferase folate-binding domain-containing protein OS=Trypanosoma cruzi Dm28c OX=1416333 GN=TCDM_11760 PE=4 SV=1
tr|V5BU08|V5BU08_TRYCR	4	0.15	0.54	0.452	7320000000	NFACT RNA-binding domain-containing protein OS=Trypanosoma cruzi Dm28c OX=1416333 GN=TCDM_01389 PE=3 SV=1
tr|V5BSG8|V5BSG8_TRYCR	2	0.049	0.67	0.351	13000000000	Mitogen-activated protein kinase 5 OS=Trypanosoma cruzi Dm28c OX=1416333 GN=TCDM_02136 PE=4 SV=1
tr|V5AIL9|V5AIL9_TRYCR	2	0.009	0.56	0.301	4050000000	Uncharacterized protein OS=Trypanosoma cruzi Dm28c OX=1416333 GN=TCDM_11994 PE=4 SV=1
tr|V5B7G6|V5B7G6_TRYCR	2	0.028	0.53	0.297	843000000	Uncharacterized protein OS=Trypanosoma cruzi Dm28c OX=1416333 GN=TCDM_08623 PE=4 SV=1
tr|V5BUD1|V5BUD1_TRYCR	2	0.035	0.6	0.323	10000000000	Guanine nucleotide-binding protein subunit beta-like protein OS=Trypanosoma cruzi Dm28c OX=1416333 GN=TCDM_01247 PE=4 SV=1
tr|V5C1R6|V5C1R6_TRYCR	2	0.036	0.59	0.32	10300000000	J domain-containing protein OS=Trypanosoma cruzi Dm28c OX=1416333 GN=TCDM_00498 PE=4 SV=1
tr|V5B639|V5B639_TRYCR	2	0.036	0.57	0.313	10300000000	Protein kinase OS=Trypanosoma cruzi Dm28c OX=1416333 GN=TCDM_09216 PE=4 SV=1
tr|V5BF96|V5BF96_TRYCR	2	0.068	0.57	0.324	17300000000	WW domain-containing protein OS=Trypanosoma cruzi Dm28c OX=1416333 GN=TCDM_04906 PE=4 SV=1
tr|V5DFK1|V5DFK1_TRYCR	2	0.01	0.57	0.304	414000000	Uncharacterized protein OS=Trypanosoma cruzi Dm28c OX=1416333 GN=TCDM_05212 PE=4 SV=1
tr|V5BT58|V5BT58_TRYCR	2	0.016	0.64	0.33	565000000	SET domain-containing protein OS=Trypanosoma cruzi Dm28c OX=1416333 GN=TCDM_01910 PE=4 SV=1
tr|V5BJG9|V5BJG9_TRYCR	2	0.053	0.69	0.359	13900000000	Uncharacterized protein OS=Trypanosoma cruzi Dm28c OX=1416333 GN=TCDM_07296 PE=4 SV=1
tr|V5BXX3|V5BXX3_TRYCR	2	0.055	0.53	0.306	14300000000	Uncharacterized protein OS=Trypanosoma cruzi Dm28c OX=1416333 GN=TCDM_00076 PE=4 SV=1
tr|V5BMH6|V5BMH6_TRYCR	2	0.154	0.66	0.382	3750000000	Dynein axonemal assembly factor 4 OS=Trypanosoma cruzi Dm28c OX=1416333 GN=TCDM_05797 PE=4 SV=1
tr|V5DKP6|V5DKP6_TRYCR	2	0.129	0.59	0.351	3130000000	Uncharacterized protein OS=Trypanosoma cruzi Dm28c OX=1416333 GN=TCDM_03304 PE=4 SV=1
tr|V5AUL7|V5AUL7_TRYCR	2	0.059	0.7	0.364	15200000000	Protein kinase domain-containing protein OS=Trypanosoma cruzi Dm28c OX=1416333 GN=TCDM_07411 PE=4 SV=1
tr|V5D569|V5D569_TRYCR	2	0.044	0.68	0.352	11900000000	Mu-adaptin 4 OS=Trypanosoma cruzi Dm28c OX=1416333 GN=TCDM_09726 PE=3 SV=1
tr|V5BX74|V5BX74_TRYCR	2	0.16	0.54	0.344	39200000000	Uncharacterized protein OS=Trypanosoma cruzi Dm28c OX=1416333 GN=TCDM_02171 PE=4 SV=1
tr|V5BBM7|V5BBM7_TRYCR	2	0.082	0.6	0.338	2020000000	SET domain-containing protein OS=Trypanosoma cruzi Dm28c OX=1416333 GN=TCDM_08725 PE=4 SV=1
tr|V5BAN7|V5BAN7_TRYCR	2	0.018	0.58	0.31	620000000	SAM-dependent MTase RsmB/NOP-type domain-containing protein OS=Trypanosoma cruzi Dm28c OX=1416333 GN=TCDM_07099 PE=3 SV=1
tr|V5B6Y6|V5B6Y6_TRYCR	2	0.055	0.55	0.313	14400000000	3'-phosphate/5'-hydroxy nucleic acid ligase OS=Trypanosoma cruzi Dm28c OX=1416333 GN=TCDM_10623 PE=3 SV=1
tr|V5BSU4|V5BSU4_TRYCR	4	0.092	0.68	0.48	44800000000	Thioredoxin domain-containing protein OS=Trypanosoma cruzi Dm28c OX=1416333 GN=TCDM_03680 PE=4 SV=1
tr|V5DHD7|V5DHD7_TRYCR	2	0.008	0.59	0.31	3670000000	CCAAT-binding factor domain-containing protein OS=Trypanosoma cruzi Dm28c OX=1416333 GN=TCDM_04510 PE=3 SV=1
tr|V5BA48|V5BA48_TRYCR	2	0.037	0.62	0.33	10500000000	Fatty acid desaturase OS=Trypanosoma cruzi Dm28c OX=1416333 GN=TCDM_09345 PE=3 SV=1
tr|V5DCD8|V5DCD8_TRYCR	2	0.108	0.59	0.344	26300000000	C3H1-type domain-containing protein OS=Trypanosoma cruzi Dm28c OX=1416333 GN=TCDM_06613 PE=4 SV=1
tr|V5BTR5|V5BTR5_TRYCR	2	0.016	0.55	0.3	582000000	Ribosomal RNA-processing protein 12-like conserved domain-containing protein OS=Trypanosoma cruzi Dm28c OX=1416333 GN=TCDM_01554 PE=4 SV=1
tr|V5BUF5|V5BUF5_TRYCR	2	0.067	0.54	0.313	16900000000	Aldo/keto reductase OS=Trypanosoma cruzi Dm28c OX=1416333 GN=TCDM_01277 PE=4 SV=1
tr|V5B8C2|V5B8C2_TRYCR	2	0.236	0.71	0.426	62200000000	ATP-dependent DNA helicase OS=Trypanosoma cruzi Dm28c OX=1416333 GN=TCDM_01796 PE=3 SV=1
tr|V5BPK3|V5BPK3_TRYCR	2	0.268	0.72	0.44	7320000000	Ubiquitin-like domain-containing protein OS=Trypanosoma cruzi Dm28c OX=1416333 GN=TCDM_03230 PE=4 SV=1
tr|V5BFW4|V5BFW4_TRYCR	2	0.147	0.58	0.353	3580000000	Uncharacterized protein OS=Trypanosoma cruzi Dm28c OX=1416333 GN=TCDM_04709 PE=4 SV=1
tr|V5DE49|V5DE49_TRYCR	2	0.025	0.6	0.319	794000	Small ribosomal subunit protein mS29 OS=Trypanosoma cruzi Dm28c OX=1416333 GN=TCDM_05876 PE=3 SV=1
tr|V5BDP5|V5BDP5_TRYCR	2	0.164	0.53	0.342	4050000000	Uncharacterized protein OS=Trypanosoma cruzi Dm28c OX=1416333 GN=TCDM_07861 PE=4 SV=1
tr|V5DLM1|V5DLM1_TRYCR	2	0.374	0.63	0.446	121000000000	Spindle pole body component OS=Trypanosoma cruzi Dm28c OX=1416333 GN=TCDM_02900 PE=3 SV=1
tr|V5B6T4|V5B6T4_TRYCR	3	0.113	0.76	0.458	4110000000	Translation-associated element 2 OS=Trypanosoma cruzi Dm28c OX=1416333 GN=TCDM_10684 PE=3 SV=1
tr|V5B9C8|V5B9C8_TRYCR	3	0.627	0.79	0.639	530000000000	Uncharacterized protein OS=Trypanosoma cruzi Dm28c OX=1416333 GN=TCDM_01302 PE=4 SV=1
tr|V5AWB7|V5AWB7_TRYCR	1	0.959	0	0.375	0.000188374	Flap endonuclease 1 OS=Trypanosoma cruzi Dm28c OX=1416333 GN=TCDM_06623 PE=3 SV=1
tr|V5BAM3|V5BAM3_TRYCR	3	0.094	0.72	0.438	34400000000	Uncharacterized protein OS=Trypanosoma cruzi Dm28c OX=1416333 GN=TCDM_07078 PE=3 SV=1
tr|V5BKX8|V5BKX8_TRYCR	3	0.089	0.58	0.39	32700000000	Uncharacterized protein OS=Trypanosoma cruzi Dm28c OX=1416333 GN=TCDM_06570 PE=4 SV=1
tr|V5DFP8|V5DFP8_TRYCR	1	0.837	0	0.335	530000000000	Uncharacterized protein OS=Trypanosoma cruzi Dm28c OX=1416333 GN=TCDM_05146 PE=4 SV=1
tr|V5B9P8|V5B9P8_TRYCR	1	0.522	0	0.23	113000000000	glyceraldehyde-3-phosphate dehydrogenase (phosphorylating) OS=Trypanosoma cruzi Dm28c OX=1416333 GN=TCDM_07515 PE=3 SV=1
tr|V5B3J6|V5B3J6_TRYCR	2	0.247	0.62	0.4	6570000000	Hook complex protein, conserved OS=Trypanosoma cruzi Dm28c OX=1416333 GN=TCDM_03461 PE=4 SV=1
tr|V5BSF6|V5BSF6_TRYCR	2	0.851	0.51	0.565	0.000117115	Cilia-and flagella-associated protein 96 OS=Trypanosoma cruzi Dm28c OX=1416333 GN=TCDM_03750 PE=3 SV=1
tr|V5AZ17|V5AZ17_TRYCR	2	0.168	0.68	0.394	4150000000	Uncharacterized protein OS=Trypanosoma cruzi Dm28c OX=1416333 GN=TCDM_05328 PE=4 SV=1
tr|V5BFU8|V5BFU8_TRYCR	2	0.148	0.55	0.344	36000000000	Large ribosomal subunit protein uL15/eL18 domain-containing protein OS=Trypanosoma cruzi Dm28c OX=1416333 GN=TCDM_08876 PE=3 SV=1
tr|V5B5Q7|V5B5Q7_TRYCR	2	0.053	0.61	0.332	13900000000	MYND-type domain-containing protein OS=Trypanosoma cruzi Dm28c OX=1416333 GN=TCDM_02698 PE=4 SV=1
tr|V5DM89|V5DM89_TRYCR	2	0.122	0.58	0.345	29600000000	Flagellar Member 7 OS=Trypanosoma cruzi Dm28c OX=1416333 GN=TCDM_02660 PE=4 SV=1
tr|V5BEN2|V5BEN2_TRYCR	2	0.201	0.69	0.408	5080000000	PQ-loop repeat-containing protein 1 OS=Trypanosoma cruzi Dm28c OX=1416333 GN=TCDM_07414 PE=4 SV=1
tr|V5BKG1|V5BKG1_TRYCR	2	0.025	0.55	0.303	783000000	TPR-repeat protein OS=Trypanosoma cruzi Dm28c OX=1416333 GN=TCDM_04700 PE=4 SV=1
tr|V5D807|V5D807_TRYCR	2	0.941	0.73	0.668	0.000278879	Aminotransferase class V domain-containing protein OS=Trypanosoma cruzi Dm28c OX=1416333 GN=TCDM_08607 PE=4 SV=1
tr|V5BCJ6|V5BCJ6_TRYCR	2	0.043	0.7	0.359	11800000000	Roadblock/LAMTOR2 domain-containing protein OS=Trypanosoma cruzi Dm28c OX=1416333 GN=TCDM_00012 PE=4 SV=1
tr|V5BCH4|V5BCH4_TRYCR	2	0.068	0.6	0.334	17200000000	Ras-related protein Rab-21 OS=Trypanosoma cruzi Dm28c OX=1416333 GN=TCDM_14323 PE=4 SV=1
tr|V5BQZ1|V5BQZ1_TRYCR	2	0.082	0.68	0.365	2020000000	WW domain-containing protein OS=Trypanosoma cruzi Dm28c OX=1416333 GN=TCDM_04339 PE=4 SV=1
tr|V5BAD2|V5BAD2_TRYCR	2	0.059	0.61	0.334	15300000000	C3H1-type domain-containing protein OS=Trypanosoma cruzi Dm28c OX=1416333 GN=TCDM_07279 PE=3 SV=1
tr|V5BQ11|V5BQ11_TRYCR	2	0.037	0.67	0.347	10400000000	NADH-ubiquinone oxidoreductase complex I subunit OS=Trypanosoma cruzi Dm28c OX=1416333 GN=TCDM_03027 PE=4 SV=1
tr|V5BRS4|V5BRS4_TRYCR	2	0.142	0.63	0.368	34400000000	Actin-related protein 2/3 complex subunit OS=Trypanosoma cruzi Dm28c OX=1416333 GN=TCDM_02401 PE=3 SV=1
tr|V5B627|V5B627_TRYCR	2	0.111	0.59	0.345	26900000000	Uncharacterized protein OS=Trypanosoma cruzi Dm28c OX=1416333 GN=TCDM_14421 PE=4 SV=1
tr|V5DGN4|V5DGN4_TRYCR	2	0.075	0.62	0.343	1880000000	Uncharacterized protein OS=Trypanosoma cruzi Dm28c OX=1416333 GN=TCDM_04795 PE=4 SV=1
tr|V5BJR9|V5BJR9_TRYCR	2	0.049	0.54	0.307	13100000000	Bardet-Biedl syndrome 5 protein OS=Trypanosoma cruzi Dm28c OX=1416333 GN=TCDM_05013 PE=3 SV=1
tr|V5BVE3|V5BVE3_TRYCR	2	0.031	0.64	0.335	910000000	Trans-sialidase OS=Trypanosoma cruzi Dm28c OX=1416333 GN=TCDM_00949 PE=4 SV=1
tr|V5DIL5|V5DIL5_TRYCR	2	0.198	0.6	0.377	5000000000	Uncharacterized protein OS=Trypanosoma cruzi Dm28c OX=1416333 GN=TCDM_04036 PE=3 SV=1
tr|V5B6Z0|V5B6Z0_TRYCR	2	0.091	0.51	0.311	22200000000	Uncharacterized protein OS=Trypanosoma cruzi Dm28c OX=1416333 GN=TCDM_02292 PE=4 SV=1
tr|V5DRU1|V5DRU1_TRYCR	2	0.505	0.72	0.519	210000000000	TFIIS central domain-containing protein OS=Trypanosoma cruzi Dm28c OX=1416333 GN=TCDM_14190 PE=4 SV=1
tr|V5BFC1|V5BFC1_TRYCR	2	0.018	0.63	0.327	613000000	Protein phosphatase 2A regulatory subunit OS=Trypanosoma cruzi Dm28c OX=1416333 GN=TCDM_04952 PE=4 SV=1
tr|V5B9H5|V5B9H5_TRYCR	2	0.218	0.66	0.404	56200000000	C2 NT-type domain-containing protein OS=Trypanosoma cruzi Dm28c OX=1416333 GN=TCDM_07681 PE=4 SV=1
tr|V5B6H7|V5B6H7_TRYCR	2	0.089	0.65	0.357	21700000000	FYVE, RhoGEF and PH domain-containing protein 2 OS=Trypanosoma cruzi Dm28c OX=1416333 GN=TCDM_02356 PE=4 SV=1
tr|V5BPP1|V5BPP1_TRYCR	2	0.112	0.62	0.355	2710000000	Uncharacterized protein OS=Trypanosoma cruzi Dm28c OX=1416333 GN=TCDM_03069 PE=4 SV=1
tr|V5B4K7|V5B4K7_TRYCR	2	0.107	0.51	0.317	26000000000	Inositol-1-monophosphatase OS=Trypanosoma cruzi Dm28c OX=1416333 GN=TCDM_03084 PE=3 SV=1
tr|V5BP32|V5BP32_TRYCR	2	0.122	0.65	0.368	2950000000	Uncharacterized protein OS=Trypanosoma cruzi Dm28c OX=1416333 GN=TCDM_14457 PE=4 SV=1
tr|V5BIV2|V5BIV2_TRYCR	2	0.24	0.59	0.388	6360000000	EF-hand domain-containing protein OS=Trypanosoma cruzi Dm28c OX=1416333 GN=TCDM_07492 PE=4 SV=1
tr|V5BM39|V5BM39_TRYCR	2	0.338	0.56	0.41	102000000000	Ras-family member OS=Trypanosoma cruzi Dm28c OX=1416333 GN=TCDM_13992 PE=3 SV=1
tr|V5BV66|V5BV66_TRYCR	2	0.152	0.63	0.372	3700000000	Uncharacterized protein OS=Trypanosoma cruzi Dm28c OX=1416333 GN=TCDM_01210 PE=4 SV=1
tr|V5BEJ5|V5BEJ5_TRYCR	2	0.728	0.68	0.58	566000000000	ATP-grasp domain-containing protein OS=Trypanosoma cruzi Dm28c OX=1416333 GN=TCDM_07457 PE=4 SV=1
tr|V5BY30|V5BY30_TRYCR	2	0.304	0.54	0.392	875000000	PIH1D1/2/3 CS-like domain-containing protein OS=Trypanosoma cruzi Dm28c OX=1416333 GN=TCDM_01704 PE=4 SV=1
tr|V5BUZ5|V5BUZ5_TRYCR	2	0.255	0.6	0.396	6850000000	p450 reductase OS=Trypanosoma cruzi Dm28c OX=1416333 GN=TCDM_02758 PE=4 SV=1
tr|V5BJG4|V5BJG4_TRYCR	2	0.113	0.58	0.342	27300000000	Uncharacterized protein OS=Trypanosoma cruzi Dm28c OX=1416333 GN=TCDM_07290 PE=4 SV=1
tr|V5BPS9|V5BPS9_TRYCR	2	0.033	0.56	0.309	961000000	Phosphatidylinositol-4-phosphate 5-kinase OS=Trypanosoma cruzi Dm28c OX=1416333 GN=TCDM_04772 PE=4 SV=1
tr|V5BUH7|V5BUH7_TRYCR	2	0.708	0.55	0.53	514000000000	Uncharacterized protein OS=Trypanosoma cruzi Dm28c OX=1416333 GN=TCDM_02951 PE=4 SV=1
tr|V5ARA5|V5ARA5_TRYCR	2	0.023	0.57	0.309	746000000	Pre-mRNA-splicing factor SYF1 OS=Trypanosoma cruzi Dm28c OX=1416333 GN=TCDM_08920 PE=3 SV=1
tr|V5BTD6|V5BTD6_TRYCR	2	0.371	0.66	0.455	119000000000	Pep3/Vps18/deep orange beta-propeller domain-containing protein OS=Trypanosoma cruzi Dm28c OX=1416333 GN=TCDM_01726 PE=4 SV=1
tr|V5DF64|V5DF64_TRYCR	2	0.406	0.53	0.423	138000000000	Uncharacterized protein OS=Trypanosoma cruzi Dm28c OX=1416333 GN=TCDM_05381 PE=4 SV=1
tr|V5BE24|V5BE24_TRYCR	2	0.065	0.57	0.323	16400000000	FtsJ cell division protein OS=Trypanosoma cruzi Dm28c OX=1416333 GN=TCDM_05479 PE=4 SV=1
tr|V5BSQ3|V5BSQ3_TRYCR	2	0.276	0.52	0.376	7640000000	6-phosphofructo-2-kinase/fructose-2 OS=Trypanosoma cruzi Dm28c OX=1416333 GN=TCDM_00348 PE=4 SV=1
tr|V5BLH1|V5BLH1_TRYCR	2	0.657	0.53	0.507	40400000000	Kinesin-like protein OS=Trypanosoma cruzi Dm28c OX=1416333 GN=TCDM_06295 PE=3 SV=1
tr|V5BJJ9|V5BJJ9_TRYCR	2	0.23	0.72	0.428	6020000000	Uncharacterized protein OS=Trypanosoma cruzi Dm28c OX=1416333 GN=TCDM_07248 PE=4 SV=1
tr|V5BGX7|V5BGX7_TRYCR	2	0.067	0.65	0.35	16900000000	Uncharacterized protein OS=Trypanosoma cruzi Dm28c OX=1416333 GN=TCDM_06261 PE=4 SV=1
tr|V5D579|V5D579_TRYCR	2	0.275	0.51	0.373	76100000000	non-specific serine/threonine protein kinase OS=Trypanosoma cruzi Dm28c OX=1416333 GN=TCDM_09739 PE=3 SV=1
tr|V5AYJ7|V5AYJ7_TRYCR	1	0.405	0	0.191	68900000000	Uncharacterized protein OS=Trypanosoma cruzi Dm28c OX=1416333 GN=TCDM_05547 PE=4 SV=1
tr|V5D4R1|V5D4R1_TRYCR	1	0.362	0	0.176	5710000000	Choline/carnitine O-acyltransferase OS=Trypanosoma cruzi Dm28c OX=1416333 GN=TCDM_09869 PE=3 SV=1
tr|V5BAR0|V5BAR0_TRYCR	1	0.399	0	0.189	6710000000	Lebercilin domain-containing protein OS=Trypanosoma cruzi Dm28c OX=1416333 GN=TCDM_10925 PE=4 SV=1
tr|V5BR61|V5BR61_TRYCR	1	0.2	0	0.122	2530000000	Large ribosomal subunit protein uL22c OS=Trypanosoma cruzi Dm28c OX=1416333 GN=TCDM_02572 PE=3 SV=1
tr|V5BUI1|V5BUI1_TRYCR	1	0.207	0	0.125	2640000000	Uncharacterized protein OS=Trypanosoma cruzi Dm28c OX=1416333 GN=TCDM_02956 PE=4 SV=1
tr|V5BED1|V5BED1_TRYCR	1	0.238	0	0.135	31400000000	Peroxisome assembly protein OS=Trypanosoma cruzi Dm28c OX=1416333 GN=TCDM_05315 PE=3 SV=1
tr|V5BVK2|V5BVK2_TRYCR	1	0.677	0	0.281	221000000000	Metal-binding domain-containing protein OS=Trypanosoma cruzi Dm28c OX=1416333 GN=TCDM_01061 PE=4 SV=1
tr|V5BYX2|V5BYX2_TRYCR	1	0.538	0	0.235	121000000000	Uncharacterized protein OS=Trypanosoma cruzi Dm28c OX=1416333 GN=TCDM_01436 PE=4 SV=1

## Sheet: decreasedRe-compound
Relative abundance decreased in parasites treated with fac-[Re(CO)3(tmp)(CTZ)](PF6)
Locus	Peptide Count	Coverage %	Log2(FoldChange)	p-value	Description	Acc nro Uniprot Tc Dm28c
tr|V5BDK8|V5BDK8_TRYCR	10	0.352	2.576	0.00168579	Methylthioribose-1-phosphate isomerase OS=Trypanosoma cruzi Dm28c OX=1416333 GN=TCDM_09816 PE=3 SV=1	V5BDK8
tr|V5BD69|V5BD69_TRYCR	20	0.446	2.407	0.0198908	Threonine synthase OS=Trypanosoma cruzi Dm28c OX=1416333 GN=TCDM_05925 PE=3 SV=1	V5BD69
tr|V5C333|V5C333_TRYCR	5	0.229	2.388	0.0302887	60S ribosomal subunit protein L31 OS=Trypanosoma cruzi Dm28c OX=1416333 GN=TCDM_14322 PE=1 SV=1	V5C333
tr|V5B3K7|V5B3K7_TRYCR	13	0.316	2.386	0.00637345	Flagellum targeting protein kharon1 OS=Trypanosoma cruzi Dm28c OX=1416333 GN=TCDM_03483 PE=4 SV=1	V5B3K7
tr|V5BH01|V5BH01_TRYCR	12	0.217	2.383	0.0444939	C2 NT-type domain-containing protein OS=Trypanosoma cruzi Dm28c OX=1416333 GN=TCDM_08356 PE=4 SV=1	V5BH01
tr|V5AW05|V5AW05_TRYCR	20	0.406	2.35	0.00408285	tyrosine--tRNA ligase OS=Trypanosoma cruzi Dm28c OX=1416333 GN=TCDM_06724 PE=4 SV=1	V5AW05
tr|V5BIP9|V5BIP9_TRYCR	4	0.245	2.107	0.00328208	Large ribosomal subunit protein eL34 OS=Trypanosoma cruzi Dm28c OX=1416333 GN=TCDM_07608 PE=3 SV=1	V5BIP9
tr|V5BWH4|V5BWH4_TRYCR	4	0.279	2.077	0.00751339	40S ribosomal protein S27 OS=Trypanosoma cruzi Dm28c OX=1416333 GN=TCDM_14332 PE=3 SV=1	V5BWH4
tr|V5DAL2|V5DAL2_TRYCR	4	0.268	2.012	0.0328276	Ribosomal protein L38 OS=Trypanosoma cruzi Dm28c OX=1416333 GN=TCDM_07391 PE=3 SV=1	V5DAL2
tr|V5BVR2|V5BVR2_TRYCR	23	0.729	1.984	28700000	Pyrroline-5-carboxylate reductase OS=Trypanosoma cruzi Dm28c OX=1416333 GN=TCDM_02525 PE=3 SV=1	V5BVR2
tr|V5BI34|V5BI34_TRYCR	12	0.599	1.97	0.000496164	Tyrosyl or methionyl-tRNA synthetase OS=Trypanosoma cruzi Dm28c OX=1416333 GN=TCDM_03834 PE=4 SV=1	V5BI34
tr|V5AWD8|V5AWD8_TRYCR	10	0.514	1.968	0.00216587	Phosphomannomutase OS=Trypanosoma cruzi Dm28c OX=1416333 GN=TCDM_06540 PE=3 SV=1	V5AWD8
tr|V5BB20|V5BB20_TRYCR	4	0.213	1.963	0.0119214	Cell cycle sequence binding phosphoprotein (RBP45) OS=Trypanosoma cruzi Dm28c OX=1416333 GN=TCDM_00590 PE=4 SV=1	V5BB20
tr|V5D050|V5D050_TRYCR	15	0.646	1.95	440000000000	6-phosphogluconolactonase OS=Trypanosoma cruzi Dm28c OX=1416333 GN=TCDM_11574 PE=3 SV=1	V5D050
tr|V5DAK6|V5DAK6_TRYCR	11	0.366	1.946	0.0261385	Kynureninase OS=Trypanosoma cruzi Dm28c OX=1416333 GN=KYNU PE=3 SV=1	V5DAK6
tr|V5BMN4|V5BMN4_TRYCR	16	0.441	1.916	0.000507355	Uncharacterized protein OS=Trypanosoma cruzi Dm28c OX=1416333 GN=TCDM_03880 PE=4 SV=1	V5BMN4
tr|V5DTM6|V5DTM6_TRYCR	10	0.39	1.909	0.000430578	Methionine aminopeptidase OS=Trypanosoma cruzi Dm28c OX=1416333 GN=TCDM_00560 PE=3 SV=1	V5DTM6
tr|V5BGR0|V5BGR0_TRYCR	8	0.62	1.891	0.0031744	Vacuolar ATP synthase subunit B OS=Trypanosoma cruzi Dm28c OX=1416333 GN=TCDM_06394 PE=3 SV=1	V5BGR0
tr|V5BNE3|V5BNE3_TRYCR	19	0.515	1.888	277000000000	Glutathione synthetase OS=Trypanosoma cruzi Dm28c OX=1416333 GN=TCDM_05422 PE=3 SV=1	V5BNE3
tr|V5BPP5|V5BPP5_TRYCR	6	0.144	1.843	0.00914617	Uncharacterized protein OS=Trypanosoma cruzi Dm28c OX=1416333 GN=TCDM_03074 PE=3 SV=1	V5BPP5
tr|V5B6W3|V5B6W3_TRYCR	5	0.265	1.839	0.0358149	Uncharacterized protein OS=Trypanosoma cruzi Dm28c OX=1416333 GN=TCDM_02257 PE=4 SV=1	V5B6W3
tr|V5B892|V5B892_TRYCR	20	0.487	1.821	0.00596683	Phosphoacetylglucosamine mutase OS=Trypanosoma cruzi Dm28c OX=1416333 GN=TCDM_01746 PE=3 SV=1	V5B892
tr|V5DUX3|V5DUX3_TRYCR	4	0.262	1.809	0.00668946	lactoylglutathione lyase OS=Trypanosoma cruzi Dm28c OX=1416333 GN=TCDM_14289 PE=3 SV=1	V5DUX3
tr|V5DEL8|V5DEL8_TRYCR	2	0.057	1.807	0.0434991	Uncharacterized protein OS=Trypanosoma cruzi Dm28c OX=1416333 GN=TCDM_05596 PE=4 SV=1	V5DEL8
tr|V5BN93|V5BN93_TRYCR	15	0.89	1.805	262000000000	Ubiquitin carboxyl-terminal hydrolase OS=Trypanosoma cruzi Dm28c OX=1416333 GN=TCDM_02042 PE=3 SV=1	V5BN93
tr|V5BJZ6|V5BJZ6_TRYCR	8	0.453	1.802	0.0281235	Poly-zinc finger protein 2 OS=Trypanosoma cruzi Dm28c OX=1416333 GN=TCDM_14244 PE=4 SV=1	V5BJZ6
tr|V5BIM6|V5BIM6_TRYCR	16	0.317	1.801	0.00846733	Mitochondrial processing peptidase alpha subunit OS=Trypanosoma cruzi Dm28c OX=1416333 GN=TCDM_05444 PE=3 SV=1	V5BIM6
tr|V5B8C6|V5B8C6_TRYCR	21	0.614	1.795	10300000	Obg-like ATPase 1 OS=Trypanosoma cruzi Dm28c OX=1416333 GN=TCDM_10080 PE=3 SV=1	V5B8C6
tr|V5B760|V5B760_TRYCR	6	0.351	1.792	0.00243722	Uncharacterized protein OS=Trypanosoma cruzi Dm28c OX=1416333 GN=TCDM_02073 PE=4 SV=1	V5B760
tr|V5D681|V5D681_TRYCR	17	0.182	1.786	0.049163	5'-3' exonuclease XRNA OS=Trypanosoma cruzi Dm28c OX=1416333 GN=TCDM_09289 PE=3 SV=1	V5D681
tr|V5BHG4|V5BHG4_TRYCR	10	0.434	1.776	85400000000	40S ribosomal protein S11 OS=Trypanosoma cruzi Dm28c OX=1416333 GN=TCDM_13980 PE=3 SV=1	V5BHG4
tr|V5DJP1|V5DJP1_TRYCR	10	0.687	1.771	4910000000	Putative ATP-dependent DEAD/H RNA helicase OS=Trypanosoma cruzi Dm28c OX=1416333 GN=TCDM_03689 PE=4 SV=1	V5DJP1
tr|V5DLD7|V5DLD7_TRYCR	4	0.182	1.77	0.0114779	Histone H1 OS=Trypanosoma cruzi Dm28c OX=1416333 GN=TCDM_02978 PE=4 SV=1	V5DLD7
tr|V5AVR5|V5AVR5_TRYCR	9	0.395	1.764	0.000471723	SEP domain-containing protein OS=Trypanosoma cruzi Dm28c OX=1416333 GN=TCDM_06823 PE=4 SV=1	V5AVR5
tr|V5B8X2|V5B8X2_TRYCR	20	0.548	1.748	104000000000	40S ribosomal protein S6 OS=Trypanosoma cruzi Dm28c OX=1416333 GN=TCDM_07959 PE=3 SV=1	V5B8X2
tr|V5BE01|V5BE01_TRYCR	22	0.582	1.746	350000000	Adenylosuccinate lyase OS=Trypanosoma cruzi Dm28c OX=1416333 GN=TCDM_07701 PE=3 SV=1	V5BE01
tr|V5B773|V5B773_TRYCR	18	0.557	1.731	69400000000	UV excision repair protein RAD23 OS=Trypanosoma cruzi Dm28c OX=1416333 GN=TCDM_02094 PE=3 SV=1	V5B773
tr|V5BAG7|V5BAG7_TRYCR	37	0.723	1.724	633000	Phosphoglycerate kinase OS=Trypanosoma cruzi Dm28c OX=1416333 GN=TCDM_14526 PE=3 SV=1	V5BAG7
tr|V5BDV9|V5BDV9_TRYCR	19	0.22	1.719	887000000	Peptidase OS=Trypanosoma cruzi Dm28c OX=1416333 GN=TCDM_09728 PE=3 SV=1	V5BDV9
tr|V5B558|V5B558_TRYCR	7	0.272	1.719	0.015981	Branchpoint-bridging protein OS=Trypanosoma cruzi Dm28c OX=1416333 GN=TCDM_02938 PE=3 SV=1	V5B558
tr|V5B7Z0|V5B7Z0_TRYCR	12	0.451	1.718	1740000000	Aldose 1-epimerase OS=Trypanosoma cruzi Dm28c OX=1416333 GN=TCDM_08335 PE=3 SV=1	V5B7Z0
tr|V5BWE3|V5BWE3_TRYCR	30	0.74	1.711	51600	Aminopeptidase OS=Trypanosoma cruzi Dm28c OX=1416333 GN=TCDM_00653 PE=1 SV=1	V5BWE3
tr|V5BM55|V5BM55_TRYCR	28	0.733	1.697	0	phosphoglycerate mutase (2,3-diphosphoglycerate-independent) OS=Trypanosoma cruzi Dm28c OX=1416333 GN=TCDM_05955 PE=3 SV=1	V5BM55
tr|V5BMF2|V5BMF2_TRYCR	5	0.182	1.697	0.0465021	3-oxo-5-alpha-steroid 4-dehydrogenase OS=Trypanosoma cruzi Dm28c OX=1416333 GN=TCDM_03956 PE=3 SV=1	V5BMF2
tr|V5DNJ4|V5DNJ4_TRYCR	8	0.412	1.695	8240000000	Biotin/lipoate protein ligase OS=Trypanosoma cruzi Dm28c OX=1416333 GN=TCDM_02279 PE=3 SV=1	V5DNJ4
tr|V5DQC0|V5DQC0_TRYCR	13	0.379	1.691	0.000218086	UDP-galactose 4-epimerase OS=Trypanosoma cruzi Dm28c OX=1416333 GN=TCDM_01584 PE=4 SV=1	V5DQC0
tr|V5BD50|V5BD50_TRYCR	19	0.532	1.688	0.00844915	Uncharacterized protein OS=Trypanosoma cruzi Dm28c OX=1416333 GN=TCDM_08028 PE=4 SV=1	V5BD50
tr|V5DA48|V5DA48_TRYCR	9	0.895	1.679	0.00119944	Stress-response A/B barrel domain-containing protein OS=Trypanosoma cruzi Dm28c OX=1416333 GN=TCDM_14371 PE=4 SV=1	V5DA48
tr|V5BL26|V5BL26_TRYCR	26	0.699	1.652	5920000000	60S acidic ribosomal protein P0 OS=Trypanosoma cruzi Dm28c OX=1416333 GN=TCDM_04519 PE=3 SV=1	V5BL26
tr|V5DPL1|V5DPL1_TRYCR	21	0.512	1.651	1660000000	Bifunctional dihydrofolate reductase-thymidylate synthase OS=Trypanosoma cruzi Dm28c OX=1416333 GN=TCDM_01885 PE=3 SV=1	V5DPL1
tr|V5BWY7|V5BWY7_TRYCR	14	0.645	1.651	32200000	cysteine synthase OS=Trypanosoma cruzi Dm28c OX=1416333 GN=TCDM_02303 PE=4 SV=1	V5BWY7
tr|V5BAS3|V5BAS3_TRYCR	5	0.282	1.649	0.0254678	Uncharacterized protein OS=Trypanosoma cruzi Dm28c OX=1416333 GN=TCDM_00847 PE=4 SV=1	V5BAS3
tr|V5BDX2|V5BDX2_TRYCR	3	0.082	1.649	0.039255	Dihydrolipoamide dehydrogenase OS=Trypanosoma cruzi Dm28c OX=1416333 GN=TCDM_07797 PE=3 SV=1	V5BDX2
tr|V5BV73|V5BV73_TRYCR	14	0.487	1.644	0.000311487	RRM domain-containing protein OS=Trypanosoma cruzi Dm28c OX=1416333 GN=TCDM_14000 PE=4 SV=1	V5BV73
tr|V5AK68|V5AK68_TRYCR	19	0.244	1.642	66300000000	Kinesin OS=Trypanosoma cruzi Dm28c OX=1416333 GN=TCDM_12876 PE=4 SV=1	V5AK68
tr|V5B718|V5B718_TRYCR	5	0.151	1.639	0.00743984	BRCT domain-containing protein OS=Trypanosoma cruzi Dm28c OX=1416333 GN=TCDM_08770 PE=4 SV=1	V5B718
tr|V5BM62|V5BM62_TRYCR	26	0.522	1.635	68700	Prolyl endopeptidase OS=Trypanosoma cruzi Dm28c OX=1416333 GN=TCDM_05965 PE=3 SV=1	V5BM62
tr|V5B774|V5B774_TRYCR	63	0.714	1.63	0.222	leucine--tRNA ligase OS=Trypanosoma cruzi Dm28c OX=1416333 GN=TCDM_08673 PE=3 SV=1	V5B774
tr|V5BE31|V5BE31_TRYCR	17	0.347	1.628	0.000840251	Uncharacterized protein OS=Trypanosoma cruzi Dm28c OX=1416333 GN=TCDM_07670 PE=4 SV=1	V5BE31
tr|V5BSE6|V5BSE6_TRYCR	26	0.535	1.624	1190000000	glutamate--tRNA ligase OS=Trypanosoma cruzi Dm28c OX=1416333 GN=TCDM_02101 PE=3 SV=1	V5BSE6
tr|V5BHY0|V5BHY0_TRYCR	20	0.653	1.622	98500000000	60S ribosomal protein L5 OS=Trypanosoma cruzi Dm28c OX=1416333 GN=TCDM_07951 PE=3 SV=1	V5BHY0
tr|V5BKV0|V5BKV0_TRYCR	7	0.245	1.613	0.00028996	RRM domain-containing protein OS=Trypanosoma cruzi Dm28c OX=1416333 GN=TCDM_06646 PE=4 SV=1	V5BKV0
tr|V5BMZ6|V5BMZ6_TRYCR	21	0.542	1.611	27200000000	phosphoglucomutase (alpha-D-glucose-1,6-bisphosphate-dependent) OS=Trypanosoma cruzi Dm28c OX=1416333 GN=TCDM_14025 PE=3 SV=1	V5BMZ6
tr|V5BH60|V5BH60_TRYCR	36	0.575	1.603	17100	60S ribosomal protein L4 OS=Trypanosoma cruzi Dm28c OX=1416333 GN=TCDM_04279 PE=3 SV=1	V5BH60
tr|V5BPY6|V5BPY6_TRYCR	15	0.711	1.595	3700000000	G-actin binding protein OS=Trypanosoma cruzi Dm28c OX=1416333 GN=TCDM_04715 PE=3 SV=1	V5BPY6
tr|V5DHA5|V5DHA5_TRYCR	29	0.603	1.593	64300	phenylalanine--tRNA ligase OS=Trypanosoma cruzi Dm28c OX=1416333 GN=TCDM_04472 PE=3 SV=1	V5DHA5
tr|V5DCR6|V5DCR6_TRYCR	15	0.505	1.587	0.00029023	Protein phosphatase 2C OS=Trypanosoma cruzi Dm28c OX=1416333 GN=TCDM_06461 PE=4 SV=1	V5DCR6
tr|V5BNY3|V5BNY3_TRYCR	13	0.486	1.586	298000000000	RNA-binding protein OS=Trypanosoma cruzi Dm28c OX=1416333 GN=TCDM_03380 PE=4 SV=1	V5BNY3
tr|V5B836|V5B836_TRYCR	29	0.614	1.584	7910000000	inositol-3-phosphate synthase OS=Trypanosoma cruzi Dm28c OX=1416333 GN=TCDM_08270 PE=3 SV=1	V5B836
tr|V5B9E8|V5B9E8_TRYCR	12	0.349	1.584	930000000	Acyl-ACP thioesterase-like C-terminal domain-containing protein OS=Trypanosoma cruzi Dm28c OX=1416333 GN=TCDM_01334 PE=4 SV=1	V5B9E8
tr|V5BWW6|V5BWW6_TRYCR	16	0.517	1.581	0.00426246	Malate dehydrogenase (Quinone) OS=Trypanosoma cruzi Dm28c OX=1416333 GN=TCDM_02296 PE=4 SV=1	V5BWW6
tr|V5BDN6|V5BDN6_TRYCR	17	0.713	1.579	1400000000	Nascent polypeptide associated complex subunit OS=Trypanosoma cruzi Dm28c OX=1416333 GN=TCDM_05688 PE=3 SV=1	V5BDN6
tr|V5DUW4|V5DUW4_TRYCR	6	0.376	1.574	0.000249738	riboflavin kinase OS=Trypanosoma cruzi Dm28c OX=1416333 GN=TCDM_13972 PE=4 SV=1	V5DUW4
tr|V5C1U3|V5C1U3_TRYCR	15	0.769	1.573	249000000	Arginase OS=Trypanosoma cruzi Dm28c OX=1416333 GN=TCDM_00553 PE=3 SV=1	V5C1U3
tr|V5BSD6|V5BSD6_TRYCR	7	0.251	1.573	0.000484313	Uncharacterized protein OS=Trypanosoma cruzi Dm28c OX=1416333 GN=TCDM_02089 PE=4 SV=1	V5BSD6
tr|V5BNH8|V5BNH8_TRYCR	12	0.519	1.571	0.0065946	Pyroglutamyl-peptidase I (PGP) OS=Trypanosoma cruzi Dm28c OX=1416333 GN=TCDM_03616 PE=3 SV=1	V5BNH8
tr|V5B7R2|V5B7R2_TRYCR	24	0.62	1.57	517	Nitrate reductase OS=Trypanosoma cruzi Dm28c OX=1416333 GN=TCDM_08466 PE=3 SV=1	V5B7R2
tr|V5BRV7|V5BRV7_TRYCR	6	0.409	1.569	0.0197231	40S ribosomal protein S25 OS=Trypanosoma cruzi Dm28c OX=1416333 GN=TCDM_14375 PE=3 SV=1	V5BRV7
tr|V5AR37|V5AR37_TRYCR	4	0.333	1.569	0.00226275	Pre-mRNA-processing factor 19 OS=Trypanosoma cruzi Dm28c OX=1416333 GN=TCDM_08984 PE=3 SV=1	V5AR37
tr|V5BXH3|V5BXH3_TRYCR	7	0.152	1.564	0.0172483	ENTH domain-containing protein OS=Trypanosoma cruzi Dm28c OX=1416333 GN=TCDM_01993 PE=4 SV=1	V5BXH3
tr|V5DTE0|V5DTE0_TRYCR	16	0.445	1.562	188000000000	Glycylpeptide N-tetradecanoyltransferase OS=Trypanosoma cruzi Dm28c OX=1416333 GN=TCDM_00427 PE=3 SV=1	V5DTE0
tr|V5B959|V5B959_TRYCR	9	0.578	1.56	675000000	Protein tyrosine phosphatase OS=Trypanosoma cruzi Dm28c OX=1416333 GN=TCDM_14028 PE=4 SV=1	V5B959
tr|V5AP12|V5AP12_TRYCR	17	0.504	1.559	2010000000	peptidylprolyl isomerase OS=Trypanosoma cruzi Dm28c OX=1416333 GN=TCDM_09867 PE=4 SV=1	V5AP12
tr|V5AYP7|V5AYP7_TRYCR	39	0.696	1.554	541	Trypanothione synthetase OS=Trypanosoma cruzi Dm28c OX=1416333 GN=TCDM_05464 PE=3 SV=1	V5AYP7
tr|V5DEC0|V5DEC0_TRYCR	16	0.461	1.554	17400000	protein-synthesizing GTPase OS=Trypanosoma cruzi Dm28c OX=1416333 GN=TCDM_05764 PE=4 SV=1	V5DEC0
tr|V5DQE3|V5DQE3_TRYCR	20	0.599	1.547	2540000000	ribose-phosphate diphosphokinase OS=Trypanosoma cruzi Dm28c OX=1416333 GN=TCDM_01624 PE=3 SV=1	V5DQE3
tr|V5BS50|V5BS50_TRYCR	15	0.289	1.529	0.021123	Nuclear segregation protein OS=Trypanosoma cruzi Dm28c OX=1416333 GN=TCDM_00418 PE=4 SV=1	V5BS50
tr|V5BA38|V5BA38_TRYCR	5	0.56	1.525	0.012855	peptidylprolyl isomerase OS=Trypanosoma cruzi Dm28c OX=1416333 GN=TCDM_13909 PE=4 SV=1	V5BA38
tr|V5B9X2|V5B9X2_TRYCR	11	0.446	1.524	21000000	Eukaryotic translation initiation factor 6 OS=Trypanosoma cruzi Dm28c OX=1416333 GN=EIF6 PE=3 SV=1	V5B9X2
tr|V5BX72|V5BX72_TRYCR	12	0.472	1.519	0.00562194	60S ribosomal protein L13 OS=Trypanosoma cruzi Dm28c OX=1416333 GN=TCDM_00273 PE=3 SV=1	V5BX72
tr|V5BSM6|V5BSM6_TRYCR	10	0.414	1.518	0.000347486	Inosine-adenosine-guanosine-nucleoside hydrolase OS=Trypanosoma cruzi Dm28c OX=1416333 GN=TCDM_00313 PE=3 SV=1	V5BSM6
tr|V5DIG8|V5DIG8_TRYCR	11	0.336	1.517	0.0183317	Serine/threonine-protein phosphatase OS=Trypanosoma cruzi Dm28c OX=1416333 GN=TCDM_04115 PE=3 SV=1	V5DIG8
tr|V5D2X9|V5D2X9_TRYCR	13	0.413	1.515	0.00010471	p-nitrophenylphosphatase OS=Trypanosoma cruzi Dm28c OX=1416333 GN=TCDM_10531 PE=4 SV=1	V5D2X9
tr|V5DQT9|V5DQT9_TRYCR	19	0.505	1.511	0.000404163	DJ-1/PfpI domain-containing protein OS=Trypanosoma cruzi Dm28c OX=1416333 GN=TCDM_01533 PE=4 SV=1	V5DQT9
tr|V5B849|V5B849_TRYCR	17	0.291	1.508	341000000000	Dipeptidyl-peptidase 8-like serine peptidase OS=Trypanosoma cruzi Dm28c OX=1416333 GN=TCDM_08288 PE=4 SV=1	V5B849
tr|V5BTD2|V5BTD2_TRYCR	3	0.1	1.507	0.00462339	Uncharacterized protein OS=Trypanosoma cruzi Dm28c OX=1416333 GN=TCDM_01716 PE=4 SV=1	V5BTD2
tr|V5DBV2|V5DBV2_TRYCR	24	0.426	1.503	13000000	GMP synthase (glutamine-hydrolyzing) OS=Trypanosoma cruzi Dm28c OX=1416333 GN=TCDM_06857 PE=4 SV=1	V5DBV2
tr|V5A4S1|V5A4S1_TRYCR	5	0.055	1.502	0.0102704	Retrotransposon hot spot (RHS) protein OS=Trypanosoma cruzi Dm28c OX=1416333 GN=TCDM_12749 PE=4 SV=1	V5A4S1
tr|V5BSI2|V5BSI2_TRYCR	36	0.479	1.499	5490	Aminopeptidase OS=Trypanosoma cruzi Dm28c OX=1416333 GN=TCDM_00251 PE=3 SV=1	V5BSI2
tr|V5B887|V5B887_TRYCR	10	0.392	1.497	0.0135554	Retrotransposon hot spot (RHS) protein OS=Trypanosoma cruzi Dm28c OX=1416333 GN=TCDM_08232 PE=4 SV=1	V5B887
tr|V5BJL5|V5BJL5_TRYCR	14	0.728	1.492	258000000000	Coatomer subunit epsilon OS=Trypanosoma cruzi Dm28c OX=1416333 GN=TCDM_05074 PE=3 SV=1	V5BJL5
tr|V5BBY0|V5BBY0_TRYCR	29	0.402	1.491	2100000000	Alanine--tRNA ligase OS=Trypanosoma cruzi Dm28c OX=1416333 GN=TCDM_08637 PE=3 SV=1	V5BBY0
tr|V5DJX0|V5DJX0_TRYCR	20	0.287	1.49	0.00708185	Uncharacterized protein OS=Trypanosoma cruzi Dm28c OX=1416333 GN=TCDM_03603 PE=4 SV=1	V5DJX0
tr|V5BXE6|V5BXE6_TRYCR	7	0.288	1.489	0.0427061	Arginine N-methyltransferase OS=Trypanosoma cruzi Dm28c OX=1416333 GN=TCDM_00370 PE=4 SV=1	V5BXE6
tr|V5ARP0|V5ARP0_TRYCR	24	0.549	1.486	631000000	propanoyl-CoA C-acyltransferase OS=Trypanosoma cruzi Dm28c OX=1416333 GN=TCDM_08701 PE=3 SV=1	V5ARP0
tr|V5B941|V5B941_TRYCR	21	0.688	1.481	22400000000	Adenosine kinase OS=Trypanosoma cruzi Dm28c OX=1416333 GN=TCDM_01513 PE=3 SV=1	V5B941
tr|V5B6M0|V5B6M0_TRYCR	25	0.722	1.479	1220000000	UTP--glucose-1-phosphate uridylyltransferase OS=Trypanosoma cruzi Dm28c OX=1416333 GN=TCDM_02411 PE=3 SV=1	V5B6M0
tr|V5BQU2|V5BQU2_TRYCR	20	0.45	1.479	9590000	CTP synthase OS=Trypanosoma cruzi Dm28c OX=1416333 GN=TCDM_01016 PE=3 SV=1	V5BQU2
tr|V5B7F5|V5B7F5_TRYCR	8	0.507	1.479	0.00206602	Prefoldin subunit OS=Trypanosoma cruzi Dm28c OX=1416333 GN=TCDM_14356 PE=3 SV=1	V5B7F5
tr|V5ALW0|V5ALW0_TRYCR	13	0.496	1.477	105000000000	mannose-1-phosphate guanylyltransferase OS=Trypanosoma cruzi Dm28c OX=1416333 GN=TCDM_10698 PE=3 SV=1	V5ALW0
tr|V5AZ24|V5AZ24_TRYCR	17	0.579	1.476	0.0162798	Uncharacterized protein OS=Trypanosoma cruzi Dm28c OX=1416333 GN=TCDM_05339 PE=4 SV=1	V5AZ24
tr|V5DPU1|V5DPU1_TRYCR	16	0.371	1.47	84400000000	60S ribosomal protein L7a OS=Trypanosoma cruzi Dm28c OX=1416333 GN=TCDM_01690 PE=3 SV=1	V5DPU1
tr|V5ATF0|V5ATF0_TRYCR	10	0.563	1.468	0.00163834	Pru domain-containing protein OS=Trypanosoma cruzi Dm28c OX=1416333 GN=TCDM_07941 PE=4 SV=1	V5ATF0
tr|V5D8V4|V5D8V4_TRYCR	13	0.556	1.465	196000000000	Peptidase M20 dimerisation domain-containing protein OS=Trypanosoma cruzi Dm28c OX=1416333 GN=TCDM_08130 PE=4 SV=1	V5D8V4
tr|V5ASS1|V5ASS1_TRYCR	31	0.583	1.462	20800	Lysine--tRNA ligase OS=Trypanosoma cruzi Dm28c OX=1416333 GN=TCDM_08178 PE=3 SV=1	V5ASS1
tr|V5BC31|V5BC31_TRYCR	13	0.364	1.462	0.000387491	aspartyl aminopeptidase OS=Trypanosoma cruzi Dm28c OX=1416333 GN=TCDM_00265 PE=3 SV=1	V5BC31
tr|V5BBP4|V5BBP4_TRYCR	36	0.64	1.458	351	Adenylosuccinate synthetase OS=Trypanosoma cruzi Dm28c OX=1416333 GN=TCDM_08690 PE=3 SV=1	V5BBP4
tr|V5B5E2|V5B5E2_TRYCR	29	0.703	1.458	2.89	Amidinotransferase OS=Trypanosoma cruzi Dm28c OX=1416333 GN=TCDM_02841 PE=4 SV=1	V5B5E2
tr|V5B9W8|V5B9W8_TRYCR	6	0.299	1.457	0.00185204	Uncharacterized protein OS=Trypanosoma cruzi Dm28c OX=1416333 GN=TCDM_01136 PE=4 SV=1	V5B9W8
tr|V5D7H4|V5D7H4_TRYCR	17	0.573	1.448	72800000	peptidylprolyl isomerase OS=Trypanosoma cruzi Dm28c OX=1416333 GN=TCDM_08772 PE=4 SV=1	V5D7H4
tr|V5DBS9|V5DBS9_TRYCR	11	0.105	1.447	0.0195058	Nucleoporin OS=Trypanosoma cruzi Dm28c OX=1416333 GN=TCDM_06816 PE=4 SV=1	V5DBS9
tr|V5AZ66|V5AZ66_TRYCR	39	0.578	1.444	412000	proline--tRNA ligase OS=Trypanosoma cruzi Dm28c OX=1416333 GN=TCDM_05295 PE=3 SV=1	V5AZ66
tr|V5ASA0|V5ASA0_TRYCR	58	0.732	1.443	0	threonine--tRNA ligase OS=Trypanosoma cruzi Dm28c OX=1416333 GN=TCDM_08438 PE=3 SV=1	V5ASA0
tr|V5BHV2|V5BHV2_TRYCR	18	0.402	1.44	3940000	cysteine--tRNA ligase OS=Trypanosoma cruzi Dm28c OX=1416333 GN=TCDM_05846 PE=4 SV=1	V5BHV2
tr|V5D9R6|V5D9R6_TRYCR	10	0.475	1.439	0.000352884	GRAM domain-containing protein OS=Trypanosoma cruzi Dm28c OX=1416333 GN=TCDM_07814 PE=4 SV=1	V5D9R6
tr|V5AT73|V5AT73_TRYCR	24	0.55	1.438	3860000000	Uncharacterized protein OS=Trypanosoma cruzi Dm28c OX=1416333 GN=TCDM_08046 PE=4 SV=1	V5AT73
tr|V5BI73|V5BI73_TRYCR	8	0.622	1.438	0.0437345	Glucosamine 6-phosphate N-acetyltransferase OS=Trypanosoma cruzi Dm28c OX=1416333 GN=TCDM_14202 PE=3 SV=1	V5BI73
tr|V5DIX7|V5DIX7_TRYCR	24	0.448	1.436	13800000	Spliced leader RNA PSE-promoter transcription factor OS=Trypanosoma cruzi Dm28c OX=1416333 GN=TCDM_03997 PE=3 SV=1	V5DIX7
tr|V5DSV1|V5DSV1_TRYCR	35	0.698	1.433	313	serine--tRNA ligase OS=Trypanosoma cruzi Dm28c OX=1416333 GN=TCDM_00585 PE=4 SV=1	V5DSV1
tr|V5ASG2|V5ASG2_TRYCR	19	0.353	1.422	30900000	Acetyl-coenzyme A synthetase OS=Trypanosoma cruzi Dm28c OX=1416333 GN=TCDM_08350 PE=3 SV=1	V5ASG2
tr|V5DPC1|V5DPC1_TRYCR	12	0.575	1.417	0.000186377	Electron transfer flavoprotein subunit beta OS=Trypanosoma cruzi Dm28c OX=1416333 GN=TCDM_02049 PE=3 SV=1	V5DPC1
tr|V5AKY1|V5AKY1_TRYCR	28	0.69	1.416	9680000000	Putative thimet oligopeptidase, putative,metallo-peptidase, clan MA(E), family M3 OS=Trypanosoma cruzi Dm28c OX=1416333 GN=TCDM_11091 PE=3 SV=1	V5AKY1
tr|V5BRN5|V5BRN5_TRYCR	13	0.236	1.414	0.00577003	Uncharacterized protein OS=Trypanosoma cruzi Dm28c OX=1416333 GN=TCDM_04147 PE=4 SV=1	V5BRN5
tr|V5AJG2|V5AJG2_TRYCR	44	0.768	1.412	97200	Trypanothione reductase OS=Trypanosoma cruzi Dm28c OX=1416333 GN=TCDM_11669 PE=3 SV=1	V5AJG2
tr|V5AS75|V5AS75_TRYCR	14	0.336	1.412	0.000274333	PDZ domain-containing protein OS=Trypanosoma cruzi Dm28c OX=1416333 GN=TCDM_08462 PE=4 SV=1	V5AS75
tr|V5B7J1|V5B7J1_TRYCR	7	0.662	1.412	0.00911175	Isocitrate dehydrogenase (NADP(+)) OS=Trypanosoma cruzi Dm28c OX=1416333 GN=TCDM_01966 PE=3 SV=1	V5B7J1
tr|V5BEI4|V5BEI4_TRYCR	10	0.39	1.411	0.000580746	Diphosphomevalonate decarboxylase OS=Trypanosoma cruzi Dm28c OX=1416333 GN=TCDM_09463 PE=3 SV=1	V5BEI4
tr|V5BF33|V5BF33_TRYCR	28	0.491	1.409	342000000	Transketolase OS=Trypanosoma cruzi Dm28c OX=1416333 GN=TCDM_07253 PE=3 SV=1	V5BF33
tr|V5D9G0|V5D9G0_TRYCR	15	0.232	1.408	20800000000	Uncharacterized protein OS=Trypanosoma cruzi Dm28c OX=1416333 GN=TCDM_07947 PE=4 SV=1	V5D9G0
tr|V5BSA9|V5BSA9_TRYCR	11	0.264	1.408	0.000879893	Sarcoplasmic reticulum glycoprotein OS=Trypanosoma cruzi Dm28c OX=1416333 GN=TCDM_00515 PE=4 SV=1	V5BSA9
tr|V5BMG6|V5BMG6_TRYCR	27	0.562	1.405	2500000	Thermostable carboxypeptidase 1 OS=Trypanosoma cruzi Dm28c OX=1416333 GN=TCDM_03978 PE=4 SV=1	V5BMG6
tr|V5DDW8|V5DDW8_TRYCR	27	0.422	1.405	55700000000	Eukaryotic translation initiation factor 3 subunit 8 OS=Trypanosoma cruzi Dm28c OX=1416333 GN=TCDM_05994 PE=4 SV=1	V5DDW8
tr|V5B4U5|V5B4U5_TRYCR	5	0.157	1.401	0.00899401	UBX domain-containing protein OS=Trypanosoma cruzi Dm28c OX=1416333 GN=TCDM_02984 PE=4 SV=1	V5B4U5
tr|V5B6E9|V5B6E9_TRYCR	11	0.425	1.4	0.00080868	Glycogen synthase kinase-3 alpha OS=Trypanosoma cruzi Dm28c OX=1416333 GN=TCDM_02318 PE=3 SV=1	V5B6E9
tr|V5B4S5|V5B4S5_TRYCR	21	0.542	1.399	61600000	tryptophan--tRNA ligase OS=Trypanosoma cruzi Dm28c OX=1416333 GN=TCDM_02953 PE=3 SV=1	V5B4S5
tr|V5DPM3|V5DPM3_TRYCR	9	0.16	1.399	0.00305143	glutamine--fructose-6-phosphate transaminase (isomerizing) OS=Trypanosoma cruzi Dm28c OX=1416333 GN=TCDM_01902 PE=4 SV=1	V5DPM3
tr|V5DFD4|V5DFD4_TRYCR	18	0.387	1.398	0.000185552	ABC transporter OS=Trypanosoma cruzi Dm28c OX=1416333 GN=TCDM_05370 PE=4 SV=1	V5DFD4
tr|V5DRI1|V5DRI1_TRYCR	11	0.406	1.397	0.00242123	Protein MEMO1 OS=Trypanosoma cruzi Dm28c OX=1416333 GN=TCDM_01121 PE=3 SV=1	V5DRI1
tr|V5AU76|V5AU76_TRYCR	23	0.446	1.396	9520000	glycine--tRNA ligase OS=Trypanosoma cruzi Dm28c OX=1416333 GN=TCDM_07596 PE=3 SV=1	V5AU76
tr|V5B4P6|V5B4P6_TRYCR	25	0.532	1.391	3590000	glutamine--tRNA ligase OS=Trypanosoma cruzi Dm28c OX=1416333 GN=TCDM_03150 PE=3 SV=1	V5B4P6
tr|V5BRU1|V5BRU1_TRYCR	41	0.858	1.388	15600000000	phosphopyruvate hydratase OS=Trypanosoma cruzi Dm28c OX=1416333 GN=TCDM_04067 PE=3 SV=1	V5BRU1
tr|V5DHF2|V5DHF2_TRYCR	6	0.188	1.388	0.0254811	Leucine-rich repeat protein OS=Trypanosoma cruzi Dm28c OX=1416333 GN=TCDM_04533 PE=4 SV=1	V5DHF2
tr|V5B756|V5B756_TRYCR	34	0.563	1.387	8830000	S-adenosylmethionine synthase OS=Trypanosoma cruzi Dm28c OX=1416333 GN=TCDM_02068 PE=3 SV=1	V5B756
tr|V5BE86|V5BE86_TRYCR	12	0.392	1.383	9110000000	Eukaryotic translation initiation factor 3 subunit I OS=Trypanosoma cruzi Dm28c OX=1416333 GN=TCDM_07590 PE=3 SV=1	V5BE86
tr|V5BYK6|V5BYK6_TRYCR	4	0.067	1.381	0.0155402	MYND-type domain-containing protein OS=Trypanosoma cruzi Dm28c OX=1416333 GN=TCDM_01587 PE=4 SV=1	V5BYK6
tr|V5BWY8|V5BWY8_TRYCR	11	0.629	1.38	4210000000	RNA-binding protein OS=Trypanosoma cruzi Dm28c OX=1416333 GN=TCDM_00519 PE=4 SV=1	V5BWY8
tr|V5BX78|V5BX78_TRYCR	2	0.207	1.38	0.0106664	Reticulon-like protein OS=Trypanosoma cruzi Dm28c OX=1416333 GN=TCDM_02177 PE=4 SV=1	V5BX78
tr|V5BMT3|V5BMT3_TRYCR	15	0.574	1.378	248000000	Homoserine kinase OS=Trypanosoma cruzi Dm28c OX=1416333 GN=TCDM_02119 PE=3 SV=1	V5BMT3
tr|V5B123|V5B123_TRYCR	22	0.474	1.375	0.000182682	phenylalanine--tRNA ligase OS=Trypanosoma cruzi Dm28c OX=1416333 GN=TCDM_04396 PE=3 SV=1	V5B123
tr|V5BH74|V5BH74_TRYCR	30	0.698	1.373	944	Carnitine/choline acetyltransferase OS=Trypanosoma cruzi Dm28c OX=1416333 GN=TCDM_04302 PE=3 SV=1	V5BH74
tr|V5BA65|V5BA65_TRYCR	12	0.414	1.372	0.000272525	Mitogen-activated protein kinase OS=Trypanosoma cruzi Dm28c OX=1416333 GN=TCDM_09327 PE=3 SV=1	V5BA65
tr|V5BIL0|V5BIL0_TRYCR	10	0.308	1.369	0.00111863	Ubiquitin carboxyl-terminal hydrolase OS=Trypanosoma cruzi Dm28c OX=1416333 GN=TCDM_05572 PE=3 SV=1	V5BIL0
tr|V5AW43|V5AW43_TRYCR	16	0.394	1.367	0.000436527	Unspecified product OS=Trypanosoma cruzi Dm28c OX=1416333 GN=TCDM_06755 PE=3 SV=1	V5AW43
tr|V5AZD7|V5AZD7_TRYCR	35	0.576	1.362	59.5	Translation initiation factor OS=Trypanosoma cruzi Dm28c OX=1416333 GN=TCDM_05157 PE=4 SV=1	V5AZD7
tr|V5BT19|V5BT19_TRYCR	26	0.389	1.36	1600000000	Damage-control phosphatase ARMT1-like metal-binding domain-containing protein OS=Trypanosoma cruzi Dm28c OX=1416333 GN=TCDM_01839 PE=3 SV=1	V5BT19
tr|V5B1A3|V5B1A3_TRYCR	12	0.355	1.36	0.00166685	Putative thimet oligopeptidase, putative,metallo-peptidase, clan MA(E), family M3 OS=Trypanosoma cruzi Dm28c OX=1416333 GN=TCDM_11090 PE=3 SV=1	V5B1A3
tr|V5BGW3|V5BGW3_TRYCR	32	0.68	1.355	10900000	DNA polymerase OS=Trypanosoma cruzi Dm28c OX=1416333 GN=TCDM_04366 PE=3 SV=1	V5BGW3
tr|V5BM72|V5BM72_TRYCR	22	0.327	1.354	0.000921637	IFT81 calponin homology domain-containing protein OS=Trypanosoma cruzi Dm28c OX=1416333 GN=TCDM_04037 PE=4 SV=1	V5BM72
tr|V5BW01|V5BW01_TRYCR	16	0.497	1.353	724000000	Ankyrin/TPR repeat protein OS=Trypanosoma cruzi Dm28c OX=1416333 GN=TCDM_00893 PE=4 SV=1	V5BW01
tr|V5BLF3|V5BLF3_TRYCR	8	0.366	1.352	0.001788	Uncharacterized protein OS=Trypanosoma cruzi Dm28c OX=1416333 GN=TCDM_04343 PE=4 SV=1	V5BLF3
tr|V5BNY1|V5BNY1_TRYCR	9	0.443	1.351	0.00346688	ubiquitinyl hydrolase 1 OS=Trypanosoma cruzi Dm28c OX=1416333 GN=TCDM_05173 PE=3 SV=1	V5BNY1
tr|V5BLU1|V5BLU1_TRYCR	8	0.191	1.351	0.00083503	Prokaryotic-type class I peptide chain release factors domain-containing protein OS=Trypanosoma cruzi Dm28c OX=1416333 GN=TCDM_04169 PE=3 SV=1	V5BLU1
tr|V5AS93|V5AS93_TRYCR	36	0.629	1.349	4460000	aspartate--tRNA ligase OS=Trypanosoma cruzi Dm28c OX=1416333 GN=TCDM_08491 PE=3 SV=1	V5AS93
tr|V5BH00|V5BH00_TRYCR	14	0.376	1.349	59400000000	protein-serine/threonine phosphatase OS=Trypanosoma cruzi Dm28c OX=1416333 GN=TCDM_06301 PE=4 SV=1	V5BH00
tr|V5DD75|V5DD75_TRYCR	12	0.315	1.348	0.0135841	RNA ligase (ATP) OS=Trypanosoma cruzi Dm28c OX=1416333 GN=TCDM_06217 PE=4 SV=1	V5DD75
tr|V5BRP1|V5BRP1_TRYCR	10	0.783	1.348	0.00427537	Ubiquitin-conjugating enzyme-like protein OS=Trypanosoma cruzi Dm28c OX=1416333 GN=TCDM_14383 PE=4 SV=1	V5BRP1
tr|V5BYI4|V5BYI4_TRYCR	25	0.494	1.346	75300000	UDP-N-acetylglucosamine diphosphorylase OS=Trypanosoma cruzi Dm28c OX=1416333 GN=TCDM_01555 PE=4 SV=1	V5BYI4
tr|V5BAB2|V5BAB2_TRYCR	12	0.33	1.344	0.000381625	60S ribosomal protein L13a OS=Trypanosoma cruzi Dm28c OX=1416333 GN=TCDM_07328 PE=3 SV=1	V5BAB2
tr|V5DT41|V5DT41_TRYCR	11	0.46	1.343	0.00618171	START domain-containing protein OS=Trypanosoma cruzi Dm28c OX=1416333 GN=TCDM_00685 PE=4 SV=1	V5DT41
tr|V5BBD6|V5BBD6_TRYCR	29	0.792	1.342	39300000000	Serine hydroxymethyltransferase OS=Trypanosoma cruzi Dm28c OX=1416333 GN=TCDM_06729 PE=3 SV=1	V5BBD6
tr|V5BBM3|V5BBM3_TRYCR	17	0.499	1.342	464000000	Mitochondrial RNA binding protein OS=Trypanosoma cruzi Dm28c OX=1416333 GN=TCDM_08720 PE=4 SV=1	V5BBM3
tr|V5BS95|V5BS95_TRYCR	11	0.419	1.342	22900000000	Fibrillarin OS=Trypanosoma cruzi Dm28c OX=1416333 GN=TCDM_00499 PE=3 SV=1	V5BS95
tr|V5B014|V5B014_TRYCR	9	0.123	1.341	0.0414838	Retrotransposon hot spot (RHS) protein OS=Trypanosoma cruzi Dm28c OX=1416333 GN=TCDM_11584 PE=4 SV=1	V5B014
tr|V5BUQ9|V5BUQ9_TRYCR	9	0.22	1.341	0.0081659	Uncharacterized protein OS=Trypanosoma cruzi Dm28c OX=1416333 GN=TCDM_02854 PE=4 SV=1	V5BUQ9
tr|V5BCM4|V5BCM4_TRYCR	14	0.116	1.34	0.00322199	SET domain-containing protein OS=Trypanosoma cruzi Dm28c OX=1416333 GN=TCDM_00017 PE=4 SV=1	V5BCM4
tr|V5B501|V5B501_TRYCR	12	0.225	1.338	0.00307931	Mitochondrial RNA binding complex 1 subunit OS=Trypanosoma cruzi Dm28c OX=1416333 GN=TCDM_02861 PE=4 SV=1	V5B501
tr|V5BRX2|V5BRX2_TRYCR	10	0.729	1.338	0.00346526	Cytochrome b5 OS=Trypanosoma cruzi Dm28c OX=1416333 GN=TCDM_13763 PE=3 SV=1	V5BRX2
tr|V5BZ53|V5BZ53_TRYCR	26	0.603	1.337	0.0033215	Glucose-regulated protein 78 OS=Trypanosoma cruzi Dm28c OX=1416333 GN=TCDM_01248 PE=4 SV=1	V5BZ53
tr|V5B525|V5B525_TRYCR	81	0.429	1.336	0.444	Calpain-like cysteine peptidase OS=Trypanosoma cruzi Dm28c OX=1416333 GN=TCDM_09598 PE=4 SV=1	V5B525
tr|V5BQZ6|V5BQZ6_TRYCR	18	0.306	1.334	0.00106539	Ribose-phosphate pyrophosphokinase OS=Trypanosoma cruzi Dm28c OX=1416333 GN=TCDM_04347 PE=3 SV=1	V5BQZ6
tr|V5DQS9|V5DQS9_TRYCR	10	0.413	1.334	296000000	dTDP-glucose 4,6-dehydratase OS=Trypanosoma cruzi Dm28c OX=1416333 GN=TCDM_01515 PE=4 SV=1	V5DQS9
tr|V5B1P3|V5B1P3_TRYCR	21	0.766	1.333	311000000000	Oxidoreductase OS=Trypanosoma cruzi Dm28c OX=1416333 GN=TCDM_04274 PE=4 SV=1	V5B1P3
tr|V5BLD6|V5BLD6_TRYCR	4	0.398	1.331	0.0248997	Cyclin-dependent kinases regulatory subunit OS=Trypanosoma cruzi Dm28c OX=1416333 GN=TCDM_13938 PE=3 SV=1	V5BLD6
tr|V5BIV9|V5BIV9_TRYCR	21	0.484	1.322	0.000231848	D-isomer specific 2-hydroxyacid dehydrogenase-protein OS=Trypanosoma cruzi Dm28c OX=1416333 GN=TCDM_03589 PE=4 SV=1	V5BIV9
tr|V5BNS6|V5BNS6_TRYCR	14	0.569	1.321	0.00340487	Eukaryotic translation initiation factor 3 subunit h OS=Trypanosoma cruzi Dm28c OX=1416333 GN=TCDM_01711 PE=4 SV=1	V5BNS6
tr|V5BHY9|V5BHY9_TRYCR	13	0.55	1.317	0.000454364	3,2-trans-enoyl-CoA isomerase OS=Trypanosoma cruzi Dm28c OX=1416333 GN=TCDM_03994 PE=3 SV=1	V5BHY9
tr|V5BYR2|V5BYR2_TRYCR	26	0.523	1.315	281000000	Polyadenylate-binding protein OS=Trypanosoma cruzi Dm28c OX=1416333 GN=TCDM_01672 PE=3 SV=1	V5BYR2
tr|V5B8Z6|V5B8Z6_TRYCR	8	0.468	1.313	0.0004915	Flavoprotein domain-containing protein OS=Trypanosoma cruzi Dm28c OX=1416333 GN=TCDM_01440 PE=3 SV=1	V5B8Z6
tr|V5B5L8|V5B5L8_TRYCR	41	0.618	1.311	4190000	Delta-1-pyrroline-5-carboxylate synthase OS=Trypanosoma cruzi Dm28c OX=1416333 GN=TCDM_02659 PE=3 SV=1	V5B5L8
tr|V5BNT4|V5BNT4_TRYCR	8	0.28	1.31	0.0318351	Swiss Army Knife RNA repair protein HAD domain-containing protein OS=Trypanosoma cruzi Dm28c OX=1416333 GN=TCDM_05241 PE=4 SV=1	V5BNT4
tr|V5BJK3|V5BJK3_TRYCR	7	0.352	1.306	0.0160462	40S ribosomal protein S8 OS=Trypanosoma cruzi Dm28c OX=1416333 GN=TCDM_07254 PE=3 SV=1	V5BJK3
tr|V5BB72|V5BB72_TRYCR	4	0.193	1.302	0.0474465	RING-type E3 ubiquitin transferase OS=Trypanosoma cruzi Dm28c OX=1416333 GN=TCDM_08897 PE=4 SV=1	V5BB72
tr|V5B3E2|V5B3E2_TRYCR	35	0.749	1.3	329000000	D-isomer specific 2-hydroxyacid dehydrogenase-protein OS=Trypanosoma cruzi Dm28c OX=1416333 GN=TCDM_03590 PE=4 SV=1	V5B3E2
tr|V5BZY0|V5BZY0_TRYCR	11	0.411	1.299	114000000000	Ubiquitin-like protein OS=Trypanosoma cruzi Dm28c OX=1416333 GN=TCDM_01190 PE=4 SV=1	V5BZY0
tr|V5B5K9|V5B5K9_TRYCR	9	0.382	1.298	0.000782985	Serine/threonine-protein phosphatase OS=Trypanosoma cruzi Dm28c OX=1416333 GN=TCDM_02647 PE=3 SV=1	V5B5K9
tr|V5BKU4|V5BKU4_TRYCR	15	0.564	1.295	559000000000	Serine/threonine-protein phosphatase OS=Trypanosoma cruzi Dm28c OX=1416333 GN=TCDM_04570 PE=3 SV=1	V5BKU4
tr|V5BC41|V5BC41_TRYCR	11	0.3	1.295	0.00425658	Vacuolar protein sorting-associated protein 4 OS=Trypanosoma cruzi Dm28c OX=1416333 GN=TCDM_00277 PE=3 SV=1	V5BC41
tr|V5AUF3|V5AUF3_TRYCR	39	0.624	1.293	6760000	Stress-induced protein sti1 OS=Trypanosoma cruzi Dm28c OX=1416333 GN=TCDM_07494 PE=4 SV=1	V5AUF3
tr|V5BSN3|V5BSN3_TRYCR	27	0.756	1.293	186000000	Elongation initiation factor 2 alpha subunit OS=Trypanosoma cruzi Dm28c OX=1416333 GN=TCDM_00323 PE=3 SV=1	V5BSN3
tr|V5BGL9|V5BGL9_TRYCR	7	0.371	1.291	0.00657597	Proteasome beta 3 subunit OS=Trypanosoma cruzi Dm28c OX=1416333 GN=TCDM_14499 PE=4 SV=1	V5BGL9
tr|V5C274|V5C274_TRYCR	13	0.354	1.29	0.00459589	Ubiquitin-like domain-containing protein OS=Trypanosoma cruzi Dm28c OX=1416333 GN=TCDM_00354 PE=4 SV=1	V5C274
tr|V5BLK4|V5BLK4_TRYCR	3	0.308	1.29	0.00233594	Small ubiquitin protein OS=Trypanosoma cruzi Dm28c OX=1416333 GN=TCDM_14309 PE=4 SV=1	V5BLK4
tr|V5BSU8|V5BSU8_TRYCR	12	0.268	1.287	0.0323878	Uncharacterized protein OS=Trypanosoma cruzi Dm28c OX=1416333 GN=TCDM_03691 PE=4 SV=1	V5BSU8
tr|V5AQW3|V5AQW3_TRYCR	10	0.165	1.284	0.009673	Retrotransposon hot spot (RHS) protein OS=Trypanosoma cruzi Dm28c OX=1416333 GN=TCDM_09109 PE=4 SV=1	V5AQW3
tr|V5BBQ6|V5BBQ6_TRYCR	7	0.235	1.284	0.0117784	Histone chaperone RTT106/FACT complex subunit SPT16-like middle domain-containing protein OS=Trypanosoma cruzi Dm28c OX=1416333 GN=TCDM_00447 PE=4 SV=1	V5BBQ6
tr|V5D8M5|V5D8M5_TRYCR	18	0.442	1.278	52600000	Metal binding protein OS=Trypanosoma cruzi Dm28c OX=1416333 GN=TCDM_08257 PE=3 SV=1	V5D8M5
tr|V5B7D4|V5B7D4_TRYCR	32	0.4	1.277	3610000000	valine--tRNA ligase OS=Trypanosoma cruzi Dm28c OX=1416333 GN=TCDM_14317 PE=3 SV=1	V5B7D4
tr|V5BGE7|V5BGE7_TRYCR	21	0.469	1.277	47900000000	Eukaryotic peptide chain release factor subunit 1 OS=Trypanosoma cruzi Dm28c OX=1416333 GN=TCDM_04483 PE=3 SV=1	V5BGE7
tr|V5BKK3|V5BKK3_TRYCR	5	0.201	1.265	0.0271743	BAR domain-containing protein OS=Trypanosoma cruzi Dm28c OX=1416333 GN=TCDM_04619 PE=4 SV=1	V5BKK3
tr|V5BEF5|V5BEF5_TRYCR	12	0.449	1.264	0.00158532	Phosphoribosylpyrophosphate synthetase OS=Trypanosoma cruzi Dm28c OX=1416333 GN=TCDM_07491 PE=3 SV=1	V5BEF5
tr|V5DBB0|V5DBB0_TRYCR	15	0.372	1.263	0.000210427	Replication protein A subunit OS=Trypanosoma cruzi Dm28c OX=1416333 GN=TCDM_07088 PE=3 SV=1	V5DBB0
tr|V5APL8|V5APL8_TRYCR	60	0.415	1.262	67100000	Calpain catalytic domain-containing protein OS=Trypanosoma cruzi Dm28c OX=1416333 GN=TCDM_09599 PE=4 SV=1	V5APL8
tr|V5BHV5|V5BHV5_TRYCR	39	0.441	1.262	29100000	Pitrilysin-like metalloprotease OS=Trypanosoma cruzi Dm28c OX=1416333 GN=TCDM_07985 PE=3 SV=1	V5BHV5
tr|V5C2U9|V5C2U9_TRYCR	21	0.574	1.262	0.000341852	Dihydroxyacetone kinase OS=Trypanosoma cruzi Dm28c OX=1416333 GN=TCDM_00153 PE=4 SV=1	V5C2U9
tr|V5BJS6|V5BJS6_TRYCR	9	0.207	1.261	0.0244226	Uncharacterized protein OS=Trypanosoma cruzi Dm28c OX=1416333 GN=TCDM_07108 PE=4 SV=1	V5BJS6
tr|V5BLX0|V5BLX0_TRYCR	7	0.38	1.261	0.015318	Mitochondrial structure specific endonuclease I (SSE-1) OS=Trypanosoma cruzi Dm28c OX=1416333 GN=TCDM_04236 PE=4 SV=1	V5BLX0
tr|V5BNS0|V5BNS0_TRYCR	41	0.721	1.26	627000000	T-complex protein 1 subunit gamma OS=Trypanosoma cruzi Dm28c OX=1416333 GN=TCDM_05217 PE=3 SV=1	V5BNS0
tr|V5DIJ0|V5DIJ0_TRYCR	9	0.541	1.259	0.000573764	Ran-binding protein 1 OS=Trypanosoma cruzi Dm28c OX=1416333 GN=TCDM_14333 PE=4 SV=1	V5DIJ0
tr|V5BFY9|V5BFY9_TRYCR	3	0.372	1.259	0.0426094	Ubiquitin OS=Trypanosoma cruzi Dm28c OX=1416333 GN=TCDM_14369 PE=4 SV=1	V5BFY9
tr|V5BEF0|V5BEF0_TRYCR	12	0.305	1.256	0.000211032	Guide RNA binding protein OS=Trypanosoma cruzi Dm28c OX=1416333 GN=TCDM_07483 PE=4 SV=1	V5BEF0
tr|V5BN65|V5BN65_TRYCR	8	0.358	1.256	0.019069	Kinesin OS=Trypanosoma cruzi Dm28c OX=1416333 GN=TCDM_02002 PE=4 SV=1	V5BN65
tr|V5B946|V5B946_TRYCR	5	0.233	1.255	0.020448	Alpha N-terminal protein methyltransferase 1 OS=Trypanosoma cruzi Dm28c OX=1416333 GN=TCDM_01524 PE=3 SV=1	V5B946
tr|V5BFS2|V5BFS2_TRYCR	5	0.344	1.254	0.0135264	U2A'/phosphoprotein 32 family A C-terminal domain-containing protein OS=Trypanosoma cruzi Dm28c OX=1416333 GN=TCDM_08913 PE=3 SV=1	V5BFS2
tr|V5BLT9|V5BLT9_TRYCR	14	0.345	1.253	4600000000	Mitogen activated protein kinase OS=Trypanosoma cruzi Dm28c OX=1416333 GN=TCDM_06097 PE=4 SV=1	V5BLT9
tr|V5DJR0|V5DJR0_TRYCR	8	0.312	1.253	0.042188	Trypanosoma Tc-38 (p38) protein domain-containing protein OS=Trypanosoma cruzi Dm28c OX=1416333 GN=TCDM_03713 PE=4 SV=1	V5DJR0
tr|V5D7P4|V5D7P4_TRYCR	46	0.522	1.25	261000000	Aminopeptidase OS=Trypanosoma cruzi Dm28c OX=1416333 GN=TCDM_08696 PE=3 SV=1	V5D7P4
tr|V5BGJ6|V5BGJ6_TRYCR	20	0.622	1.25	1460000000	Rab GDP dissociation inhibitor OS=Trypanosoma cruzi Dm28c OX=1416333 GN=TCDM_06527 PE=3 SV=1	V5BGJ6
tr|V5AJF7|V5AJF7_TRYCR	23	0.621	1.247	17200000	glucose-6-phosphate dehydrogenase (NADP(+)) OS=Trypanosoma cruzi Dm28c OX=1416333 GN=TCDM_11676 PE=3 SV=1	V5AJF7
tr|V5BPL8|V5BPL8_TRYCR	15	0.577	1.246	0.00015283	pyridoxal kinase OS=Trypanosoma cruzi Dm28c OX=1416333 GN=TCDM_01468 PE=3 SV=1	V5BPL8
tr|V5D8S7|V5D8S7_TRYCR	6	0.194	1.246	0.0486037	Glycosomal membrane protein OS=Trypanosoma cruzi Dm28c OX=1416333 GN=TCDM_08155 PE=4 SV=1	V5D8S7
tr|V5BMU5|V5BMU5_TRYCR	10	0.667	1.242	0.000105414	Adenylate kinase OS=Trypanosoma cruzi Dm28c OX=1416333 GN=TCDM_13973 PE=3 SV=1	V5BMU5
tr|V5BI68|V5BI68_TRYCR	9	0.443	1.242	0.00385878	Mitochondrial DNA topoisomerase II OS=Trypanosoma cruzi Dm28c OX=1416333 GN=TCDM_03890 PE=4 SV=1	V5BI68
tr|V5BIK5|V5BIK5_TRYCR	10	0.208	1.241	0.00190327	Nucleolar protein OS=Trypanosoma cruzi Dm28c OX=1416333 GN=TCDM_05566 PE=3 SV=1	V5BIK5
tr|V5BGU1|V5BGU1_TRYCR	8	0.155	1.239	0.00321205	Bystin OS=Trypanosoma cruzi Dm28c OX=1416333 GN=TCDM_08488 PE=3 SV=1	V5BGU1
tr|V5BKY5|V5BKY5_TRYCR	10	0.246	1.238	0.000109174	Developmentally regulated GTP-binding protein OS=Trypanosoma cruzi Dm28c OX=1416333 GN=TCDM_06584 PE=4 SV=1	V5BKY5
tr|V5AVE3|V5AVE3_TRYCR	12	0.604	1.236	235000000000	SKP1 component dimerisation domain-containing protein OS=Trypanosoma cruzi Dm28c OX=1416333 GN=TCDM_14147 PE=4 SV=1	V5AVE3
tr|V5B860|V5B860_TRYCR	39	0.571	1.233	0.000109917	Prolyl endopeptidase OS=Trypanosoma cruzi Dm28c OX=1416333 GN=TCDM_08245 PE=3 SV=1	V5B860
tr|V5B1M8|V5B1M8_TRYCR	12	0.407	1.233	4350000000	High mobility group protein OS=Trypanosoma cruzi Dm28c OX=1416333 GN=TCDM_04259 PE=4 SV=1	V5B1M8
tr|V5BR85|V5BR85_TRYCR	35	0.539	1.232	394000	Generic methyltransferase OS=Trypanosoma cruzi Dm28c OX=1416333 GN=TCDM_04267 PE=4 SV=1	V5BR85
tr|V5DGS5|V5DGS5_TRYCR	38	0.486	1.231	22800000	asparagine--tRNA ligase OS=Trypanosoma cruzi Dm28c OX=1416333 GN=TCDM_04713 PE=4 SV=1	V5DGS5
tr|V5BJY2|V5BJY2_TRYCR	11	0.309	1.231	0.00752159	RanBP2-type domain-containing protein OS=Trypanosoma cruzi Dm28c OX=1416333 GN=TCDM_03227 PE=4 SV=1	V5BJY2
tr|V5ARR9|V5ARR9_TRYCR	18	0.557	1.23	0.0106332	Thiamin pyrophosphokinase thiamin-binding domain-containing protein OS=Trypanosoma cruzi Dm28c OX=1416333 GN=TCDM_08695 PE=4 SV=1	V5ARR9
tr|V5BFI6|V5BFI6_TRYCR	2	0.026	1.227	0.0452467	Uncharacterized protein OS=Trypanosoma cruzi Dm28c OX=1416333 GN=TCDM_06928 PE=4 SV=1	V5BFI6
tr|V5BA34|V5BA34_TRYCR	17	0.712	1.226	25800000000	Stress-inducible protein STI1 OS=Trypanosoma cruzi Dm28c OX=1416333 GN=TCDM_01239 PE=4 SV=1	V5BA34
tr|V5B1R9|V5B1R9_TRYCR	25	0.285	1.225	22200000000	DRBM domain-containing protein OS=Trypanosoma cruzi Dm28c OX=1416333 GN=TCDM_04320 PE=4 SV=1	V5B1R9
tr|V5DN32|V5DN32_TRYCR	10	0.225	1.225	0.0489477	Serine/threonine-protein phosphatase 4 regulatory subunit 1 OS=Trypanosoma cruzi Dm28c OX=1416333 GN=TCDM_02365 PE=4 SV=1	V5DN32
tr|V5C1M1|V5C1M1_TRYCR	36	0.81	1.224	2710000	Pyruvate kinase OS=Trypanosoma cruzi Dm28c OX=1416333 GN=TCDM_00417 PE=3 SV=1	V5C1M1
tr|V5DMK2|V5DMK2_TRYCR	10	0.191	1.222	0.0397368	Uncharacterized protein OS=Trypanosoma cruzi Dm28c OX=1416333 GN=TCDM_02585 PE=3 SV=1	V5DMK2
tr|V5BDR9|V5BDR9_TRYCR	22	0.345	1.221	0.000964128	Uncharacterized protein OS=Trypanosoma cruzi Dm28c OX=1416333 GN=TCDM_09783 PE=4 SV=1	V5BDR9
tr|V5BN56|V5BN56_TRYCR	6	0.383	1.221	0.0359053	Mucin-associated surface protein (MASP) OS=Trypanosoma cruzi Dm28c OX=1416333 GN=TCDM_01989 PE=4 SV=1	V5BN56
tr|V5BQQ0|V5BQQ0_TRYCR	11	0.329	1.216	0.00398773	SB domain-containing protein OS=Trypanosoma cruzi Dm28c OX=1416333 GN=TCDM_04417 PE=4 SV=1	V5BQQ0
tr|V5BYJ7|V5BYJ7_TRYCR	11	0.278	1.214	69900000000	Nucleoporin OS=Trypanosoma cruzi Dm28c OX=1416333 GN=TCDM_01574 PE=4 SV=1	V5BYJ7
tr|V5BPW0|V5BPW0_TRYCR	10	0.634	1.212	0.000543393	Bromo domain-containing protein OS=Trypanosoma cruzi Dm28c OX=1416333 GN=TCDM_14496 PE=4 SV=1	V5BPW0
tr|V5DH11|V5DH11_TRYCR	23	0.557	1.211	1020000000	La RNA binding protein OS=Trypanosoma cruzi Dm28c OX=1416333 GN=TCDM_04685 PE=4 SV=1	V5DH11
tr|V5A515|V5A515_TRYCR	11	0.479	1.21	0.00232686	Short chain dehydrogenase OS=Trypanosoma cruzi Dm28c OX=1416333 GN=TCDM_12658 PE=3 SV=1	V5A515
tr|V5BLX4|V5BLX4_TRYCR	13	0.554	1.209	60100000000	Proteasome subunit alpha type OS=Trypanosoma cruzi Dm28c OX=1416333 GN=TCDM_04244 PE=3 SV=1	V5BLX4
tr|V5D6X4|V5D6X4_TRYCR	12	0.372	1.209	60400000000	Cell division protein kinase 2,cdc2-related protein kinase 1 OS=Trypanosoma cruzi Dm28c OX=1416333 GN=TCDM_09017 PE=3 SV=1	V5D6X4
tr|V5BDZ0|V5BDZ0_TRYCR	8	0.438	1.209	0.0037697	N-acetyltransferase complex ARD1 subunit OS=Trypanosoma cruzi Dm28c OX=1416333 GN=TCDM_07758 PE=3 SV=1	V5BDZ0
tr|V5B0M9|V5B0M9_TRYCR	9	0.476	1.208	0.0196441	Dihydrolipoamide acetyltransferase OS=Trypanosoma cruzi Dm28c OX=1416333 GN=TCDM_04684 PE=3 SV=1	V5B0M9
tr|V5BSV4|V5BSV4_TRYCR	9	0.513	1.207	0.0189978	inorganic diphosphatase OS=Trypanosoma cruzi Dm28c OX=1416333 GN=TCDM_13977 PE=3 SV=1	V5BSV4
tr|V5B7X1|V5B7X1_TRYCR	6	0.532	1.207	0.00154832	Small nuclear ribonucleoprotein Sm D2 OS=Trypanosoma cruzi Dm28c OX=1416333 GN=TCDM_14226 PE=3 SV=1	V5B7X1
tr|V5DDD6|V5DDD6_TRYCR	17	0.213	1.206	0.0360656	Structural maintenance of chromosome 3 protein OS=Trypanosoma cruzi Dm28c OX=1416333 GN=TCDM_06168 PE=3 SV=1	V5DDD6
tr|V5BRS6|V5BRS6_TRYCR	5	0.139	1.206	0.0041145	Deoxyhypusine synthase OS=Trypanosoma cruzi Dm28c OX=1416333 GN=TCDM_04050 PE=3 SV=1	V5BRS6
tr|V5AWB3|V5AWB3_TRYCR	8	0.408	1.205	0.00202495	Proteasome alpha 7 subunit OS=Trypanosoma cruzi Dm28c OX=1416333 GN=TCDM_06617 PE=3 SV=1	V5AWB3
tr|V5BQA6|V5BQA6_TRYCR	14	0.344	1.204	0.00822024	Phosphoribosylpyrophosphate synthetase OS=Trypanosoma cruzi Dm28c OX=1416333 GN=TCDM_02935 PE=3 SV=1	V5BQA6
tr|V5B0K2|V5B0K2_TRYCR	28	0.44	1.202	910000	Major vault protein OS=Trypanosoma cruzi Dm28c OX=1416333 GN=TCDM_04639 PE=4 SV=1	V5B0K2
tr|V5C2R1|V5C2R1_TRYCR	8	0.197	1.201	0.00388884	Rab7 GTP binding protein OS=Trypanosoma cruzi Dm28c OX=1416333 GN=TCDM_00086 PE=3 SV=1	V5C2R1
tr|V5BG02|V5BG02_TRYCR	40	0.712	1.198	30900000	Calpain cysteine peptidase OS=Trypanosoma cruzi Dm28c OX=1416333 GN=TCDM_08842 PE=4 SV=1	V5BG02
tr|V5BQI6|V5BQI6_TRYCR	21	0.543	1.197	14900000000	Mitochondrial RNA binding complex 1 subunit OS=Trypanosoma cruzi Dm28c OX=1416333 GN=TCDM_01202 PE=4 SV=1	V5BQI6
tr|V5DC73|V5DC73_TRYCR	15	0.473	1.196	6120000000	CSD domain-containing protein OS=Trypanosoma cruzi Dm28c OX=1416333 GN=TCDM_06757 PE=4 SV=1	V5DC73
tr|V5B780|V5B780_TRYCR	22	0.607	1.195	2010000	3-hydroxy-3-methylglutaryl coenzyme A reductase OS=Trypanosoma cruzi Dm28c OX=1416333 GN=TCDM_02105 PE=3 SV=1	V5B780
tr|V5DQ49|V5DQ49_TRYCR	6	0.246	1.194	0.0108175	Proteasome regulatory non-ATPase subunit OS=Trypanosoma cruzi Dm28c OX=1416333 GN=TCDM_01812 PE=3 SV=1	V5DQ49
tr|V5BI97|V5BI97_TRYCR	23	0.291	1.193	1320000000	Putative Unc104-like kinesin OS=Trypanosoma cruzi Dm28c OX=1416333 GN=TCDM_07833 PE=4 SV=1	V5BI97
tr|V5BQH1|V5BQH1_TRYCR	7	0.51	1.19	0.00551307	Putative Mitochondrial elongation factor G OS=Trypanosoma cruzi Dm28c OX=1416333 GN=TCDM_01186 PE=4 SV=1	V5BQH1
tr|V5D8P7|V5D8P7_TRYCR	32	0.446	1.188	2410000000	Eukaryotic translation initiation factor 3 subunit a OS=Trypanosoma cruzi Dm28c OX=1416333 GN=TCDM_08229 PE=4 SV=1	V5D8P7
tr|V5BPE1|V5BPE1_TRYCR	20	0.403	1.188	12400000000	Major vault protein OS=Trypanosoma cruzi Dm28c OX=1416333 GN=TCDM_03163 PE=4 SV=1	V5BPE1
tr|V5BZ97|V5BZ97_TRYCR	20	0.566	1.186	0.000198658	Asparagine synthetase a OS=Trypanosoma cruzi Dm28c OX=1416333 GN=TCDM_01307 PE=4 SV=1	V5BZ97
tr|V5DA02|V5DA02_TRYCR	13	0.162	1.185	0.0447625	Protein transport protein Sec23A OS=Trypanosoma cruzi Dm28c OX=1416333 GN=TCDM_07654 PE=4 SV=1	V5DA02
tr|V5BDQ2|V5BDQ2_TRYCR	27	0.774	1.183	67200000000	Uncharacterized protein OS=Trypanosoma cruzi Dm28c OX=1416333 GN=TCDM_07871 PE=3 SV=1	V5BDQ2
tr|V5BGG8|V5BGG8_TRYCR	24	0.641	1.183	0.00488215	Tyrosine aminotransferase OS=Trypanosoma cruzi Dm28c OX=1416333 GN=TCDM_06595 PE=3 SV=1	V5BGG8
tr|V5DQA0|V5DQA0_TRYCR	40	0.714	1.178	8050000	Carboxypeptidase OS=Trypanosoma cruzi Dm28c OX=1416333 GN=TCDM_01553 PE=4 SV=1	V5DQA0
tr|V5BIS2|V5BIS2_TRYCR	8	0.198	1.178	0.00312117	Uncharacterized protein OS=Trypanosoma cruzi Dm28c OX=1416333 GN=TCDM_07535 PE=4 SV=1	V5BIS2
tr|V5BQJ1|V5BQJ1_TRYCR	23	0.647	1.177	5840000	RuvB-like helicase OS=Trypanosoma cruzi Dm28c OX=1416333 GN=TCDM_02843 PE=3 SV=1	V5BQJ1
tr|V5C2V4|V5C2V4_TRYCR	33	0.639	1.175	0.00137745	6-phosphogluconate dehydrogenase, decarboxylating OS=Trypanosoma cruzi Dm28c OX=1416333 GN=TCDM_00158 PE=3 SV=1	V5C2V4
tr|V5BV76|V5BV76_TRYCR	13	0.352	1.175	0.000216557	Eukaryotic translation initiation factor 3 subunit L OS=Trypanosoma cruzi Dm28c OX=1416333 GN=TCDM_01223 PE=4 SV=1	V5BV76
tr|V5BRQ8|V5BRQ8_TRYCR	28	0.528	1.174	165000	Alcohol dehydrogenase OS=Trypanosoma cruzi Dm28c OX=1416333 GN=TCDM_02375 PE=3 SV=1	V5BRQ8
tr|V5D8D2|V5D8D2_TRYCR	19	0.608	1.172	57800000000	Haloacid dehalogenase-like hydrolase OS=Trypanosoma cruzi Dm28c OX=1416333 GN=TCDM_08376 PE=3 SV=1	V5D8D2
tr|V5C1F1|V5C1F1_TRYCR	7	0.416	1.171	0.00273558	Small GTP-binding protein RAB6 OS=Trypanosoma cruzi Dm28c OX=1416333 GN=TCDM_14273 PE=4 SV=1	V5C1F1
tr|V5B118|V5B118_TRYCR	12	0.326	1.17	0.0101436	RRM domain-containing protein OS=Trypanosoma cruzi Dm28c OX=1416333 GN=TCDM_04390 PE=4 SV=1	V5B118
tr|V5B980|V5B980_TRYCR	10	0.285	1.17	0.000114974	Putative Unc104-like kinesin OS=Trypanosoma cruzi Dm28c OX=1416333 GN=TCDM_07834 PE=4 SV=1	V5B980
tr|V5BHF5|V5BHF5_TRYCR	11	0.464	1.169	0.0264781	Peptidyl-prolyl cis-trans isomerase OS=Trypanosoma cruzi Dm28c OX=1416333 GN=TCDM_14238 PE=3 SV=1	V5BHF5
tr|V5DH66|V5DH66_TRYCR	10	0.306	1.169	0.00926846	VPS37 C-terminal domain-containing protein OS=Trypanosoma cruzi Dm28c OX=1416333 GN=TCDM_04583 PE=3 SV=1	V5DH66
tr|V5DFW5|V5DFW5_TRYCR	17	0.29	1.168	0.000206139	Pumilio/PUF RNA binding protein 7 OS=Trypanosoma cruzi Dm28c OX=1416333 GN=TCDM_05087 PE=4 SV=1	V5DFW5
tr|V5D316|V5D316_TRYCR	18	0.686	1.167	114000000000	Thymidylate kinase-like domain-containing protein OS=Trypanosoma cruzi Dm28c OX=1416333 GN=TCDM_14430 PE=3 SV=1	V5D316
tr|V5AS86|V5AS86_TRYCR	8	0.267	1.165	0.020508	Uncharacterized protein OS=Trypanosoma cruzi Dm28c OX=1416333 GN=TCDM_08476 PE=4 SV=1	V5AS86
tr|V5DD27|V5DD27_TRYCR	18	0.765	1.162	0.000424207	2-hydroxy-3-oxopropionate reductase OS=Trypanosoma cruzi Dm28c OX=1416333 GN=TCDM_06272 PE=3 SV=1	V5DD27
tr|V5DLP2|V5DLP2_TRYCR	19	0.269	1.16	0.0389812	Paraflagellar rod component OS=Trypanosoma cruzi Dm28c OX=1416333 GN=TCDM_02927 PE=4 SV=1	V5DLP2
tr|V5C2S4|V5C2S4_TRYCR	38	0.727	1.159	6480000	T-complex protein 1 subunit eta OS=Trypanosoma cruzi Dm28c OX=1416333 GN=TCDM_00106 PE=3 SV=1	V5C2S4
tr|V5BE45|V5BE45_TRYCR	12	0.554	1.159	0.000669963	Calpain-like cysteine peptidase OS=Trypanosoma cruzi Dm28c OX=1416333 GN=TCDM_09597 PE=4 SV=1	V5BE45
tr|V5AV36|V5AV36_TRYCR	20	0.256	1.157	505000000000	Eukaryotic translation initiation factor 5B OS=Trypanosoma cruzi Dm28c OX=1416333 GN=TCDM_07185 PE=3 SV=1	V5AV36
tr|V5C230|V5C230_TRYCR	63	0.509	1.155	0	SAM domain-containing protein OS=Trypanosoma cruzi Dm28c OX=1416333 GN=TCDM_00291 PE=4 SV=1	V5C230
tr|V5BA03|V5BA03_TRYCR	9	0.372	1.155	0.00300601	Protein phosphatase 2C OS=Trypanosoma cruzi Dm28c OX=1416333 GN=TCDM_01192 PE=4 SV=1	V5BA03
tr|V5B9V5|V5B9V5_TRYCR	6	0.393	1.155	0.0049769	(H )-ATPase G subunit OS=Trypanosoma cruzi Dm28c OX=1416333 GN=TCDM_11273 PE=3 SV=1	V5B9V5
tr|V5BQK5|V5BQK5_TRYCR	38	0.553	1.153	182	arginine--tRNA ligase OS=Trypanosoma cruzi Dm28c OX=1416333 GN=TCDM_04526 PE=3 SV=1	V5BQK5
tr|V5BHU4|V5BHU4_TRYCR	31	0.55	1.153	2030000	Mitochondrial RNA binding complex 1 subunit OS=Trypanosoma cruzi Dm28c OX=1416333 GN=TCDM_03925 PE=4 SV=1	V5BHU4
tr|V5D5S2|V5D5S2_TRYCR	13	0.345	1.153	0.0229936	Serine/threonine-protein phosphatase 5 OS=Trypanosoma cruzi Dm28c OX=1416333 GN=TCDM_09445 PE=3 SV=1	V5D5S2
tr|V5BT61|V5BT61_TRYCR	20	0.441	1.152	0.0020182	CCR4-NOT transcription complex subunit 10 OS=Trypanosoma cruzi Dm28c OX=1416333 GN=TCDM_03446 PE=3 SV=1	V5BT61
tr|V5B9Z7|V5B9Z7_TRYCR	13	0.255	1.152	0.00789137	Mitochondrial elongation factor G OS=Trypanosoma cruzi Dm28c OX=1416333 GN=TCDM_01187 PE=4 SV=1	V5B9Z7
tr|V5DCK0|V5DCK0_TRYCR	7	0.139	1.152	0.00169207	Vacuolar protein sorting-associated protein OS=Trypanosoma cruzi Dm28c OX=1416333 GN=TCDM_06581 PE=3 SV=1	V5DCK0
tr|V5BVY2|V5BVY2_TRYCR	43	0.787	1.148	26700	Aspartate aminotransferase OS=Trypanosoma cruzi Dm28c OX=1416333 GN=TCDM_00869 PE=3 SV=1	V5BVY2
tr|V5DD63|V5DD63_TRYCR	20	0.169	1.147	0.000843306	Uncharacterized protein OS=Trypanosoma cruzi Dm28c OX=1416333 GN=TCDM_06198 PE=4 SV=1	V5DD63
tr|V5C0C4|V5C0C4_TRYCR	11	0.461	1.147	0.0010128	Deoxyhypusine synthase OS=Trypanosoma cruzi Dm28c OX=1416333 GN=TCDM_01050 PE=3 SV=1	V5C0C4
tr|V5DCR9|V5DCR9_TRYCR	8	0.558	1.146	0.000185209	Replication Factor A 28 kDa subunit OS=Trypanosoma cruzi Dm28c OX=1416333 GN=TCDM_06470 PE=4 SV=1	V5DCR9
tr|V5ASE8|V5ASE8_TRYCR	12	0.334	1.144	0.00218743	Probable eukaryotic initiation factor 4A OS=Trypanosoma cruzi Dm28c OX=1416333 GN=TCDM_08391 PE=3 SV=1	V5ASE8
tr|V5DSJ9|V5DSJ9_TRYCR	7	0.118	1.143	0.006899	Kinesin-like protein OS=Trypanosoma cruzi Dm28c OX=1416333 GN=TCDM_00837 PE=3 SV=1	V5DSJ9
tr|V5DIM8|V5DIM8_TRYCR	20	0.605	1.142	0.000290559	Eukaryotic translation initiation factor 5 OS=Trypanosoma cruzi Dm28c OX=1416333 GN=TCDM_04053 PE=3 SV=1	V5DIM8
tr|V5D9U0|V5D9U0_TRYCR	14	0.269	1.142	0.00269358	Transmembrane 9 superfamily member OS=Trypanosoma cruzi Dm28c OX=1416333 GN=TCDM_07779 PE=3 SV=1	V5D9U0
tr|V5BMW5|V5BMW5_TRYCR	6	0.423	1.142	0.00397323	Putative 2-aminoethylphosphonate:pyruvateaminotransferase-likeprotein,putative OS=Trypanosoma cruzi Dm28c OX=1416333 GN=TCDM_05587 PE=4 SV=1	V5BMW5
tr|V5D2K6|V5D2K6_TRYCR	10	0.932	1.14	0.000168644	EF-hand domain-containing protein OS=Trypanosoma cruzi Dm28c OX=1416333 GN=TCDM_10682 PE=4 SV=1	V5D2K6
tr|V5AMF2|V5AMF2_TRYCR	4	0.289	1.14	0.0147226	Monothiol glutaredoxin OS=Trypanosoma cruzi Dm28c OX=1416333 GN=TCDM_14321 PE=4 SV=1	V5AMF2
tr|V5B5X6|V5B5X6_TRYCR	22	0.645	1.139	10200000000	Proteasome regulatory ATPase subunit 2 OS=Trypanosoma cruzi Dm28c OX=1416333 GN=TCDM_02541 PE=3 SV=1	V5B5X6
tr|V5BNW8|V5BNW8_TRYCR	16	0.528	1.139	183000000000	Vacuolar import/degradation Vid27 C-terminal domain-containing protein OS=Trypanosoma cruzi Dm28c OX=1416333 GN=TCDM_01781 PE=4 SV=1	V5BNW8
tr|V5BXU6|V5BXU6_TRYCR	6	0.139	1.139	0.0343411	Uncharacterized protein OS=Trypanosoma cruzi Dm28c OX=1416333 GN=TCDM_01898 PE=4 SV=1	V5BXU6
tr|V5B579|V5B579_TRYCR	27	0.578	1.138	83400000	RuvB-like helicase OS=Trypanosoma cruzi Dm28c OX=1416333 GN=TCDM_02750 PE=3 SV=1	V5B579
tr|V5BI61|V5BI61_TRYCR	16	0.275	1.136	0.00117751	Heat shock protein 70 OS=Trypanosoma cruzi Dm28c OX=1416333 GN=TCDM_07862 PE=3 SV=1	V5BI61
tr|V5BP86|V5BP86_TRYCR	27	0.744	1.133	0.000107585	Nucleoside phosphorylase OS=Trypanosoma cruzi Dm28c OX=1416333 GN=TCDM_03298 PE=4 SV=1	V5BP86
tr|V5APA0|V5APA0_TRYCR	12	0.401	1.133	80100000000	Retrotransposon hot spot (RHS) protein OS=Trypanosoma cruzi Dm28c OX=1416333 GN=TCDM_13051 PE=4 SV=1	V5APA0
tr|V5AYJ4|V5AYJ4_TRYCR	62	0.644	1.129	320000	ATP-dependent Clp protease subunit OS=Trypanosoma cruzi Dm28c OX=1416333 GN=TCDM_12171 PE=3 SV=1	V5AYJ4
tr|V5DLD4|V5DLD4_TRYCR	17	0.259	1.129	0.000478235	Protein transport protein Sec24A OS=Trypanosoma cruzi Dm28c OX=1416333 GN=TCDM_02973 PE=3 SV=1	V5DLD4
tr|V5BNL9|V5BNL9_TRYCR	15	0.416	1.128	0.000298246	Mercaptopyruvate sulfurtransferase OS=Trypanosoma cruzi Dm28c OX=1416333 GN=TCDM_01945 PE=4 SV=1	V5BNL9
tr|V5BT91|V5BT91_TRYCR	43	0.813	1.125	9830000000	Prostaglandin F2alpha synthase OS=Trypanosoma cruzi Dm28c OX=1416333 GN=TCDM_00059 PE=4 SV=1	V5BT91
tr|V5BCX1|V5BCX1_TRYCR	12	0.383	1.118	0.0001557	Nudix hydrolase domain-containing protein OS=Trypanosoma cruzi Dm28c OX=1416333 GN=TCDM_10104 PE=4 SV=1	V5BCX1
tr|V5BIC8|V5BIC8_TRYCR	29	0.612	1.115	66000	Regulatory subunit of protein kinase a-like protein OS=Trypanosoma cruzi Dm28c OX=1416333 GN=TCDM_07745 PE=4 SV=1	V5BIC8
tr|V5BFG1|V5BFG1_TRYCR	10	0.253	1.115	121000000000	Peptidase M24 domain-containing protein OS=Trypanosoma cruzi Dm28c OX=1416333 GN=TCDM_06984 PE=3 SV=1	V5BFG1
tr|V5D7M3|V5D7M3_TRYCR	14	0.448	1.114	170000000000	Actin interacting protein-like protein OS=Trypanosoma cruzi Dm28c OX=1416333 GN=TCDM_08724 PE=3 SV=1	V5D7M3
tr|V5BK34|V5BK34_TRYCR	8	0.344	1.114	0.0387822	START domain-containing protein OS=Trypanosoma cruzi Dm28c OX=1416333 GN=TCDM_14488 PE=4 SV=1	V5BK34
tr|V5DR72|V5DR72_TRYCR	23	0.583	1.113	0.00652447	60S ribosomal protein L7 OS=Trypanosoma cruzi Dm28c OX=1416333 GN=TCDM_01378 PE=3 SV=1	V5DR72
tr|V5CK45|V5CK45_TRYCR	7	0.132	1.113	0.0102835	Retrotransposon hot spot protein (RHS) OS=Trypanosoma cruzi Dm28c OX=1416333 GN=TCDM_12768 PE=4 SV=1	V5CK45
tr|V5BEE1|V5BEE1_TRYCR	24	0.705	1.112	664000000	Eukaryotic translation initiation factor 3 subunit E OS=Trypanosoma cruzi Dm28c OX=1416333 GN=TCDM_09509 PE=3 SV=1	V5BEE1
tr|V5BBE7|V5BBE7_TRYCR	10	0.187	1.112	0.0405841	ODAD1 central coiled coil region domain-containing protein OS=Trypanosoma cruzi Dm28c OX=1416333 GN=TCDM_08833 PE=4 SV=1	V5BBE7
tr|V5DCF9|V5DCF9_TRYCR	6	0.139	1.112	0.0175796	Uncharacterized protein OS=Trypanosoma cruzi Dm28c OX=1416333 GN=TCDM_06643 PE=4 SV=1	V5DCF9
tr|V5B464|V5B464_TRYCR	18	0.361	1.105	0.0213361	Intraflagellar transport protein-like protein OS=Trypanosoma cruzi Dm28c OX=1416333 GN=TCDM_09928 PE=4 SV=1	V5B464
tr|V5BQL6|V5BQL6_TRYCR	15	0.613	1.105	729000000	Serine-threonine kinase receptor-associated protein OS=Trypanosoma cruzi Dm28c OX=1416333 GN=TCDM_04541 PE=3 SV=1	V5BQL6
tr|V5AZD5|V5AZD5_TRYCR	8	0.132	1.102	0.0030005	Retrotransposon hot spot protein (RHS) OS=Trypanosoma cruzi Dm28c OX=1416333 GN=TCDM_11859 PE=4 SV=1	V5AZD5
tr|V5BDT2|V5BDT2_TRYCR	21	0.382	1.101	46500000000	Ribonuclease L inhibitor OS=Trypanosoma cruzi Dm28c OX=1416333 GN=TCDM_05627 PE=4 SV=1	V5BDT2
tr|V5B6A2|V5B6A2_TRYCR	18	0.385	1.099	0.00015737	Phosphomannomutase-like protein OS=Trypanosoma cruzi Dm28c OX=1416333 GN=TCDM_02490 PE=3 SV=1	V5B6A2
tr|V5BAJ7|V5BAJ7_TRYCR	9	0.131	1.099	0.018752	Methyltransferase OS=Trypanosoma cruzi Dm28c OX=1416333 GN=TCDM_09202 PE=4 SV=1	V5BAJ7
tr|V5DJI3|V5DJI3_TRYCR	10	0.608	1.098	0.00311012	Prefoldin subunit 2 OS=Trypanosoma cruzi Dm28c OX=1416333 GN=TCDM_14024 PE=3 SV=1	V5DJI3
tr|V5B747|V5B747_TRYCR	23	0.574	1.096	90500000000	Uncharacterized protein OS=Trypanosoma cruzi Dm28c OX=1416333 GN=TCDM_02058 PE=4 SV=1	V5B747
tr|V5BN95|V5BN95_TRYCR	8	0.377	1.095	0.0162618	RRM domain-containing protein OS=Trypanosoma cruzi Dm28c OX=1416333 GN=TCDM_05498 PE=4 SV=1	V5BN95
tr|V5DUQ5|V5DUQ5_TRYCR	24	0.574	1.093	0.000267198	Cystathione gamma lyase OS=Trypanosoma cruzi Dm28c OX=1416333 GN=TCDM_00169 PE=3 SV=1	V5DUQ5
tr|V5BK55|V5BK55_TRYCR	8	0.313	1.093	0.0491364	Glycosyl transferase-like protein OS=Trypanosoma cruzi Dm28c OX=1416333 GN=TCDM_06904 PE=4 SV=1	V5BK55
tr|V5BC28|V5BC28_TRYCR	13	0.309	1.092	117000000	non-specific serine/threonine protein kinase OS=Trypanosoma cruzi Dm28c OX=1416333 GN=TCDM_08577 PE=3 SV=1	V5BC28
tr|V5BPB2|V5BPB2_TRYCR	7	0.119	1.091	0.00926348	Peroxisomal targeting signal type 2 receptor OS=Trypanosoma cruzi Dm28c OX=1416333 GN=TCDM_01629 PE=4 SV=1	V5BPB2
tr|V5DEM3|V5DEM3_TRYCR	36	0.609	1.09	31.1	methionine--tRNA ligase OS=Trypanosoma cruzi Dm28c OX=1416333 GN=TCDM_05606 PE=3 SV=1	V5DEM3
tr|V5BJM3|V5BJM3_TRYCR	11	0.327	1.09	0.0106923	Transcription elongation factor-like protein OS=Trypanosoma cruzi Dm28c OX=1416333 GN=TCDM_07200 PE=4 SV=1	V5BJM3
tr|V5DCD0|V5DCD0_TRYCR	30	0.458	1.089	62200000	Retrotransposon hot spot (RHS) protein OS=Trypanosoma cruzi Dm28c OX=1416333 GN=TCDM_06598 PE=4 SV=1	V5DCD0
tr|V5B793|V5B793_TRYCR	27	0.629	1.089	16900000000	Eukaryotic translation initiation factor 3 subunit 7-like protein OS=Trypanosoma cruzi Dm28c OX=1416333 GN=TCDM_02127 PE=4 SV=1	V5B793
tr|V5BLZ3|V5BLZ3_TRYCR	13	0.293	1.089	0.00879958	NTF2 domain-containing protein OS=Trypanosoma cruzi Dm28c OX=1416333 GN=TCDM_02323 PE=4 SV=1	V5BLZ3
tr|V5BPA3|V5BPA3_TRYCR	4	0.154	1.089	0.000419625	Flagellar protofilament ribbon protein OS=Trypanosoma cruzi Dm28c OX=1416333 GN=TCDM_03327 PE=3 SV=1	V5BPA3
tr|V5DBM6|V5DBM6_TRYCR	14	0.776	1.088	0.00280002	Translationally controlled tumor protein (TCTP) OS=Trypanosoma cruzi Dm28c OX=1416333 GN=TCDM_14344 PE=3 SV=1	V5DBM6
tr|V5B3M4|V5B3M4_TRYCR	9	0.301	1.088	0.000281966	Retrotransposon hot spot (RHS) protein OS=Trypanosoma cruzi Dm28c OX=1416333 GN=TCDM_12338 PE=4 SV=1	V5B3M4
tr|V5DD36|V5DD36_TRYCR	5	0.119	1.087	0.0103558	Zn-finger protein OS=Trypanosoma cruzi Dm28c OX=1416333 GN=TCDM_06286 PE=4 SV=1	V5DD36
tr|V5BEC0|V5BEC0_TRYCR	5	0.207	1.086	0.0220216	Ubiquinone biosynthesis protein OS=Trypanosoma cruzi Dm28c OX=1416333 GN=TCDM_05439 PE=3 SV=1	V5BEC0
tr|V5BP59|V5BP59_TRYCR	12	0.375	1.085	0.00146391	Uncharacterized protein OS=Trypanosoma cruzi Dm28c OX=1416333 GN=TCDM_03263 PE=4 SV=1	V5BP59
tr|V5BFQ9|V5BFQ9_TRYCR	15	0.639	1.084	44500000000	rRNA 2'-O-methyltransferase fibrillarin OS=Trypanosoma cruzi Dm28c OX=1416333 GN=TCDM_04780 PE=3 SV=1	V5BFQ9
tr|V5AVM2|V5AVM2_TRYCR	18	0.409	1.083	0.000114198	Ubiquitin-like protein OS=Trypanosoma cruzi Dm28c OX=1416333 GN=TCDM_06868 PE=4 SV=1	V5AVM2
tr|V5DHJ5|V5DHJ5_TRYCR	28	0.572	1.079	0.000675511	T-complex protein 1 subunit epsilon OS=Trypanosoma cruzi Dm28c OX=1416333 GN=TCDM_04420 PE=3 SV=1	V5DHJ5
tr|V5DRE7|V5DRE7_TRYCR	25	0.4	1.077	60300000000	N-acetyltransferase subunit Nat1 OS=Trypanosoma cruzi Dm28c OX=1416333 GN=TCDM_01100 PE=4 SV=1	V5DRE7
tr|V5BQG4|V5BQG4_TRYCR	22	0.498	1.077	2240000000	Nuclear RNA export factor 1/2 OS=Trypanosoma cruzi Dm28c OX=1416333 GN=TCDM_04475 PE=4 SV=1	V5BQG4
tr|V5BH81|V5BH81_TRYCR	35	0.634	1.075	122000	Uncharacterized protein OS=Trypanosoma cruzi Dm28c OX=1416333 GN=TCDM_04319 PE=4 SV=1	V5BH81
tr|V5BLS2|V5BLS2_TRYCR	12	0.645	1.075	0.000283948	AB hydrolase-1 domain-containing protein OS=Trypanosoma cruzi Dm28c OX=1416333 GN=TCDM_02453 PE=4 SV=1	V5BLS2
tr|V5BPQ4|V5BPQ4_TRYCR	7	0.669	1.074	0.000692876	Calmodulin OS=Trypanosoma cruzi Dm28c OX=1416333 GN=TCDM_03093 PE=4 SV=1	V5BPQ4
tr|V5DQ66|V5DQ66_TRYCR	7	0.64	1.074	0.0317366	Centrin OS=Trypanosoma cruzi Dm28c OX=1416333 GN=TCDM_14269 PE=3 SV=1	V5DQ66
tr|V5DBD1|V5DBD1_TRYCR	11	0.314	1.071	0.00075403	Phosphonopyruvate decarboxylase OS=Trypanosoma cruzi Dm28c OX=1416333 GN=TCDM_07117 PE=4 SV=1	V5DBD1
tr|V5BZH5|V5BZH5_TRYCR	8	0.532	1.071	0.00350306	Eukaryotic translation initiation factor 4E type 6 OS=Trypanosoma cruzi Dm28c OX=1416333 GN=TCDM_14203 PE=4 SV=1	V5BZH5
tr|V5DU18|V5DU18_TRYCR	13	0.223	1.07	0.00681063	MP99 OS=Trypanosoma cruzi Dm28c OX=1416333 GN=TCDM_00368 PE=4 SV=1	V5DU18
tr|V5DRS6|V5DRS6_TRYCR	69	0.717	1.069	24500000000	Elongation factor 2 OS=Trypanosoma cruzi Dm28c OX=1416333 GN=TCDM_01229 PE=4 SV=1	V5DRS6
tr|V5B7Q9|V5B7Q9_TRYCR	16	0.199	1.068	16900000000	Retrotransposon hot spot protein (RHS) OS=Trypanosoma cruzi Dm28c OX=1416333 GN=TCDM_12059 PE=4 SV=1	V5B7Q9
tr|V5BHW0|V5BHW0_TRYCR	8	0.174	1.068	0.00959737	3-ketoacyl-CoA thiolase OS=Trypanosoma cruzi Dm28c OX=1416333 GN=TCDM_07990 PE=4 SV=1	V5BHW0
tr|V5BZN6|V5BZN6_TRYCR	19	0.356	1.066	0.000688486	Pumilio protein OS=Trypanosoma cruzi Dm28c OX=1416333 GN=TCDM_01096 PE=4 SV=1	V5BZN6
tr|V5BIU4|V5BIU4_TRYCR	17	0.414	1.066	64400000000	Poly [ADP-ribose] polymerase OS=Trypanosoma cruzi Dm28c OX=1416333 GN=TCDM_07478 PE=4 SV=1	V5BIU4
tr|V5BW37|V5BW37_TRYCR	7	0.135	1.065	0.00140049	AP-1 complex subunit gamma OS=Trypanosoma cruzi Dm28c OX=1416333 GN=TCDM_02471 PE=3 SV=1	V5BW37
tr|V5B3T7|V5B3T7_TRYCR	24	0.513	1.064	0.00347367	Aminopeptidase P OS=Trypanosoma cruzi Dm28c OX=1416333 GN=TCDM_03358 PE=4 SV=1	V5B3T7
tr|V5BSB1|V5BSB1_TRYCR	15	0.469	1.064	0.000428135	RNA-binding protein OS=Trypanosoma cruzi Dm28c OX=1416333 GN=TCDM_00524 PE=4 SV=1	V5BSB1
tr|V5AVW1|V5AVW1_TRYCR	11	0.336	1.062	0.00120463	HNRNPA OS=Trypanosoma cruzi Dm28c OX=1416333 GN=TCDM_06782 PE=4 SV=1	V5AVW1
tr|V5BL63|V5BL63_TRYCR	35	0.564	1.061	19800000000	Dipeptidyl-peptidase OS=Trypanosoma cruzi Dm28c OX=1416333 GN=TCDM_06384 PE=4 SV=1	V5BL63
tr|V5BV46|V5BV46_TRYCR	16	0.48	1.061	94300000000	Thiolase protein-like protein OS=Trypanosoma cruzi Dm28c OX=1416333 GN=TCDM_02821 PE=3 SV=1	V5BV46
tr|V5BD32|V5BD32_TRYCR	33	0.689	1.057	56600000	CCT-theta OS=Trypanosoma cruzi Dm28c OX=1416333 GN=TCDM_05987 PE=3 SV=1	V5BD32
tr|V5AQD0|V5AQD0_TRYCR	11	0.38	1.057	0.00120859	Microtubule-associated protein OS=Trypanosoma cruzi Dm28c OX=1416333 GN=TCDM_09288 PE=4 SV=1	V5AQD0
tr|V5BL57|V5BL57_TRYCR	32	0.536	1.055	0.0069009	TNase-like domain-containing protein OS=Trypanosoma cruzi Dm28c OX=1416333 GN=TCDM_04405 PE=4 SV=1	V5BL57
tr|V5BSS5|V5BSS5_TRYCR	20	0.603	1.055	0.000508467	26S protease regulatory subunit OS=Trypanosoma cruzi Dm28c OX=1416333 GN=TCDM_00379 PE=3 SV=1	V5BSS5
tr|V5D0L1|V5D0L1_TRYCR	11	0.265	1.053	0.00176616	Retrotransposon hot spot (RHS) protein OS=Trypanosoma cruzi Dm28c OX=1416333 GN=TCDM_11448 PE=4 SV=1	V5D0L1
tr|V5BCZ7|V5BCZ7_TRYCR	20	0.411	1.052	8570000000	Putative ubiquitin-activating enzyme e1 OS=Trypanosoma cruzi Dm28c OX=1416333 GN=TCDM_00193 PE=3 SV=1	V5BCZ7
tr|V5BX15|V5BX15_TRYCR	18	0.385	1.052	83700000000	CYTH domain-containing protein OS=Trypanosoma cruzi Dm28c OX=1416333 GN=TCDM_00569 PE=4 SV=1	V5BX15
tr|V5BU29|V5BU29_TRYCR	17	0.433	1.051	2240000000	Aldehyde dehydrogenase OS=Trypanosoma cruzi Dm28c OX=1416333 GN=TCDM_03177 PE=3 SV=1	V5BU29
tr|V5DTI3|V5DTI3_TRYCR	15	0.309	1.051	0.000326043	Protein kinase OS=Trypanosoma cruzi Dm28c OX=1416333 GN=TCDM_00502 PE=4 SV=1	V5DTI3
tr|V5AYD4|V5AYD4_TRYCR	3	0.015	1.051	0.00410471	Basal body component OS=Trypanosoma cruzi Dm28c OX=1416333 GN=TCDM_05595 PE=4 SV=1	V5AYD4
tr|V5BDP3|V5BDP3_TRYCR	8	0.377	1.05	0.000781751	E2 ubiquitin-conjugating enzyme OS=Trypanosoma cruzi Dm28c OX=1416333 GN=TCDM_14074 PE=3 SV=1	V5BDP3
tr|V5BLN7|V5BLN7_TRYCR	19	0.608	1.049	0.0254871	Guanine deaminase OS=Trypanosoma cruzi Dm28c OX=1416333 GN=TCDM_04261 PE=3 SV=1	V5BLN7
tr|V5B917|V5B917_TRYCR	10	0.327	1.048	0.00365226	NADH-dependent fumarate reductase OS=Trypanosoma cruzi Dm28c OX=1416333 GN=TCDM_07892 PE=4 SV=1	V5B917
tr|V5BHT5|V5BHT5_TRYCR	13	0.312	1.047	0.00131631	Nuclear migration protein nudC OS=Trypanosoma cruzi Dm28c OX=1416333 GN=TCDM_05939 PE=3 SV=1	V5BHT5
tr|V5DKQ7|V5DKQ7_TRYCR	12	0.394	1.047	1000000000	Rab1 small GTP-binding protein OS=Trypanosoma cruzi Dm28c OX=1416333 GN=TCDM_03326 PE=3 SV=1	V5DKQ7
tr|V5DSI1|V5DSI1_TRYCR	35	0.591	1.046	0.000161876	Malic enzyme OS=Trypanosoma cruzi Dm28c OX=1416333 GN=TCDM_00813 PE=3 SV=1	V5DSI1
tr|V5BH27|V5BH27_TRYCR	12	0.281	1.044	61600000000	Mitochondrial processing peptide beta subunit OS=Trypanosoma cruzi Dm28c OX=1416333 GN=TCDM_06224 PE=3 SV=1	V5BH27
tr|V5BUJ8|V5BUJ8_TRYCR	18	0.403	1.043	0.000342423	Hsc70-interacting protein OS=Trypanosoma cruzi Dm28c OX=1416333 GN=TCDM_02981 PE=4 SV=1	V5BUJ8
tr|V5D6I4|V5D6I4_TRYCR	23	0.306	1.042	4420000000	FHA domain-containing protein OS=Trypanosoma cruzi Dm28c OX=1416333 GN=TCDM_09201 PE=4 SV=1	V5D6I4
tr|V5B6K3|V5B6K3_TRYCR	10	0.532	1.041	0.0113892	Pre-mRNA-processing factor 19 OS=Trypanosoma cruzi Dm28c OX=1416333 GN=TCDM_08983 PE=3 SV=1	V5B6K3
tr|V5B0B5|V5B0B5_TRYCR	24	0.652	1.039	0.00353257	Succinyl-CoA ligase [GDP-forming] beta-chain OS=Trypanosoma cruzi Dm28c OX=1416333 GN=TCDM_04788 PE=4 SV=1	V5B0B5
tr|V5BPJ0|V5BPJ0_TRYCR	15	0.406	1.039	472000000000	non-specific serine/threonine protein kinase OS=Trypanosoma cruzi Dm28c OX=1416333 GN=TCDM_03208 PE=3 SV=1	V5BPJ0
tr|V5BSC7|V5BSC7_TRYCR	9	0.211	1.036	0.0181724	DNA ligase OS=Trypanosoma cruzi Dm28c OX=1416333 GN=TCDM_02075 PE=3 SV=1	V5BSC7
tr|V5BA93|V5BA93_TRYCR	11	0.551	1.035	36500000000	Uracil phosphoribosyltransferase OS=Trypanosoma cruzi Dm28c OX=1416333 GN=TCDM_07304 PE=4 SV=1	V5BA93
tr|V5CK09|V5CK09_TRYCR	37	0.822	1.034	8200	Dynamin-like protein OS=Trypanosoma cruzi Dm28c OX=1416333 GN=TCDM_12808 PE=4 SV=1	V5CK09
tr|V5BDA8|V5BDA8_TRYCR	9	0.26	1.034	0.00923725	Uncharacterized protein OS=Trypanosoma cruzi Dm28c OX=1416333 GN=TCDM_05872 PE=4 SV=1	V5BDA8
tr|V5AW96|V5AW96_TRYCR	13	0.749	1.033	0.00151079	CSN8/PSMD8/EIF3K domain-containing protein OS=Trypanosoma cruzi Dm28c OX=1416333 GN=TCDM_14207 PE=4 SV=1	V5AW96
tr|V5BJ49|V5BJ49_TRYCR	43	0.411	1.032	21700	isoleucine--tRNA ligase OS=Trypanosoma cruzi Dm28c OX=1416333 GN=TCDM_03509 PE=3 SV=1	V5BJ49
tr|V5BW71|V5BW71_TRYCR	20	0.617	1.032	87100000	Proteasome alpha 7 subunit OS=Trypanosoma cruzi Dm28c OX=1416333 GN=TCDM_00598 PE=3 SV=1	V5BW71
tr|V5DIT1|V5DIT1_TRYCR	14	0.47	1.032	0.00189107	Glycerol kinase OS=Trypanosoma cruzi Dm28c OX=1416333 GN=TCDM_03940 PE=4 SV=1	V5DIT1
tr|V5BXQ7|V5BXQ7_TRYCR	9	0.396	1.03	0.00457142	Deoxyuridine triphosphatase OS=Trypanosoma cruzi Dm28c OX=1416333 GN=TCDM_01832 PE=4 SV=1	V5BXQ7
tr|V5BTG9|V5BTG9_TRYCR	13	0.454	1.029	565000000000	Ubiquitin-activating enzyme e1 OS=Trypanosoma cruzi Dm28c OX=1416333 GN=TCDM_00192 PE=3 SV=1	V5BTG9
tr|V5BBD2|V5BBD2_TRYCR	10	0.366	1.029	0.000306991	Agmatinase OS=Trypanosoma cruzi Dm28c OX=1416333 GN=TCDM_10701 PE=3 SV=1	V5BBD2
tr|V5BWB9|V5BWB9_TRYCR	9	0.281	1.026	0.00171377	Peroxisomal enoyl-coa hydratase OS=Trypanosoma cruzi Dm28c OX=1416333 GN=TCDM_02351 PE=4 SV=1	V5BWB9
tr|V5BPS0|V5BPS0_TRYCR	23	0.584	1.025	0.000287981	Short chain 3-hydroxyacyl-CoA dehydrogenase OS=Trypanosoma cruzi Dm28c OX=1416333 GN=TCDM_04758 PE=3 SV=1	V5BPS0
tr|V5DLV2|V5DLV2_TRYCR	20	0.398	1.025	73700000000	Regulatory subunit of protein kinase a-like protein OS=Trypanosoma cruzi Dm28c OX=1416333 GN=TCDM_02777 PE=4 SV=1	V5DLV2
tr|V5BGH8|V5BGH8_TRYCR	19	0.471	1.024	9070000000	fumarate hydratase OS=Trypanosoma cruzi Dm28c OX=1416333 GN=TCDM_06503 PE=3 SV=1	V5BGH8
tr|V5B599|V5B599_TRYCR	32	0.492	1.022	0.000535257	Ribosomal protein L13 OS=Trypanosoma cruzi Dm28c OX=1416333 GN=TCDM_02783 PE=1 SV=1	V5B599
tr|V5BWY3|V5BWY3_TRYCR	12	0.208	1.022	0.0207981	Kinesin-like protein OS=Trypanosoma cruzi Dm28c OX=1416333 GN=TCDM_00513 PE=3 SV=1	V5BWY3
tr|V5DU29|V5DU29_TRYCR	16	0.206	1.017	0.00541744	RRM domain-containing protein OS=Trypanosoma cruzi Dm28c OX=1416333 GN=TCDM_00381 PE=4 SV=1	V5DU29
tr|V5B6G9|V5B6G9_TRYCR	61	0.673	1.015	730000000	Aconitate hydratase OS=Trypanosoma cruzi Dm28c OX=1416333 GN=TCDM_02343 PE=3 SV=1	V5B6G9
tr|V5B314|V5B314_TRYCR	15	0.231	1.014	0.00520809	Uncharacterized protein OS=Trypanosoma cruzi Dm28c OX=1416333 GN=TCDM_03823 PE=4 SV=1	V5B314
tr|V5BJF4|V5BJF4_TRYCR	27	0.669	1.012	0.000192203	Dihydrolipoamide acetyltransferase component of pyruvate dehydrogenase complex OS=Trypanosoma cruzi Dm28c OX=1416333 GN=TCDM_07278 PE=3 SV=1	V5BJF4
tr|V5C1Q5|V5C1Q5_TRYCR	11	0.438	1.012	47800000000	Proteasome regulatory non-ATPase subunit 8 OS=Trypanosoma cruzi Dm28c OX=1416333 GN=TCDM_00473 PE=4 SV=1	V5C1Q5
tr|V5BAY3|V5BAY3_TRYCR	40	0.304	1.011	1010000000	Intraflagellar transport protein 172 OS=Trypanosoma cruzi Dm28c OX=1416333 GN=TCDM_09027 PE=3 SV=1	V5BAY3
tr|V5CJ82|V5CJ82_TRYCR	20	0.242	1.01	0.00128901	Retrotransposon hot spot protein (RHS) OS=Trypanosoma cruzi Dm28c OX=1416333 GN=TCDM_13094 PE=4 SV=1	V5CJ82
tr|V5BBT3|V5BBT3_TRYCR	8	0.335	1.01	0.0399878	Uncharacterized protein OS=Trypanosoma cruzi Dm28c OX=1416333 GN=TCDM_00495 PE=4 SV=1	V5BBT3
tr|V5B4E8|V5B4E8_TRYCR	16	0.691	1.007	0.00115864	Proteasome subunit alpha type OS=Trypanosoma cruzi Dm28c OX=1416333 GN=TCDM_03196 PE=3 SV=1	V5B4E8
tr|V5BCW8|V5BCW8_TRYCR	9	0.498	1.007	0.0189305	Haloacid dehalogenase-like hydrolase OS=Trypanosoma cruzi Dm28c OX=1416333 GN=TCDM_10099 PE=4 SV=1	V5BCW8
tr|V5B0X7|V5B0X7_TRYCR	6	0.241	1.007	0.0351217	Eukaryotic translation initiation factor eIF-4E OS=Trypanosoma cruzi Dm28c OX=1416333 GN=TCDM_04491 PE=3 SV=1	V5B0X7
tr|V5B6E4|V5B6E4_TRYCR	21	0.563	1.006	0.00312176	Activator of Hsp90 ATPase AHSA1-like N-terminal domain-containing protein OS=Trypanosoma cruzi Dm28c OX=1416333 GN=TCDM_02309 PE=3 SV=1	V5B6E4
tr|V5BGW0|V5BGW0_TRYCR	12	0.289	1.005	0.0439377	Translation initiation factor OS=Trypanosoma cruzi Dm28c OX=1416333 GN=TCDM_04357 PE=3 SV=1	V5BGW0
tr|V5BWL1|V5BWL1_TRYCR	6	0.362	1.004	0.0203554	Cytoplasmic translation machinery associated protein OS=Trypanosoma cruzi Dm28c OX=1416333 GN=TCDM_14249 PE=4 SV=1	V5BWL1
tr|V5BA05|V5BA05_TRYCR	26	0.573	1.001	600000	Calpain cysteine peptidase OS=Trypanosoma cruzi Dm28c OX=1416333 GN=TCDM_09422 PE=4 SV=1	V5BA05
tr|V5BXZ9|V5BXZ9_TRYCR	23	0.565	1.001	4350000000	DUF4201 domain-containing protein OS=Trypanosoma cruzi Dm28c OX=1416333 GN=TCDM_00116 PE=4 SV=1	V5BXZ9
tr|V5BS76|V5BS76_TRYCR	14	0.341	1.001	0.0166728	Uncharacterized protein OS=Trypanosoma cruzi Dm28c OX=1416333 GN=TCDM_00466 PE=4 SV=1	V5BS76
tr|V5BX62|V5BX62_TRYCR	14	0.298	1	25300000000	Chaperonin HSP60/CNP60 OS=Trypanosoma cruzi Dm28c OX=1416333 GN=TCDM_02151 PE=3 SV=1	V5BX62

## Sheet: increasedRe-compouund
Relative abundance increased in parasites treated with fac-[Re(CO)3(tmp)(CTZ)](PF6)
Locus	Peptide Count	Coverage %	Log2(FoldChange)	p-value	Description	Acc nro Uniprot Tc Dm28c
tr|V5BU64|V5BU64_TRYCR	9	0.658	-4.12	75600000000	Universal minicircle sequence binding protein (UMSBP) OS=Trypanosoma cruzi Dm28c OX=1416333 GN=TCDM_13905 PE=4 SV=1	V5BU64
